# Supplementary material for: Discovery of RUF6 ncRNA–interacting proteins involved in P. falciparum immune evasion
Source: Life Sci Alliance. 2022 Nov 15;6(1):e202201577. doi: 10.26508/lsa.202201577 (PMC9670795; doi:10.26508/lsa.202201577)
Supplement: Supplementary file 1 [file LSA-2022-01577_TableS1.xlsx]

## Sheet: Table S1
EMSA
Primer name	Sequence
Primers to amplify gDNA Pf3D7_1241000	F: 5’-AAG-CTG-CCT-CAG-TAG-CCC-3’ R: 5’-TTG-CGC-CAC-CCC-CCT-C-3’
Pf3D7_1241000 probes:
Sense:	Biotin:AAGCUGCCUCAGUAGCCCAAUCGUUAGGUAUGUUGCCUUUCCUUGUGAGAACGUUGGUUCGACUCCGCUUGCCGACAAUUUCAUAGGAAAAGUUGCAGAUCGAGCUGUUGGGUUACCCGGAGGGGGGCGGCGCAA
Antisense:	Biotin:UUGCGCCGCCCCCCUCCGGGUAACCCAACAGCUCGAUCUGCAACUUUUCCUAUGAAAUUGUCGGCAAGCGGAGUCAACCAACGUUCUCACAAGGAAAGGCAACAUACCUAACGAUUGGGCUACUGAGGCAGCUU
Sense:	AAGCUGCCUCAGUAGCCCAAUCGUUAGGUAUGUUGCCUUUCCUUGUGAGAACGUUGGUUCGACUCCGCUUGCCGACAAUUUCAUAGGAAAAGUUGCAGAUCGAGCUGUUGGGUUACCCGGAGGGGGGCGGCGCAA:Biotin
Antisense:	UUGCGCCGCCCCCCUCCGGGUAACCCAACAGCUCGAUCUGCAACUUUUCCUAUGAAAUUGUCGGCAAGCGGAGUCAACCAACGUUCUCACAAGGAAAGGCAACAUACCUAACGAUUGGGCUACUGAGGCAGCUU:Biotin
ChIRP
Probe name	Sequence
RUF6 1 (odd set)	TACCTAACGACTGGGCTACTG
RUF6 2 (even set)	TCGAACCAACGTTCTCACAAG
RUF6 3 (odd set)	TGAAATTGTTGGCAAGCGGAG
RUF6 4 (even set)	CTCCGGGTAACTCAGCAGCTC
Scrambled 1	GGCCTGTTATGTCGATTCGA
Scrambled 2	GGAACGACATAGTCTGAATG
qPCR/PCR
Primer name	Sequence
RUF6-A	Forward: 5'-AAGCTGCCTCAGTAGCCCA-3' Reverse: 5'-AAAAATTGCGCCACCCCC-3'
RUF6-B	Forward: 5'-AAGCTGCCCCAGTAGCCCA-3' Reverse: 5'-AAAAATTGCGCCGCCCCC-3'
fructose-bisphosphate aldolase (FBA, Pf3D7_1444800)	Forward: 5’-TGTACCACCAGCCTTACCAG-3’ Reverse: 5’-TTCCTTGCCATGTGTTCAAT-3’
SLI HB:
SLI 3 Forward primer	5’- ATGCTCACACAGCAAGATCAG-3’
SLI 3 Reverse primer	5’ ATGCTCACACAGCAAGATCAG-3’
SLI 5 Forward primer	5’-TGTTTTGTGTCGTACATTTGCAT-3’
SLI 5 Reverse primer	5’-GTAAAATCTGTTATTTCCTCTTAGTGG-3’
SLI Integration check:
SLI check reverse primer	5’-ACCTTCACCCTCTCCACTGAC-3’
SLI 3 WT locus check reverse	5'-GAGGAGCATGTAAATATATTCATTTTAC-3'
SLI 5 WT locus check reverse	5'-ATATATATATGTATATTATAATAATATTAGTAAAATCTG-3'
BSD primers for mislocalizer	Forward: 5’-GAA GAC TAC AGC GTC GCC AGC GC-3’ Reverse: 5’-CTC CCA CAC ATA ACC AGA GGG CAG C-3’

## Sheet: Table S1 legend
Table S1. Sequences used for probes and primers for EMSA, ChIRP, and PCR/qPCR.
