# Supplementary material for: Discovery of RUF6 ncRNA–interacting proteins involved in P. falciparum immune evasion
Source: Life Sci Alliance. 2022 Nov 15;6(1):e202201577. doi: 10.26508/lsa.202201577 (PMC9670795; doi:10.26508/lsa.202201577)
Supplement: Supplementary file 2 [file LSA-2022-01577_SdataF2.xlsx]

## Sheet: Figure 2D table
Proteins	MW (kDa)	Description
Pf3D7_0318200	278.7	DNA-directed RNA polymerase II subunit RPB1
Pf3D7_0605100	85.6	RNA-binding protein
Pf3D7_1423700	183.6	conserved Plasmodium protein, unknown function
Pf3D7_1445900	60	ATP-dependent RNA helicase DDX5
Pf3D7_1023900	381.3	chromodomain-helicase-DNA-binding protein 1
Pf3D7_1104200	167.4	chromatin remodeling protein
Pf3D7_1002400	30.1	transformer-2 protein
Pf3D7_0819600	32.2	conserved Plasmodium protein, unknown function
Pf3D7_0923900	23	RNA-binding protein
Pf3D7_1007700	182.7	AP2 domain transcription factor AP2-I
Pf3D7_1107300	381.9	polyadenylate-binding protein-interacting protein 1
Pf3D7_1110200	152.2	pre-mRNA-processing factor 6
Pf3D7_1330800	68	RNA-binding protein
Pf3D7_1455300	69.5	conserved Plasmodium protein, unknown function
Pf3D7_0919000	31.8	nucleosome assembly protein
