# Supplementary material for: Discovery of RUF6 ncRNA–interacting proteins involved in P. falciparum immune evasion
Source: Life Sci Alliance. 2022 Nov 15;6(1):e202201577. doi: 10.26508/lsa.202201577 (PMC9670795; doi:10.26508/lsa.202201577)
Supplement: Supplementary file 3 [file LSA-2022-01577_TableS2.xlsx]

## Sheet: Table S2
Table S2: Total proteins detected by LC-MS/MS in ChIRP samples (all P. falciparum proteins detected with FDR ≤ 1%, ≥ 3 peptides in all replicates)
571 proteins	MW (kDa)	Description
PF3D7_0102200	126.5	ring-infected erythrocyte surface antigen
PF3D7_0103900	67.8	parasite-infected erythrocyte surface protein
PF3D7_0106100	45.3	V-type proton ATPase subunit C, putative
PF3D7_0106300	139.4	calcium-transporting ATPase
PF3D7_0106800	24.3	ras-related protein Rab-5C
PF3D7_0107100	65.7	conserved Plasmodium protein, unknown function
PF3D7_0107500	170.3	lipid/sterol:H+ symporter
PF3D7_0108300	255	conserved Plasmodium protein, unknown function
PF3D7_0108700	135.6	secreted ookinete protein, putative
PF3D7_0111500	44.2	UMP-CMP kinase, putative
PF3D7_0113000	79.8	glutamic acid-rich protein
PF3D7_0113200	70.1	Plasmodium exported protein, unknown function
PF3D7_0113300	71	Plasmodium exported protein (hyp1), unknown function
PF3D7_0113900	28.2	CX3CL1-binding protein 1
PF3D7_0201800	48.3	knob associated heat shock protein 40
PF3D7_0201900	273.6	erythrocyte membrane protein 3
PF3D7_0202000	71.3	knob-associated histidine-rich protein
PF3D7_0202400	141.8	translation-enhancing factor
PF3D7_0202500	11.5	early transcribed membrane protein 2
PF3D7_0205500	15.1	DNA-directed RNA polymerase II 16 kDa subunit, putative
PF3D7_0205900	108.4	26S proteasome regulatory subunit RPN1, putative
PF3D7_0206800	28	merozoite surface protein 2
PF3D7_0209800	52.2	ATP-dependent RNA helicase UAP56
PF3D7_0210900	32.5	conserved Plasmodium protein, unknown function
PF3D7_0211800	70.5	asparagine--tRNA ligase
PF3D7_0212300	48.1	peptide chain release factor subunit 1, putative
PF3D7_0212400	494.2	conserved Plasmodium membrane protein, unknown function
PF3D7_0213100	37.4	protein SIS1
PF3D7_0214000	61	T-complex protein 1 subunit theta
PF3D7_0214100	166.7	protein transport protein SEC31
PF3D7_0215700	151.7	DNA-directed RNA polymerase II subunit RPB2, putative
PF3D7_0217900	60.6	conserved Plasmodium protein, unknown function
PF3D7_0219600	104.2	replication factor C subunit 1, putative
PF3D7_0220000	175.7	liver stage antigen 3
PF3D7_0302500	167.2	cytoadherence linked asexual protein 3.1
PF3D7_0302900	147.9	exportin-1, putative
PF3D7_0305200	135.8	conserved Plasmodium protein, unknown function
PF3D7_0306200	41.6	activator of Hsp90 ATPase
PF3D7_0306800	59.2	T-complex protein 1 subunit beta
PF3D7_0307100	15.4	40S ribosomal protein S12, putative
PF3D7_0307200	30.5	60S ribosomal protein L7, putative
PF3D7_0308600	60.8	pre-mRNA-processing factor 19, putative
PF3D7_0309500	69.9	asparagine synthetase [glutamine-hydrolyzing], putative
PF3D7_0309600	11.9	60S acidic ribosomal protein P2
PF3D7_0310200	534.1	phd finger protein, putative
PF3D7_0310400	154.1	parasite-infected erythrocyte surface protein
PF3D7_0312500	67.8	major facilitator superfamily-related transporter, putative
PF3D7_0312800	14.8	60S ribosomal protein L26, putative
PF3D7_0315100	26.9	eukaryotic translation initiation factor 4E
PF3D7_0316600	34.5	formate-nitrite transporter
PF3D7_0316700	26	protein YOP1, putative
PF3D7_0317600	18.8	40S ribosomal protein S11, putative
PF3D7_0318200	278.7	DNA-directed RNA polymerase II subunit RPB1
PF3D7_0318500	593.3	conserved Plasmodium protein, unknown function
PF3D7_0320300	59.2	T-complex protein 1 subunit epsilon
PF3D7_0320900	16.5	histone H2A.Z
PF3D7_0322000	19	peptidyl-prolyl cis-trans isomerase
PF3D7_0322900	30	40S ribosomal protein S3A, putative
PF3D7_0401800	60.3	Plasmodium exported protein (PHISTb), unknown function
PF3D7_0402000	49.7	Plasmodium exported protein (PHISTa), unknown function
PF3D7_0402100	67.8	Plasmodium exported protein (PHISTb), unknown function
PF3D7_0405400	366.4	pre-mRNA-processing-splicing factor 8, putative
PF3D7_0405500	26.9	conserved Plasmodium protein, unknown function
PF3D7_0406100	55.8	V-type proton ATPase subunit B
PF3D7_0407800	230.1	conserved Plasmodium protein, unknown function
PF3D7_0409000	312.5	conserved Plasmodium protein, unknown function
PF3D7_0410900	117.5	conserved Plasmodium protein, unknown function
PF3D7_0412700	256.1	erythrocyte membrane protein 1, PfEMP1
PF3D7_0413500	35.2	phosphoglucomutase-2
PF3D7_0413600	44.7	26S protease regulatory subunit 6B, putative
PF3D7_0413900	98.5	ubiquitin carboxyl-terminal hydrolase 13, putative
PF3D7_0415900	24.1	60S ribosomal protein L15, putative
PF3D7_0418200	51	eukaryotic translation initiation factor 3 subunit M, putative
PF3D7_0419600	33.2	ran-specific GTPase-activating protein 1, putative
PF3D7_0420300	400.2	AP2 domain transcription factor, putative
PF3D7_0422400	19.7	40S ribosomal protein S19
PF3D7_0423500	42.6	glideosome associated protein with multiple membrane spans 2
PF3D7_0424600	36	Plasmodium exported protein (PHISTb), unknown function
PF3D7_0500800	168.3	mature parasite-infected erythrocyte surface antigen
PF3D7_0501200	48.7	parasite-infected erythrocyte surface protein
PF3D7_0501300	36.3	skeleton-binding protein 1
PF3D7_0501500	47	rhoptry-associated protein 3
PF3D7_0501600	46.7	rhoptry-associated protein 2
PF3D7_0502400	69.4	merozoite surface protein 8
PF3D7_0503400	13.7	actin-depolymerizing factor 1
PF3D7_0506100	24.9	60S ribosomal subunit protein L24, putative
PF3D7_0506900	86.7	rhomboid protease ROM4
PF3D7_0507100	46.2	60S ribosomal protein L4
PF3D7_0511500	1187.6	RNA pseudouridylate synthase, putative
PF3D7_0511800	69.1	inositol-3-phosphate synthase
PF3D7_0512600	22.9	ras-related protein Rab-1B
PF3D7_0513300	26.9	purine nucleoside phosphorylase
PF3D7_0513600	129.2	deoxyribodipyrimidine photo-lyase, putative
PF3D7_0515000	98.4	pre-mRNA-splicing factor CWC2, putative
PF3D7_0516200	16.1	40S ribosomal protein S11
PF3D7_0516700	156.3	ubiquitin carboxyl-terminal hydrolase 2, putative
PF3D7_0517000	18.1	60S ribosomal protein L12, putative
PF3D7_0517300	34.6	serine/arginine-rich splicing factor 1
PF3D7_0517400	132.7	FACT complex subunit SPT16, putative
PF3D7_0517700	84.1	eukaryotic translation initiation factor 3 subunit B, putative
PF3D7_0518300	27.3	proteasome subunit beta type-1, putative
PF3D7_0519400	15.4	40S ribosomal protein S24
PF3D7_0519700	22.7	FoP domain-containing protein, putative
PF3D7_0520000	22.1	40S ribosomal protein S9, putative
PF3D7_0520900	53.8	adenosylhomocysteinase
PF3D7_0523000	162.3	multidrug resistance protein 1
PF3D7_0524000	127.4	karyopherin beta
PF3D7_0525100	76.9	acyl-CoA synthetase
PF3D7_0525800	34.3	inner membrane complex protein 1g, putative
PF3D7_0527000	109.8	DNA replication licensing factor MCM3, putative
PF3D7_0527500	51.1	Hsc70-interacting protein
PF3D7_0528200	61.4	eukaryotic translation initiation factor 3 subunit E, putative
PF3D7_0532100	19	early transcribed membrane protein 5
PF3D7_0532300	60.2	Plasmodium exported protein (PHISTb), unknown function
PF3D7_0532400	61.1	lysine-rich membrane-associated PHISTb protein
PF3D7_0601900	14.7	conserved Plasmodium protein, unknown function
PF3D7_0602100	157.3	ATP-dependent RNA helicase, putative
PF3D7_0602600	153.7	SAC3 domain-containing protein, putative
PF3D7_0604500	334.4	conserved Plasmodium protein, unknown function
PF3D7_0605100	85.6	RNA-binding protein, putative
PF3D7_0605900	34.7	long chain polyunsaturated fatty acid elongation enzyme, putative
PF3D7_0606700	176.9	coatomer alpha subunit, putative
PF3D7_0607000	112.4	translation initiation factor IF-2, putative
PF3D7_0608500	26.5	proteasome subunit alpha type-2, putative
PF3D7_0608800	46.1	ornithine aminotransferase
PF3D7_0609000	720.5	conserved Plasmodium protein, unknown function
PF3D7_0610400	15.4	histone H3
PF3D7_0610800	75.8	transketolase
PF3D7_0610900	149.4	transcription elongation factor SPT5, putative
PF3D7_0611800	374.9	conserved Plasmodium protein, unknown function
PF3D7_0613300	172	rhoptry protein ROP14
PF3D7_0614300	97	major facilitator superfamily-related transporter, putative
PF3D7_0614500	21.6	60S ribosomal protein L19
PF3D7_0617000	43.6	mitochondrial import receptor subunit TOM40, putative
PF3D7_0617200	53	conserved Plasmodium protein, unknown function
PF3D7_0617900	15.4	histone H3 variant
PF3D7_0618000	92.8	conserved Plasmodium membrane protein, unknown function
PF3D7_0618300	16.7	60S ribosomal protein L27a, putative
PF3D7_0619400	92.4	cell division cycle protein 48 homologue, putative
PF3D7_0619500	163.9	acyl-CoA synthetase
PF3D7_0621200	33	pyridoxine biosynthesis protein PDX1
PF3D7_0622800	170.2	leucine--tRNA ligase, putative
PF3D7_0623100	91.1	nuclear polyadenylated RNA-binding protein NAB2, putative
PF3D7_0624000	55.3	hexokinase
PF3D7_0624600	315.6	SNF2 helicase, putative
PF3D7_0626800	55.7	pyruvate kinase
PF3D7_0627500	20.3	protein DJ-1
PF3D7_0627700	132.8	transportin
PF3D7_0628100	1206	HECT-domain (ubiquitin-transferase), putative
PF3D7_0628300	45.1	choline/ethanolaminephosphotransferase, putative
PF3D7_0629100	77.1	nicotinate phosphoribosyltransferase, putative
PF3D7_0629400	90.8	RNA-binding protein, putative
PF3D7_0629500	68.9	amino acid transporter, putative
PF3D7_0629700	796	SET domain protein, putative
PF3D7_0629800	136.3	cullin-like protein, putative
PF3D7_0702400	14.2	small exported membrane protein 1
PF3D7_0703500	264.9	erythrocyte membrane-associated antigen
PF3D7_0704300	217.5	conserved Plasmodium membrane protein, unknown function
PF3D7_0705700	6.4	40S ribosomal protein S29, putative
PF3D7_0706000	145.5	importin-7, putative
PF3D7_0706400	10.5	60S ribosomal protein L37
PF3D7_0706500	196.6	conserved Plasmodium protein, unknown function
PF3D7_0707300	103.6	rhoptry-associated membrane antigen
PF3D7_0707400	78.2	AAA family ATPase, putative
PF3D7_0708400	86.2	heat shock protein 90
PF3D7_0708800	100	heat shock protein 110
PF3D7_0711500	78.9	regulator of chromosome condensation, putative
PF3D7_0714000	13.8	histone H2B variant
PF3D7_0716300	60.6	conserved Plasmodium protein, unknown function
PF3D7_0716800	37.3	eukaryotic translation initiation factor 3 subunit I, putative
PF3D7_0719600	20.2	60S ribosomal protein L11a, putative
PF3D7_0720400	72.7	ferrodoxin reductase-like protein
PF3D7_0721100	29.3	conserved Plasmodium protein, unknown function
PF3D7_0721600	21.9	40S ribosomal protein S5, putative
PF3D7_0722200	87.9	rhoptry-associated leucine zipper-like protein 1
PF3D7_0722400	45.2	Obg-like ATPase 1, putative
PF3D7_0722600	70.2	U3 small nucleolar RNA-associated protein 7, putative
PF3D7_0723900	144.6	RNA-binding protein, putative
PF3D7_0724100	124.1	conserved Plasmodium protein, unknown function
PF3D7_0724600	243.6	protein kinase, putative
PF3D7_0726500	373.2	ubiquitin carboxyl-terminal hydrolase, putative
PF3D7_0727400	28.4	proteasome subunit alpha type-5, putative
PF3D7_0728000	37.8	eukaryotic translation initiation factor 2 subunit alpha, putative
PF3D7_0730900	244.2	EMP1-trafficking protein
PF3D7_0731300	37.7	Plasmodium exported protein (PHISTb), unknown function
PF3D7_0800100	241.5	erythrocyte membrane protein 1, PfEMP1
PF3D7_0801000	147.1	Plasmodium exported protein (PHISTc), unknown function
PF3D7_0801800	117.7	mannose-6-phosphate isomerase, putative
PF3D7_0802200	25.2	1-cys peroxiredoxin
PF3D7_0803800	30.9	proteasome subunit beta type-4
PF3D7_0804900	56.5	GTPase-activating protein, putative
PF3D7_0806800	123	V-type proton ATPase subunit a, putative
PF3D7_0807300	23.2	ras-related protein Rab-18
PF3D7_0807600	159	conserved Plasmodium protein, unknown function
PF3D7_0807800	55.1	26S proteasome regulatory subunit RPN10, putative
PF3D7_0810600	108.6	ATP-dependent RNA helicase DBP1, putative
PF3D7_0811600	144	conserved Plasmodium protein, unknown function
PF3D7_0812400	61.2	karyopherin alpha
PF3D7_0812500	117.1	RNA-binding protein, putative
PF3D7_0813300	36.3	conserved Plasmodium protein, unknown function
PF3D7_0813400	76.9	conserved Plasmodium protein, unknown function
PF3D7_0813900	16.3	40S ribosomal protein S16, putative
PF3D7_0814000	25.4	60S ribosomal protein L13-2, putative
PF3D7_0814200	27.3	DNA/RNA-binding protein Alba 1
PF3D7_0815600	31.3	eukaryotic translation initiation factor 3 subunit G, putative
PF3D7_0817300	254.8	conserved Plasmodium protein, unknown function
PF3D7_0817700	133.7	rhoptry neck protein 5
PF3D7_0817900	11.5	high mobility group protein B2
PF3D7_0818200	30.2	14-3-3 protein
PF3D7_0818900	73.9	heat shock protein 70
PF3D7_0819600	32.2	conserved Plasmodium protein, unknown function
PF3D7_0821400	14.1	conserved Plasmodium protein, unknown function
PF3D7_0821700	16.4	60S ribosomal protein L22, putative
PF3D7_0823200	32.4	RNA-binding protein, putative
PF3D7_0823300	170.9	histone acetyltransferase GCN5
PF3D7_0823800	76.7	DnaJ protein, putative
PF3D7_0824400	67.6	nucleoside transporter 2
PF3D7_0826700	35.7	receptor for activated c kinase
PF3D7_0827900	55.5	protein disulfide isomerase
PF3D7_0830500	80.4	sporozoite and liver stage tryptophan-rich protein, putative
PF3D7_0831400	36.4	Plasmodium exported protein, unknown function
PF3D7_0831600	165.6	cytoadherence linked asexual protein 8
PF3D7_0831700	75.1	heat shock protein 70
PF3D7_0900200	42	rifin
PF3D7_0903200	23.8	ras-related protein RAB7
PF3D7_0903400	300.9	ATP-dependent RNA helicase DDX60, putative
PF3D7_0903700	50.3	alpha tubulin 1
PF3D7_0904400	22.2	signal peptidase complex subunit 3, putative
PF3D7_0904800	56.2	replication protein A1, small fragment
PF3D7_0905100	235.5	nucleoporin NUP100/NSP100, putative
PF3D7_0905400	104.9	high molecular weight rhoptry protein 3
PF3D7_0912400	52.7	alkaline phosphatase, putative
PF3D7_0912500	33.2	SAP domain-containing protein, putative
PF3D7_0913200	32	elongation factor 1-beta
PF3D7_0914400	28.4	conserved Plasmodium protein, unknown function
PF3D7_0914700	58.4	major facilitator superfamily-related transporter, putative
PF3D7_0915400	159.5	ATP-dependent 6-phosphofructokinase
PF3D7_0916700	45.1	RNA-binding protein musashi, putative
PF3D7_0917900	72.4	heat shock protein 70
PF3D7_0918000	44.6	glideosome-associated protein 50
PF3D7_0918300	36.8	eukaryotic translation initiation factor 3 subunit F, putative
PF3D7_0918900	124.5	gamma-glutamylcysteine synthetase
PF3D7_0919000	31.8	nucleosome assembly protein
PF3D7_0919100	43.3	DnaJ protein, putative
PF3D7_0920800	56.2	inosine-5'-monophosphate dehydrogenase
PF3D7_0922100	182.1	ubiquitin-like protein, putative
PF3D7_0922200	44.8	S-adenosylmethionine synthetase
PF3D7_0922500	45.4	phosphoglycerate kinase
PF3D7_0923900	23	RNA-binding protein, putative
PF3D7_0929200	33.6	RNA-binding protein, putative
PF3D7_0929400	162.7	high molecular weight rhoptry protein 2
PF3D7_0930300	195.7	merozoite surface protein 1
PF3D7_0931100	97.9	nucleolar protein Nop52, putative
PF3D7_0931400	37.2	PUB domain-containing protein, putative
PF3D7_0932300	65.6	M18 aspartyl aminopeptidase
PF3D7_0934800	40.2	cAMP-dependent protein kinase catalytic subunit
PF3D7_0935800	160.4	cytoadherence linked asexual protein 9
PF3D7_0935900	83	ring-exported protein 1
PF3D7_0936000	10.8	ring-exported protein 2
PF3D7_0936800	45.5	Plasmodium exported protein (PHISTc), unknown function
PF3D7_1001500	11.3	early transcribed membrane protein 10.1
PF3D7_1002100	69.9	EMP1-trafficking protein
PF3D7_1002400	30.1	transformer-2 protein homolog beta, putative
PF3D7_1003600	32.7	inner membrane complex protein 1c, putative
PF3D7_1003800	142.9	U5 small nuclear ribonucleoprotein component, putative
PF3D7_1004000	23.8	60S ribosomal protein L13, putative
PF3D7_1004400	106.3	RNA-binding protein, putative
PF3D7_1006200	12	DNA/RNA-binding protein Alba 3
PF3D7_1006800	29.5	single-strand telomeric DNA-binding protein GBP2, putative
PF3D7_1007700	182.7	AP2 domain transcription factor AP2-I
PF3D7_1007900	63.1	eukaryotic translation initiation factor 3 subunit D, putative
PF3D7_1008100	453	zinc finger protein, putative
PF3D7_1008400	49.8	26S protease regulatory subunit 4, putative
PF3D7_1008800	53.4	nucleolar protein 5, putative
PF3D7_1008900	27.6	adenylate kinase
PF3D7_1010600	25.3	eukaryotic translation initiation factor 2 subunit beta
PF3D7_1010700	25.7	dolichyl-phosphate-mannose--protein mannosyltransferase, putative
PF3D7_1011800	131.6	PRE-binding protein
PF3D7_1012200	31.8	rhoptry associated adhesin
PF3D7_1012400	26.4	hypoxanthine-guanine phosphoribosyltransferase
PF3D7_1012600	63.9	GMP synthase [glutamine-hydrolyzing]
PF3D7_1012800	102.2	conserved Plasmodium protein, unknown function
PF3D7_1013300	75.5	conserved Plasmodium protein, unknown function
PF3D7_1014100	173.3	merozoite surface protein MSA180, putative
PF3D7_1015600	62.6	heat shock protein 60
PF3D7_1015900	48.7	enolase
PF3D7_1018500	12.5	pre-mRNA-splicing factor RDS3, putative
PF3D7_1019000	280.8	eukaryotic translation initiation factor subunit eIF2A, putative
PF3D7_1019400	11.8	60S ribosomal protein L30e, putative
PF3D7_1021900	267.4	PHAX domain-containing protein, putative
PF3D7_1022400	62.1	serine/arginine-rich splicing factor 4
PF3D7_1023900	381.3	chromodomain-helicase-DNA-binding protein 1 homolog, putative
PF3D7_1026800	29.9	40S ribosomal protein S2
PF3D7_1027300	43.9	peroxiredoxin
PF3D7_1027800	44.2	60S ribosomal protein L3
PF3D7_1029600	42.5	adenosine deaminase
PF3D7_1030100	149.4	pre-mRNA-splicing factor ATP-dependent RNA helicase PRP22, putative
PF3D7_1030500	46.8	26S proteasome regulatory subunit RPN9, putative
PF3D7_1033100	168.2	S-adenosylmethionine decarboxylase/ornithine decarboxylase
PF3D7_1033200	38.9	early transcribed membrane protein 10.2
PF3D7_1033400	32.8	haloacid dehalogenase-like hydrolase
PF3D7_1033700	55.9	bromodomain protein 1
PF3D7_1034900	104.2	methionine--tRNA ligase
PF3D7_1036900	192.7	conserved Plasmodium protein, unknown function
PF3D7_1037300	33.7	ADP/ATP transporter on adenylate translocase
PF3D7_1103100	13	60S acidic ribosomal protein P1, putative
PF3D7_1103800	391.9	CCR4-NOT transcription complex subunit 1, putative
PF3D7_1104200	167.4	chromatin remodeling protein
PF3D7_1104400	49.3	thioredoxin, putative
PF3D7_1105000	11.5	histone H4
PF3D7_1105100	13.1	histone H2B
PF3D7_1105400	29.8	40S ribosomal protein S4, putative
PF3D7_1105800	30.7	conserved Apicomplexan protein, unknown function
PF3D7_1107300	381.9	polyadenylate-binding protein-interacting protein 1, putative
PF3D7_1107400	38.6	DNA repair protein RAD51
PF3D7_1107800	206.9	AP2 domain transcription factor, putative
PF3D7_1108400	39.9	casein kinase 2, alpha subunit
PF3D7_1108600	39.4	endoplasmic reticulum-resident calcium binding protein
PF3D7_1108700	62.4	heat shock protein J2
PF3D7_1109900	12.8	60S ribosomal protein L36
PF3D7_1110200	152.2	pre-mRNA-processing factor 6, putative
PF3D7_1110400	173.9	RNA-binding protein, putative
PF3D7_1115600	21.7	peptidyl-prolyl cis-trans isomerase
PF3D7_1115800	33.9	conserved Plasmodium protein, unknown function
PF3D7_1116400	56.5	guanine nucleotide-exchange factor SEC12
PF3D7_1116800	102.9	heat shock protein 101
PF3D7_1117300	15.3	conserved Plasmodium protein, unknown function
PF3D7_1117700	24.9	GTP-binding nuclear protein RAN/TC4
PF3D7_1118200	108.5	heat shock protein 90, putative
PF3D7_1119800	23.7	alternative splicing factor ASF-1, putative
PF3D7_1120000	129	conserved Plasmodium protein, unknown function
PF3D7_1120100	28.8	phosphoglycerate mutase, putative
PF3D7_1121600	17.3	exported protein 1
PF3D7_1124600	49.9	ethanolamine kinase
PF3D7_1124800	29.8	ribosome biogenesis regulatory protein, putative
PF3D7_1124900	14.7	60S ribosomal protein L35, putative
PF3D7_1125500	14.3	small nuclear ribonucleoprotein Sm D1, putative
PF3D7_1126200	17.9	40S ribosomal protein S18, putative
PF3D7_1128200	15.5	multiprotein-bridging factor 1, putative
PF3D7_1129000	36.6	spermidine synthase
PF3D7_1129100	52	parasitophorous vacuolar protein 1
PF3D7_1129200	46.6	26S proteasome regulatory subunit RPN7, putative
PF3D7_1129900	70.1	major facilitator superfamily-related transporter, putative
PF3D7_1130200	35	60S ribosomal protein P0
PF3D7_1130400	49.5	26S protease regulatory subunit 6A, putative
PF3D7_1132200	60.3	T-complex protein 1 subunit alpha
PF3D7_1132300	31.7	nucleic acid binding protein, putative
PF3D7_1134000	73.3	heat shock protein 70
PF3D7_1134700	175.5	DNA-directed RNA polymerase I subunit RPA2, putative
PF3D7_1135900	35.5	3-oxo-5-alpha-steroid 4-dehydrogenase, putative
PF3D7_1136300	128.5	tudor staphylococcal nuclease
PF3D7_1136400	107.1	signal recognition particle subunit SRP72, putative
PF3D7_1137300	81.6	CLPTM1 domain-containing protein, putative
PF3D7_1138500	105.4	protein phosphatase PPM2
PF3D7_1138800	222.1	WD repeat-containing protein, putative
PF3D7_1139900	23.2	conserved protein, unknown function
PF3D7_1140200	52.6	conserved Plasmodium protein, unknown function
PF3D7_1142500	14.4	60S ribosomal protein L28
PF3D7_1142600	16.3	60S ribosomal protein L35ae, putative
PF3D7_1143400	17.9	translation initiation factor eIF-1A, putative
PF3D7_1144000	9.1	40S ribosomal protein S21
PF3D7_1144600	36.7	transcription initiation factor IIF subunit beta, putative
PF3D7_1145100	124.4	coatomer subunit gamma, putative
PF3D7_1145400	96.4	dynamin-like protein
PF3D7_1148700	43.8	Plasmodium exported protein (PHISTc), unknown function
PF3D7_1149000	689.3	antigen 332, DBL-like protein
PF3D7_1149200	126.9	ring-infected erythrocyte surface antigen
PF3D7_1149400	25.4	Plasmodium exported protein, unknown function
PF3D7_1200200	42	rifin
PF3D7_1201000	77.1	Plasmodium exported protein (PHISTb), unknown function
PF3D7_1202900	11.3	high mobility group protein B1
PF3D7_1203700	40.5	nucleosome assembly protein
PF3D7_1204300	17.6	eukaryotic translation initiation factor 5A
PF3D7_1205600	39	tetratricopeptide repeat protein, putative
PF3D7_1206200	116	eukaryotic translation initiation factor 3 subunit C, putative
PF3D7_1207100	100.2	small subunit rRNA processing factor, putative
PF3D7_1210600	122.9	conserved Plasmodium protein, unknown function
PF3D7_1211400	28.1	heat shock protein DNAJ homologue Pfj4
PF3D7_1211900	140.3	non-SERCA-type Ca2+ -transporting P-ATPase
PF3D7_1212700	166.1	eukaryotic translation initiation factor 3 subunit A, putative
PF3D7_1213800	86.6	proline--tRNA ligase
PF3D7_1216200	41.2	glycerol-3-phosphate dehydrogenase [NAD(+)], putative
PF3D7_1216900	111.1	DNA-binding chaperone, putative
PF3D7_1218500	122.8	dynamin-like protein, putative
PF3D7_1219100	232.9	clathrin heavy chain, putative
PF3D7_1220900	31	heterochromatin protein 1
PF3D7_1222300	95	endoplasmin, putative
PF3D7_1223100	50.8	cAMP-dependent protein kinase regulatory subunit
PF3D7_1224300	97.2	polyadenylate-binding protein, putative
PF3D7_1225200	138.1	conserved Plasmodium protein, unknown function
PF3D7_1225800	131.8	ubiquitin-activating enzyme E1
PF3D7_1226300	33.3	haloacid dehalogenase-like hydrolase, putative
PF3D7_1228600	86.6	merozoite surface protein 9
PF3D7_1229300	117.5	conserved Plasmodium protein, unknown function
PF3D7_1229400	12.8	macrophage migration inhibitory factor
PF3D7_1229500	60.7	T-complex protein 1 subunit gamma
PF3D7_1230800	71.3	pre-mRNA-splicing regulator, putative
PF3D7_1231100	24.4	ras-related protein Rab-2
PF3D7_1232100	81.5	60 kDa chaperonin
PF3D7_1235600	49.8	serine hydroxymethyltransferase
PF3D7_1235700	58.4	ATP synthase subunit beta, mitochondrial
PF3D7_1236100	51.5	clustered-asparagine-rich protein
PF3D7_1237700	23.7	conserved protein, unknown function
PF3D7_1238800	92.1	acyl-CoA synthetase
PF3D7_1242700	16.1	40S ribosomal protein S17, putative
PF3D7_1242800	52.3	rab specific GDP dissociation inhibitor
PF3D7_1244100	154.9	N-alpha-acetyltransferase 15, NatA auxiliary subunit, putative
PF3D7_1246200	41.9	actin I
PF3D7_1247400	34.8	peptidyl-prolyl cis-trans isomerase FKBP35
PF3D7_1248700	231.3	conserved Plasmodium protein, unknown function
PF3D7_1248900	49.5	26S protease regulatory subunit 8, putative
PF3D7_1249100	44.8	conserved Plasmodium protein, unknown function
PF3D7_1252100	263.2	rhoptry neck protein 3
PF3D7_1301700	28.3	CX3CL1-binding protein 2
PF3D7_1302000	36.5	EMP1-trafficking protein
PF3D7_1302800	22.5	40S ribosomal protein S7, putative
PF3D7_1304100	104.5	DNA ligase I
PF3D7_1304500	25.2	small heat shock protein, putative
PF3D7_1306600	53.8	V-type proton ATPase subunit H, putative
PF3D7_1308200	273.4	carbamoyl phosphate synthetase
PF3D7_1309100	19.2	60S ribosomal protein L24, putative
PF3D7_1311500	46.8	26S protease regulatory subunit 7, putative
PF3D7_1311800	126.1	M1-family alanyl aminopeptidase
PF3D7_1311900	68.6	V-type proton ATPase catalytic subunit A
PF3D7_1312900	146.6	eukaryotic translation initation factor 4 gamma
PF3D7_1315700	37.2	tRNA (adenine(58)-N(1))-methyltransferase catalytic subunit TRM61, putative
PF3D7_1316800	34.5	protein transport protein SEC20, putative
PF3D7_1317800	16.8	40S ribosomal protein S19
PF3D7_1318800	75.9	translocation protein SEC63, putative
PF3D7_1319200	103.9	conserved Plasmodium protein, unknown function
PF3D7_1319300	94.8	tRNA (guanine(26)-N(2))-dimethyltransferase, putative
PF3D7_1320000	149.2	golgi protein 1
PF3D7_1320600	24.8	ras-related protein Rab-11A
PF3D7_1323100	21.6	60S ribosomal protein L6, putative
PF3D7_1323200	14.2	V-type proton ATPase subunit G, putative
PF3D7_1323400	22.1	60S ribosomal protein L23
PF3D7_1324900	34.1	L-lactate dehydrogenase
PF3D7_1325100	49.4	phosphoribosylpyrophosphate synthetase
PF3D7_1327800	64	ribose-phosphate pyrophosphokinase, putative
PF3D7_1328100	30	proteasome subunit beta type-7, putative
PF3D7_1328300	38.8	conserved Plasmodium protein, unknown function
PF3D7_1329100	250.3	myosin F, putative
PF3D7_1329500	218.4	conserved Plasmodium protein, unknown function
PF3D7_1330800	68	RNA-binding protein, putative
PF3D7_1332900	151.3	isoleucine--tRNA ligase, putative
PF3D7_1334200	62.7	chaperone binding protein, putative
PF3D7_1334500	70.7	MSP7-like protein
PF3D7_1335100	41.3	merozoite surface protein 7
PF3D7_1336800	46	nuclear movement protein, putative
PF3D7_1338100	59.1	26S proteasome regulatory subunit RPN3, putative
PF3D7_1338200	25.5	60S ribosomal protein L6-2, putative
PF3D7_1338300	47.8	elongation factor 1-gamma, putative
PF3D7_1340300	114.3	nucleolar complex protein 2, putative
PF3D7_1341200	21.7	60S ribosomal protein L18, putative
PF3D7_1342000	35.4	40S ribosomal protein S6
PF3D7_1342600	92.3	myosin A
PF3D7_1343000	31	phosphoethanolamine N-methyltransferase
PF3D7_1344200	108.2	heat shock protein 110, putative
PF3D7_1344800	43.3	aspartate carbamoyltransferase
PF3D7_1346300	25	DNA/RNA-binding protein Alba 2
PF3D7_1347200	47.6	nucleoside transporter 1
PF3D7_1347500	42.2	DNA/RNA-binding protein Alba 4
PF3D7_1349200	101.4	glutamate--tRNA ligase, putative
PF3D7_1350100	67.6	lysine--tRNA ligase
PF3D7_1351400	23.4	60S ribosomal protein L17, putative
PF3D7_1351700	151.5	inner membrane complex protein 1f, putative
PF3D7_1352500	24	thioredoxin-related protein, putative
PF3D7_1353100	32.8	Plasmodium exported protein, unknown function
PF3D7_1353200	15.8	membrane associated histidine-rich protein
PF3D7_1353800	27.9	proteasome subunit alpha type-4, putative
PF3D7_1353900	27.2	proteasome subunit alpha type-7, putative
PF3D7_1354300	120.3	large subunit rRNA methyltransferase, putative
PF3D7_1354500	50.1	adenylosuccinate synthetase
PF3D7_1355700	151.5	NLI interacting factor-like phosphatase, putative
PF3D7_1357000	49	elongation factor 1-alpha
PF3D7_1357800	58	T-complex protein 1 subunit delta
PF3D7_1358700	18.4	YOP1-like protein, putative
PF3D7_1358800	17.3	40S ribosomal protein S15
PF3D7_1359400	57.1	CUGBP Elav-like family member 1
PF3D7_1360800	138.9	falcilysin
PF3D7_1360900	44.8	RNA-binding protein, putative
PF3D7_1361900	30.6	proliferating cell nuclear antigen 1
PF3D7_1362200	54.6	RuvB-like helicase 3
PF3D7_1364100	92.7	6-cysteine protein
PF3D7_1366300	494.7	conserved Plasmodium protein, unknown function
PF3D7_1366900	78.6	conserved Plasmodium protein, unknown function
PF3D7_1367700	165.1	alanine--tRNA ligase
PF3D7_1368100	35.2	26S proteasome regulatory subunit RPN11, putative
PF3D7_1368200	70.3	ABC transporter E family member 1, putative
PF3D7_1401200	31.3	Plasmodium exported protein, unknown function
PF3D7_1401400	11.4	early transcribed membrane protein 14.1
PF3D7_1402300	78.4	26S proteasome regulatory subunit RPN6
PF3D7_1405900	130.8	RNA-binding protein, putative
PF3D7_1406900	42.3	radical SAM protein, putative
PF3D7_1407100	34.1	rRNA 2'-O-methyltransferase fibrillarin, putative
PF3D7_1407800	51	plasmepsin IV
PF3D7_1407900	51.5	plasmepsin I
PF3D7_1408000	51.5	plasmepsin II
PF3D7_1408100	51.7	plasmepsin III
PF3D7_1408600	25.1	40S ribosomal protein S8e, putative
PF3D7_1410400	90.1	rhoptry-associated protein 1
PF3D7_1410600	51.2	eukaryotic translation initiation factor 2 subunit gamma, putative
PF3D7_1410700	39.8	conserved Plasmodium protein, unknown function
PF3D7_1414300	25.2	60S ribosomal protein L10, putative
PF3D7_1415400	178.5	conserved Plasmodium protein, unknown function
PF3D7_1416100	110.6	protein SEY1, putative
PF3D7_1417500	52.9	H/ACA ribonucleoprotein complex subunit 4, putative
PF3D7_1417800	111.5	DNA replication licensing factor MCM2
PF3D7_1419400	262.3	conserved Plasmodium membrane protein, unknown function
PF3D7_1421200	11.7	40S ribosomal protein S25
PF3D7_1423700	183.6	conserved Plasmodium protein, unknown function
PF3D7_1424100	34	60S ribosomal protein L5, putative
PF3D7_1424400	32.7	60S ribosomal protein L7-3, putative
PF3D7_1426000	18.8	60S ribosomal protein L21
PF3D7_1426100	19.4	transcription factor BTF3, putative
PF3D7_1427300	175.8	conserved Plasmodium protein, unknown function
PF3D7_1427500	94.7	DNA mismatch repair protein MSH2, putative
PF3D7_1427900	33	leucine-rich repeat protein
PF3D7_1428300	42.6	proliferation-associated protein 2g4, putative
PF3D7_1429800	160	coatomer subunit beta, putative
PF3D7_1431700	19.3	60S ribosomal protein L14, putative
PF3D7_1432100	33.3	voltage-dependent anion-selective channel protein, putative
PF3D7_1433500	169.2	DNA topoisomerase 2
PF3D7_1434300	66.1	Hsp70/Hsp90 organizing protein
PF3D7_1434600	71.7	methionine aminopeptidase 2
PF3D7_1434800	28.9	mitochondrial acidic protein MAM33, putative
PF3D7_1435400	21.8	ER membrane protein complex subunit 4, putative
PF3D7_1436000	67.4	glucose-6-phosphate isomerase
PF3D7_1436300	112.4	translocon component PTEX150
PF3D7_1437000	64.2	N-acetyltransferase, putative
PF3D7_1437900	48.5	HSP40, subfamily A
PF3D7_1438900	21.8	thioredoxin peroxidase 1
PF3D7_1439800	27.7	vesicle-associated membrane protein, putative
PF3D7_1439900	27.9	triosephosphate isomerase
PF3D7_1441200	24.8	60S ribosomal protein L1, putative
PF3D7_1444800	40.1	fructose-bisphosphate aldolase
PF3D7_1445700	41.9	conserved Plasmodium protein, unknown function
PF3D7_1445900	60	ATP-dependent RNA helicase DDX5, putative
PF3D7_1446200	67.8	M17 leucyl aminopeptidase
PF3D7_1446500	346.9	conserved Plasmodium protein, unknown function
PF3D7_1447000	30	40S ribosomal protein S5
PF3D7_1447900	119	multidrug resistance protein 2
PF3D7_1450500	199.7	conserved Plasmodium protein, unknown function
PF3D7_1451100	93.5	elongation factor 2
PF3D7_1451800	102.3	sortilin
PF3D7_1452000	249.5	rhoptry neck protein 2
PF3D7_1454400	90.1	aminopeptidase P
PF3D7_1454700	53	6-phosphogluconate dehydrogenase, decarboxylating, putative
PF3D7_1455300	69.5	conserved Plasmodium protein, unknown function
PF3D7_1456800	76.4	V-type H(+)-translocating pyrophosphatase, putative
PF3D7_1457000	47.6	signal peptide peptidase
PF3D7_1457300	76	conserved Plasmodium protein, unknown function
PF3D7_1458600	139.6	conserved Plasmodium protein, unknown function
PF3D7_1459000	84.3	ATP-dependent RNA helicase DBP5
PF3D7_1459400	40.1	conserved Plasmodium protein, unknown function
PF3D7_1460700	16.7	60S ribosomal protein L27
PF3D7_1461400	37	conserved Plasmodium protein, unknown function
PF3D7_1461900	128.1	valine--tRNA ligase, putative
PF3D7_1462300	161.2	GTP-binding protein, putative
PF3D7_1462800	36.6	glyceraldehyde-3-phosphate dehydrogenase
PF3D7_1464600	170.5	serine/threonine protein phosphatase UIS2, putative
PF3D7_1465900	24.7	40S ribosomal protein S3
PF3D7_1466300	132.8	26S proteasome regulatory subunit RPN2, putative
PF3D7_1468100	295.8	conserved Plasmodium protein, unknown function
PF3D7_1468700	45.3	eukaryotic initiation factor 4A
PF3D7_1468900	97.3	conserved Plasmodium protein, unknown function
PF3D7_1471100	33.4	exported protein 2
PF3D7_1473200	52.5	DnaJ protein, putative
PF3D7_1474800	28.8	proteasome subunit alpha type-1, putative
PF3D7_1476300	68.1	Plasmodium exported protein (PHISTb), unknown function
PF3D7_1478600	143.8	EMP1-trafficking protein

## Sheet: Table S2 legend
Total number of P. falciparum proteins detected by LC-MS/MS. Protein molecular weight (MW) in kilodaltons (kDa) are provided for all proteins. Genes and their predicted products are listed. Only proteins with at least three peptides in all replicates are shown. Four replicates were used for all samples.
