# Supplementary material for: Discovery of RUF6 ncRNA–interacting proteins involved in P. falciparum immune evasion
Source: Life Sci Alliance. 2022 Nov 15;6(1):e202201577. doi: 10.26508/lsa.202201577 (PMC9670795; doi:10.26508/lsa.202201577)
Supplement: Supplementary file 5 [file LSA-2022-01577_TableS4.xlsx]

## Sheet: S4 table
Table S4: Label-free quantitative LC-MS/MS analysis of ChIRP RUF6 targeted - versus ChIRP RNase treated control (all P. falciparum proteins detected with FDR ≤ 1%, ≥ 3 peptides in all replicates, ratio ≥ 2.0, p ≤ 0.05)
202 proteins	Targeted Probes/RNase						Total peptides in set	MW (kDa)	Description
	Ratio	Log2(Ratio)	Adj. p-value	CV %	Dist. pept. used	Pept. used
PF3D7_0201900	2.99143	1.58084	0.000753848	17.3134	8	36	58	273.6	erythrocyte membrane protein 3
PF3D7_1027300	3.67329	1.87707	0.0266378	23.1083	8	27	44	43.9	peroxiredoxin
PF3D7_1476300	1000	1000			14	21	21	68.1	Plasmodium exported protein (PHISTb), unknown function
PF3D7_0604500	1000	1000			14	20	20	334.4	conserved Plasmodium protein, unknown function
PF3D7_0935800	1000	1000			9	19	19	160.4	cytoadherence linked asexual protein 9
PF3D7_1330800	4.9199	2.29863	0.0094411	17.4783	5	18	28	68	RNA-binding protein, putative
PF3D7_0817700	1000	1000			10	17	17	133.7	rhoptry neck protein 5
PF3D7_1311900	1000	1000			9	17	17	68.6	V-type proton ATPase catalytic subunit A
PF3D7_1445900	1000	1000			9	17	17	60	ATP-dependent RNA helicase DDX5, putative
PF3D7_1232100	1000	1000			8	16	16	81.5	60 kDa chaperonin
PF3D7_1421200	1000	1000			6	16	16	11.7	40S ribosomal protein S25
PF3D7_0402100	1000	1000			10	15	15	67.8	Plasmodium exported protein (PHISTb), unknown function
PF3D7_0916700	1000	1000			6	15	15	45.1	RNA-binding protein musashi, putative
PF3D7_1223100	1000	1000			5	15	15	50.8	cAMP-dependent protein kinase regulatory subunit
PF3D7_1312900	1000	1000			8	15	15	146.6	eukaryotic translation initation factor 4 gamma
PF3D7_0318200	1000	1000			8	14	14	278.7	DNA-directed RNA polymerase II subunit RPB1
PF3D7_0722200	1000	1000			7	14	14	87.9	rhoptry-associated leucine zipper-like protein 1
PF3D7_0813400	1000	1000			8	14	14	76.9	conserved Plasmodium protein, unknown function
PF3D7_1308200	1000	1000			10	14	14	273.4	carbamoyl phosphate synthetase
PF3D7_0605100	1000	1000			8	13	13	85.6	RNA-binding protein, putative
PF3D7_1023900	1000	1000			5	13	13	381.3	chromodomain-helicase-DNA-binding protein 1 homolog, putative
PF3D7_0512600	1000	1000			4	12	12	22.9	ras-related protein Rab-1B
PF3D7_0624600	1000	1000			7	12	12	315.6	SNF2 helicase, putative
PF3D7_0730900	1000	1000			7	12	12	244.2	EMP1-trafficking protein
PF3D7_0830500	1000	1000			6	12	12	80.4	sporozoite and liver stage tryptophan-rich protein, putative
PF3D7_1351400	1000	1000			5	12	12	23.4	60S ribosomal protein L17, putative
PF3D7_1433500	1000	1000			6	12	12	169.2	DNA topoisomerase 2
PF3D7_0209800	1000	1000			4	11	11	52.2	ATP-dependent RNA helicase UAP56
PF3D7_0420300	1000	1000			5	11	11	400.2	AP2 domain transcription factor, putative
PF3D7_0706000	1000	1000			6	11	11	145.5	importin-7, putative
PF3D7_0831700	1000	1000			4	11	11	75.1	heat shock protein 70
PF3D7_1003600	1000	1000			8	11	11	32.7	inner membrane complex protein 1c, putative
PF3D7_1022400	1000	1000			4	11	11	62.1	serine/arginine-rich splicing factor 4
PF3D7_1034900	1000	1000			7	11	11	104.2	methionine--tRNA ligase
PF3D7_1219100	1000	1000			6	11	11	232.9	clathrin heavy chain, putative
PF3D7_1338300	1000	1000			7	11	11	47.8	elongation factor 1-gamma, putative
PF3D7_1362200	1000	1000			6	11	11	54.6	RuvB-like helicase 3
PF3D7_1431700	1000	1000			5	11	11	19.3	60S ribosomal protein L14, putative
PF3D7_0202400	1000	1000			7	10	10	141.8	translation-enhancing factor
PF3D7_0517400	1000	1000			4	10	10	132.7	FACT complex subunit SPT16, putative
PF3D7_0610900	1000	1000			6	10	10	149.4	transcription elongation factor SPT5, putative
PF3D7_0812500	1000	1000			3	10	10	117.1	RNA-binding protein, putative
PF3D7_1445700	1000	1000			7	10	10	41.9	conserved Plasmodium protein, unknown function
PF3D7_1473200	1000	1000			4	10	10	52.5	DnaJ protein, putative
PF3D7_0106100	1000	1000			6	9	9	45.3	V-type proton ATPase subunit C, putative
PF3D7_0201800	1000	1000			4	9	9	48.3	knob associated heat shock protein 40
PF3D7_0418200	1000	1000			6	9	9	51	eukaryotic translation initiation factor 3 subunit M, putative
PF3D7_0519700	1000	1000			4	9	9	22.7	FoP domain-containing protein, putative
PF3D7_0610400	1000	1000			4	9	9	15.4	histone H3
PF3D7_0721100	1000	1000			5	9	9	29.3	conserved Plasmodium protein, unknown function
PF3D7_0817900	1000	1000			4	9	9	11.5	high mobility group protein B2
PF3D7_0823300	1000	1000			3	9	9	170.9	histone acetyltransferase GCN5
PF3D7_0923900	1000	1000			5	9	9	23	RNA-binding protein, putative
PF3D7_1006200	1000	1000			4	9	9	12	DNA/RNA-binding protein Alba 3
PF3D7_1248700	1000	1000			4	9	9	231.3	conserved Plasmodium protein, unknown function
PF3D7_0103900	1000	1000			4	8	8	67.8	parasite-infected erythrocyte surface protein
PF3D7_0413600	1000	1000			4	8	8	44.7	26S protease regulatory subunit 6B, putative
PF3D7_0618000	1000	1000			4	8	8	92.8	conserved Plasmodium membrane protein, unknown function
PF3D7_0728000	1000	1000			5	8	8	37.8	eukaryotic translation initiation factor 2 subunit alpha, putative
PF3D7_0919100	1000	1000			4	8	8	43.3	DnaJ protein, putative
PF3D7_1128200	1000	1000			5	8	8	15.5	multiprotein-bridging factor 1, putative
PF3D7_1145400	1000	1000			6	8	8	96.4	dynamin-like protein
PF3D7_1231100	1000	1000			6	8	8	24.4	ras-related protein Rab-2
PF3D7_1358800	1000	1000			4	8	8	17.3	40S ribosomal protein S15
PF3D7_1367700	1000	1000			5	8	8	165.1	alanine--tRNA ligase
PF3D7_1468100	1000	1000			5	8	8	295.8	conserved Plasmodium protein, unknown function
PF3D7_0113900	1000	1000			4	7	7	28.2	CX3CL1-binding protein 1
PF3D7_0807600	1000	1000			3	7	7	159	conserved Plasmodium protein, unknown function
PF3D7_0934800	1000	1000			5	7	7	40.2	cAMP-dependent protein kinase catalytic subunit
PF3D7_1003800	1000	1000			5	7	7	142.9	U5 small nuclear ribonucleoprotein component, putative
PF3D7_1030100	1000	1000			2	7	7	149.4	pre-mRNA-splicing factor ATP-dependent RNA helicase PRP22, putative
PF3D7_1104200	1000	1000			4	7	7	167.4	chromatin remodeling protein
PF3D7_1118200	1000	1000			5	7	7	108.5	heat shock protein 90, putative
PF3D7_1124600	1000	1000			6	7	7	49.9	ethanolamine kinase
PF3D7_1132300	1000	1000			4	7	7	31.7	nucleic acid binding protein, putative
PF3D7_1149000	1000	1000			6	7	7	689.3	antigen 332, DBL-like protein
PF3D7_1207100	1000	1000			3	7	7	100.2	small subunit rRNA processing factor, putative
PF3D7_1344800	1000	1000			4	7	7	43.3	aspartate carbamoyltransferase
PF3D7_1351700	1000	1000			5	7	7	151.5	inner membrane complex protein 1f, putative
PF3D7_1464600	1000	1000			4	7	7	170.5	serine/threonine protein phosphatase UIS2, putative
PF3D7_1478600	1000	1000			6	7	7	143.8	EMP1-trafficking protein
PF3D7_0623100	1000	1000			3	6	6	91.1	nuclear polyadenylated RNA-binding protein NAB2, putative
PF3D7_0919000	1000	1000			4	6	6	31.8	nucleosome assembly protein
PF3D7_1110200	1000	1000			2	6	6	152.2	pre-mRNA-processing factor 6, putative
PF3D7_1149400	1000	1000			4	6	6	25.4	Plasmodium exported protein, unknown function
PF3D7_1218500	1000	1000			5	6	6	122.8	dynamin-like protein, putative
PF3D7_1302800	1000	1000			5	6	6	22.5	40S ribosomal protein S7, putative
PF3D7_1329500	1000	1000			3	6	6	218.4	conserved Plasmodium protein, unknown function
PF3D7_1353200	1000	1000			2	6	6	15.8	membrane associated histidine-rich protein
PF3D7_1438900	1000	1000			3	6	6	21.8	thioredoxin peroxidase 1
PF3D7_1474800	1000	1000			4	6	6	28.8	proteasome subunit alpha type-1, putative
PF3D7_0205900	1000	1000			4	5	5	108.4	26S proteasome regulatory subunit RPN1, putative
PF3D7_0219600	1000	1000			3	5	5	104.2	replication factor C subunit 1, putative
PF3D7_0310400	1000	1000			3	5	5	154.1	parasite-infected erythrocyte surface protein
PF3D7_0315100	1000	1000			3	5	5	26.9	eukaryotic translation initiation factor 4E
PF3D7_0527000	1000	1000			3	5	5	109.8	DNA replication licensing factor MCM3, putative
PF3D7_0609000	1000	1000			3	5	5	720.5	conserved Plasmodium protein, unknown function
PF3D7_0622800	1000	1000			3	5	5	170.2	leucine--tRNA ligase, putative
PF3D7_0817300	1000	1000			4	5	5	254.8	conserved Plasmodium protein, unknown function
PF3D7_0831400	1000	1000			2	5	5	36.4	Plasmodium exported protein, unknown function
PF3D7_0932300	1000	1000			4	5	5	65.6	M18 aspartyl aminopeptidase
PF3D7_1026800	1000	1000			3	5	5	29.9	40S ribosomal protein S2
PF3D7_1116400	1000	1000			4	5	5	56.5	guanine nucleotide-exchange factor SEC12
PF3D7_1120000	1000	1000			4	5	5	129	conserved Plasmodium protein, unknown function
PF3D7_1211400	1000	1000			4	5	5	28.1	heat shock protein DNAJ homologue Pfj4
PF3D7_1235700	1000	1000			3	5	5	58.4	ATP synthase subunit beta, mitochondrial
PF3D7_1341200	1000	1000			4	5	5	21.7	60S ribosomal protein L18, putative
PF3D7_1347200	1000	1000			2	5	5	47.6	nucleoside transporter 1
PF3D7_1350100	1000	1000			3	5	5	67.6	lysine--tRNA ligase
PF3D7_1366300	1000	1000			2	5	5	494.7	conserved Plasmodium protein, unknown function
PF3D7_1405900	1000	1000			3	5	5	130.8	RNA-binding protein, putative
PF3D7_1417800	1000	1000			4	5	5	111.5	DNA replication licensing factor MCM2
PF3D7_1459000	1000	1000			4	5	5	84.3	ATP-dependent RNA helicase DBP5
PF3D7_0214100	1000	1000			2	4	4	166.7	protein transport protein SEC31
PF3D7_0302500	1000	1000			2	4	4	167.2	cytoadherence linked asexual protein 3.1
PF3D7_0306200	1000	1000			3	4	4	41.6	activator of Hsp90 ATPase
PF3D7_0309500	1000	1000			2	4	4	69.9	asparagine synthetase [glutamine-hydrolyzing], putative
PF3D7_0407800	1000	1000			3	4	4	230.1	conserved Plasmodium protein, unknown function
PF3D7_0602600	1000	1000			1	4	4	153.7	SAC3 domain-containing protein, putative
PF3D7_0628100	1000	1000			1	4	4	1206	HECT-domain (ubiquitin-transferase), putative
PF3D7_0629100	1000	1000			3	4	4	77.1	nicotinate phosphoribosyltransferase, putative
PF3D7_0716300	1000	1000			3	4	4	60.6	conserved Plasmodium protein, unknown function
PF3D7_0722600	1000	1000			1	4	4	70.2	U3 small nucleolar RNA-associated protein 7, putative
PF3D7_0724100	1000	1000			1	4	4	124.1	conserved Plasmodium protein, unknown function
PF3D7_0804900	1000	1000			4	4	4	56.5	GTPase-activating protein, putative
PF3D7_0900200	1000	1000			2	4	4	42	rifin
PF3D7_0922100	1000	1000			3	4	4	182.1	ubiquitin-like protein, putative
PF3D7_1010600	1000	1000			2	4	4	25.3	eukaryotic translation initiation factor 2 subunit beta
PF3D7_1019000	1000	1000			3	4	4	280.8	eukaryotic translation initiation factor subunit eIF2A, putative
PF3D7_1033100	1000	1000			3	4	4	168.2	S-adenosylmethionine decarboxylase/ornithine decarboxylase
PF3D7_1103800	1000	1000			3	4	4	391.9	CCR4-NOT transcription complex subunit 1, putative
PF3D7_1129900	1000	1000			3	4	4	70.1	major facilitator superfamily-related transporter, putative
PF3D7_1130400	1000	1000			3	4	4	49.5	26S protease regulatory subunit 6A, putative
PF3D7_1138800	1000	1000			1	4	4	222.1	WD repeat-containing protein, putative
PF3D7_1142600	1000	1000			2	4	4	16.3	60S ribosomal protein L35ae, putative
PF3D7_1225200	1000	1000			1	4	4	138.1	conserved Plasmodium protein, unknown function
PF3D7_1225800	1000	1000			3	4	4	131.8	ubiquitin-activating enzyme E1
PF3D7_1230800	1000	1000			3	4	4	71.3	pre-mRNA-splicing regulator, putative
PF3D7_1306600	1000	1000			2	4	4	53.8	V-type proton ATPase subunit H, putative
PF3D7_1319300	1000	1000			3	4	4	94.8	tRNA (guanine(26)-N(2))-dimethyltransferase, putative
PF3D7_1334500	1000	1000			4	4	4	70.7	MSP7-like protein
PF3D7_1427900	1000	1000			4	4	4	33	leucine-rich repeat protein
PF3D7_1446500	1000	1000			3	4	4	346.9	conserved Plasmodium protein, unknown function
PF3D7_1451800	1000	1000			3	4	4	102.3	sortilin
PF3D7_1462300	1000	1000			3	4	4	161.2	GTP-binding protein, putative
PF3D7_0106800	1000	1000			3	3	3	24.3	ras-related protein Rab-5C
PF3D7_0113200	1000	1000			2	3	3	70.1	Plasmodium exported protein, unknown function
PF3D7_0113300	1000	1000			1	3	3	71	Plasmodium exported protein (hyp1), unknown function
PF3D7_0205500	1000	1000			1	3	3	15.1	DNA-directed RNA polymerase II 16 kDa subunit, putative
PF3D7_0308600	1000	1000			1	3	3	60.8	pre-mRNA-processing factor 19, putative
PF3D7_0310200	1000	1000			1	3	3	534.1	phd finger protein, putative
PF3D7_0405500	1000	1000			1	3	3	26.9	conserved Plasmodium protein, unknown function
PF3D7_0409000	1000	1000			1	3	3	312.5	conserved Plasmodium protein, unknown function
PF3D7_0412700	1000	1000			2	3	3	256.1	erythrocyte membrane protein 1, PfEMP1
PF3D7_0501500	1000	1000			2	3	3	47	rhoptry-associated protein 3
PF3D7_0502400	1000	1000			2	3	3	69.4	merozoite surface protein 8
PF3D7_0513600	1000	1000			2	3	3	129.2	deoxyribodipyrimidine photo-lyase, putative
PF3D7_0528200	1000	1000			2	3	3	61.4	eukaryotic translation initiation factor 3 subunit E, putative
PF3D7_0605900	1000	1000			2	3	3	34.7	long chain polyunsaturated fatty acid elongation enzyme, putative
PF3D7_0611800	1000	1000			1	3	3	374.9	conserved Plasmodium protein, unknown function
PF3D7_0613300	1000	1000			2	3	3	172	rhoptry protein ROP14
PF3D7_0617000	1000	1000			1	3	3	43.6	mitochondrial import receptor subunit TOM40, putative
PF3D7_0619500	1000	1000			3	3	3	163.9	acyl-CoA synthetase
PF3D7_0627700	1000	1000			3	3	3	132.8	transportin
PF3D7_0629400	1000	1000			1	3	3	90.8	RNA-binding protein, putative
PF3D7_0629800	1000	1000			1	3	3	136.3	cullin-like protein, putative
PF3D7_0716800	1000	1000			3	3	3	37.3	eukaryotic translation initiation factor 3 subunit I, putative
PF3D7_0719600	1000	1000			2	3	3	20.2	60S ribosomal protein L11a, putative
PF3D7_0720400	1000	1000			3	3	3	72.7	ferrodoxin reductase-like protein
PF3D7_0807300	1000	1000			2	3	3	23.2	ras-related protein Rab-18
PF3D7_0811600	1000	1000			2	3	3	144	conserved Plasmodium protein, unknown function
PF3D7_0903400	1000	1000			3	3	3	300.9	ATP-dependent RNA helicase DDX60, putative
PF3D7_0905100	1000	1000			2	3	3	235.5	nucleoporin NUP100/NSP100, putative
PF3D7_0931100	1000	1000			1	3	3	97.9	nucleolar protein Nop52, putative
PF3D7_0931400	1000	1000			1	3	3	37.2	PUB domain-containing protein, putative
PF3D7_1002400	1000	1000			2	3	3	30.1	transformer-2 protein homolog beta, putative
PF3D7_1012200	1000	1000			2	3	3	31.8	rhoptry associated adhesin
PF3D7_1107400	1000	1000			1	3	3	38.6	DNA repair protein RAD51
PF3D7_1108700	1000	1000			2	3	3	62.4	heat shock protein J2
PF3D7_1129200	1000	1000			3	3	3	46.6	26S proteasome regulatory subunit RPN7, putative
PF3D7_1201000	1000	1000			2	3	3	77.1	Plasmodium exported protein (PHISTb), unknown function
PF3D7_1210600	1000	1000			1	3	3	122.9	conserved Plasmodium protein, unknown function
PF3D7_1216900	1000	1000			2	3	3	111.1	DNA-binding chaperone, putative
PF3D7_1302000	1000	1000			2	3	3	36.5	EMP1-trafficking protein
PF3D7_1304100	1000	1000			1	3	3	104.5	DNA ligase I
PF3D7_1315700	1000	1000			2	3	3	37.2	tRNA (adenine(58)-N(1))-methyltransferase catalytic subunit TRM61, putative
PF3D7_1316800	1000	1000			2	3	3	34.5	protein transport protein SEC20, putative
PF3D7_1317800	1000	1000			2	3	3	16.8	40S ribosomal protein S19
PF3D7_1319200	1000	1000			1	3	3	103.9	conserved Plasmodium protein, unknown function
PF3D7_1320000	1000	1000			2	3	3	149.2	golgi protein 1
PF3D7_1327800	1000	1000			2	3	3	64	ribose-phosphate pyrophosphokinase, putative
PF3D7_1336800	1000	1000			3	3	3	46	nuclear movement protein, putative
PF3D7_1354300	1000	1000			2	3	3	120.3	large subunit rRNA methyltransferase, putative
PF3D7_1355700	1000	1000			1	3	3	151.5	NLI interacting factor-like phosphatase, putative
PF3D7_1415400	1000	1000			3	3	3	178.5	conserved Plasmodium protein, unknown function
PF3D7_1419400	1000	1000			3	3	3	262.3	conserved Plasmodium membrane protein, unknown function
PF3D7_1427300	1000	1000			2	3	3	175.8	conserved Plasmodium protein, unknown function
PF3D7_1427500	1000	1000			2	3	3	94.7	DNA mismatch repair protein MSH2, putative
PF3D7_1455300	1000	1000			2	3	3	69.5	conserved Plasmodium protein, unknown function
PF3D7_1458600	1000	1000			1	3	3	139.6	conserved Plasmodium protein, unknown function
PF3D7_1461900	1000	1000			3	3	3	128.1	valine--tRNA ligase, putative
PF3D7_1471100	1000	1000			3	3	3	33.4	exported protein 2

## Sheet: S4 legend
Proteomics analysis of ChIRP-MS. Comparison of RUF6 targeted (even probes) to RNase treated control. Label-free quantitative LC-MS/MS analysis of RUF6 targeted (even probes)- and RNase treated control. Ratio, log2(ratio), peptides used (Pept. used), total peptides, and protein molecular weight (MW) in kilodaltons (kDa) are provided for all proteins. Adjusted p-value and the percent coefficient of…
