# Supplementary material for: Discovery of RUF6 ncRNA–interacting proteins involved in P. falciparum immune evasion
Source: Life Sci Alliance. 2022 Nov 15;6(1):e202201577. doi: 10.26508/lsa.202201577 (PMC9670795; doi:10.26508/lsa.202201577)
Supplement: Supplementary file 10 [file LSA-2022-01577_TableS8.xlsx]

## Sheet: S8 table
Table S8: LC-MS/MS analysis of GFP-tagged DDX5 Pf3D7_1445900 and protein of unknown function Pf3D7_1423700 (control) immunoprecipitation-MS
876 proteins	SLI5 Pf3D7/SLI3 Pf3D7 - Control						Total peptides in set	MW (kDa)	Description
	Ratio	Log2(Ratio)	Adj. p-value	CV %	Dist. pept. used	Pept. used
PF3D7_1252100	1.46327	0.549193	1.43567e-29	8.15149	86	775	888	263.2	rhoptry neck protein 3
PF3D7_0929400	1.37279	0.457109	7.40701e-28	8.2868	57	571	657	162.7	high molecular weight rhoptry protein 2
PF3D7_1410400	1.99987	0.999907	1.50726e-70	4.30915	40	415	493	90.1	rhoptry-associated protein 1
PF3D7_0930300	0.580406	-0.784865	1.51067e-34	6.95894	38	365	418	195.7	merozoite surface protein 1
PF3D7_0917900	1.517	0.601219	3.23786e-26	8.26083	35	356	408	72.4	heat shock protein 70
PF3D7_1357000	0.657205	-0.605584	7.03894e-20	9.63096	27	294	350	49	elongation factor 1-alpha
PF3D7_0817700	1.36081	0.444468	2.82345e-10	14.4169	30	281	314	133.7	rhoptry neck protein 5
PF3D7_0935800	1.16721	0.223067	0.000626194	26.8213	32	272	327	160.4	cytoadherence linked asexual protein 9
PF3D7_0523000	0.785847	-0.34768	1.31968e-07	17.3023	29	267	290	162.3	multidrug resistance protein 1
PF3D7_0823800	1.3928	0.477991	4.58988e-15	11.2533	25	242	289	76.7	DnaJ protein, putative
PF3D7_0827900	1.77277	0.826008	5.83894e-25	8.07107	25	232	261	55.5	protein disulfide isomerase
PF3D7_0818900	0.636749	-0.651204	1.20599e-16	10.4076	22	209	234	73.9	heat shock protein 70
PF3D7_0708400	0.647535	-0.626971	1.12757e-14	11.2433	21	199	220	86.2	heat shock protein 90
PF3D7_1011800	0.743729	-0.427151	0.000122313	23.7086	27	198	218	131.6	PRE-binding protein
PF3D7_1462800	0.583832	-0.776376	1.95413e-23	8.19892	18	196	229	36.6	glyceraldehyde-3-phosphate dehydrogenase
PF3D7_0905400	0.826126	-0.275567	0.0083415	34.6346	22	191	222	104.9	high molecular weight rhoptry protein 3
PF3D7_0722200	0.816365	-0.292714	0.00201873	29.5908	18	178	189	87.9	rhoptry-associated leucine zipper-like protein 1
PF3D7_1347500	0.544347	-0.877402	5.99194e-39	5.33773	17	172	194	42.2	DNA/RNA-binding protein Alba 4
PF3D7_0106300	1.91116	0.934445	4.05995e-36	5.63758	22	171	212	139.4	calcium-transporting ATPase
PF3D7_0501600	2.88434	1.52824	2.49772e-43	4.80839	16	170	192	46.7	rhoptry-associated protein 2
PF3D7_1222300	1.93781	0.954427	1.05594e-34	5.87809	20	169	189	95	endoplasmin, putative
PF3D7_1015900	0.505689	-0.983677	1.29739e-23	7.8466	15	161	186	48.7	enolase
PF3D7_1116800	1.26758	0.342075	0.000185106	24.2033	18	155	177	102.9	heat shock protein 101
PF3D7_0629200	2.07596	1.05378	1.46587e-33	5.85719	15	154	166	44.7	DnaJ protein, putative
PF3D7_1117700	0.941984	-0.0862254	0.242393	75.6825	15	154	177	24.9	GTP-binding nuclear protein RAN/TC4
PF3D7_1325100	1.28583	0.362696	4.32469e-05	22.0351	16	152	172	49.4	phosphoribosylpyrophosphate synthetase
PF3D7_1452000	1.0899	0.124192	0.145002	61.4796	19	148	165	249.5	rhoptry neck protein 2
PF3D7_1105000	0.588256	-0.765484	7.63492e-08	16.4659	11	147	168	11.5	histone H4
PF3D7_1451100	0.447702	-1.15939	8.88967e-39	4.98676	16	143	162	93.5	elongation factor 2
PF3D7_0507100	0.547184	-0.869903	1.12732e-16	9.75751	14	136	162	46.2	60S ribosomal protein L4
PF3D7_1465900	0.51886	-0.946582	4.82704e-17	9.57694	14	133	158	24.7	40S ribosomal protein S3
PF3D7_1246200	1.41979	0.505678	1.29423e-07	16.6187	15	128	139	41.9	actin I
PF3D7_0922500	0.669422	-0.579012	3.43096e-11	12.8388	14	127	134	45.4	phosphoglycerate kinase
PF3D7_0922200	0.585034	-0.773407	4.47473e-12	12.1142	16	126	140	44.8	S-adenosylmethionine synthetase
PF3D7_1105100	0.918783	-0.122205	0.208982	70.5131	13	123	162	13.1	histone H2B
PF3D7_0912400	2.0195	1.014	4.33311e-22	7.74071	11	122	135	52.7	alkaline phosphatase, putative
PF3D7_1338200	0.542338	-0.882736	2.38774e-11	12.6417	11	122	141	25.5	60S ribosomal protein L6-2, putative
PF3D7_0606700	1.14374	0.193753	0.0954327	54.1182	15	121	135	176.9	coatomer alpha subunit, putative
PF3D7_1006800	0.881266	-0.182351	0.127532	58.899	11	121	129	29.5	single-strand telomeric DNA-binding protein GBP2, putative
PF3D7_1324900	0.620564	-0.688349	8.53792e-09	14.9884	12	121	144	34.1	L-lactate dehydrogenase
PF3D7_0525100	0.844744	-0.243415	0.000474773	25.7197	13	120	135	76.9	acyl-CoA synthetase
PF3D7_1224300	0.551629	-0.85823	9.86393e-15	10.4422	15	120	130	97.2	polyadenylate-binding protein, putative
PF3D7_1456800	0.984295	-0.0228374	0.864374	473.251	12	115	129	76.4	V-type H(+)-translocating pyrophosphatase, putative
PF3D7_1223400	1.21114	0.276361	0.00239007	29.7737	13	112	124	190.4	phospholipid-transporting ATPase, putative
PF3D7_0608800	0.81607	-0.293236	0.00481185	32.0325	11	112	121	46.1	ornithine aminotransferase
PF3D7_1432100	1.3861	0.471036	0.000910544	27.0649	13	110	130	33.3	voltage-dependent anion-selective channel protein, putative
PF3D7_0322900	0.646648	-0.628947	2.06094e-10	13.2422	13	110	134	30	40S ribosomal protein S3A, putative
PF3D7_0626800	0.609626	-0.714004	4.7075e-07	17.2749	12	110	127	55.7	pyruvate kinase
PF3D7_0915400	0.650839	-0.619627	7.00949e-09	14.7025	15	108	126	159.5	ATP-dependent 6-phosphofructokinase
PF3D7_1027800	0.502093	-0.993974	6.21662e-24	6.91721	12	108	127	44.2	60S ribosomal protein L3
PF3D7_1424100	0.418394	-1.25706	1.48967e-30	5.52602	11	108	124	34	60S ribosomal protein L5, putative
PF3D7_1237700	1.22669	0.29477	0.000287607	24.6543	10	107	128	23.7	conserved protein, unknown function
PF3D7_1358800	0.463871	-1.1082	2.31497e-15	9.90554	11	107	123	17.3	40S ribosomal protein S15
PF3D7_1037300	1.65483	0.726682	4.96958e-08	15.7733	10	106	115	33.7	ADP/ATP transporter on adenylate translocase
PF3D7_1419200	1.03293	0.0467401	0.677681	199.774	13	106	121	80.2	thioredoxin-like protein, putative
PF3D7_1468700	0.867103	-0.205725	0.0656662	48.9901	14	106	130	45.3	eukaryotic initiation factor 4A
PF3D7_0422400	0.832547	-0.264396	0.00571474	32.6623	9	106	110	19.7	40S ribosomal protein S19
PF3D7_0913200	0.557743	-0.842328	9.74054e-14	10.7836	8	106	113	32	elongation factor 1-beta
PF3D7_0922600	0.970884	-0.0426288	0.723538	229.879	10	102	110	63.2	glutamine synthetase, putative
PF3D7_1027300	1.12586	0.171032	0.195365	68.4482	10	101	124	43.9	peroxiredoxin
PF3D7_1104400	1.03347	0.0474991	0.486091	124.787	10	101	108	49.3	thioredoxin, putative
PF3D7_0814200	0.469194	-1.09174	2.12399e-16	9.27074	12	100	116	27.3	DNA/RNA-binding protein Alba 1
PF3D7_1036900	0.399416	-1.32404	1.29478e-12	11.2522	12	98	111	192.7	conserved Plasmodium protein, unknown function
PF3D7_1447900	1.4464	0.532463	4.40058e-05	21.5372	12	96	110	119	multidrug resistance protein 2
PF3D7_1343000	0.683547	-0.548888	3.33977e-08	15.3724	11	96	106	31	phosphoethanolamine N-methyltransferase
PF3D7_1437900	0.723838	-0.466262	5.96079e-05	21.9393	12	95	106	48.5	HSP40, subfamily A
PF3D7_1424400	0.419698	-1.25258	3.14436e-16	9.23676	9	95	103	32.7	60S ribosomal protein L7-3, putative
PF3D7_0520000	0.808785	-0.306173	4.45629e-06	18.9177	10	94	116	22.1	40S ribosomal protein S9, putative
PF3D7_0307200	0.585319	-0.772706	1.11899e-12	11.1789	8	94	101	30.5	60S ribosomal protein L7, putative
PF3D7_1451800	1.79256	0.842022	4.50948e-14	10.2994	11	93	103	102.3	sortilin
PF3D7_1231100	1.74026	0.799306	1.04406e-19	7.79394	11	93	107	24.4	ras-related protein Rab-2
PF3D7_0613300	1.55317	0.635212	9.53851e-07	17.5729	10	93	103	172	rhoptry protein ROP14
PF3D7_1012900	1.05472	0.0768655	0.507422	130.718	13	93	111	43.5	autophagy-related protein 18, putative
PF3D7_1105400	0.695577	-0.523718	4.3893e-07	16.9361	12	93	117	29.8	40S ribosomal protein S4, putative
PF3D7_0814000	0.497052	-1.00853	1.34295e-11	11.8906	10	92	105	25.4	60S ribosomal protein L13-2, putative
PF3D7_0811200	1.78022	0.832059	1.42462e-19	7.74595	12	90	99	133.8	ER membrane protein complex subunit 1, putative
PF3D7_1341200	0.43229	-1.20993	1.24903e-21	7.10858	10	90	109	21.7	60S ribosomal protein L18, putative
PF3D7_1476300	1.24949	0.32134	0.12815	58.8149	9	89	92	68.1	Plasmodium exported protein (PHISTb), unknown function
PF3D7_0826700	0.699065	-0.516502	2.8017e-06	18.3819	11	89	101	35.7	receptor for activated c kinase
PF3D7_1342000	0.407613	-1.29473	2.01825e-20	7.41272	11	89	111	35.4	40S ribosomal protein S6
PF3D7_1408600	0.542555	-0.882158	5.69991e-13	10.8456	7	88	103	25.1	40S ribosomal protein S8e, putative
PF3D7_0918000	2.45018	1.29289	2.73081e-25	6.00355	11	87	99	44.6	glideosome-associated protein 50
PF3D7_1352500	1.19239	0.253851	0.111827	56.4227	11	87	105	24	thioredoxin-related protein, putative
PF3D7_1338300	0.735936	-0.442349	0.00190434	28.8249	10	87	90	47.8	elongation factor 1-gamma, putative
PF3D7_0621200	0.55494	-0.849597	2.60682e-13	10.4652	10	85	93	33	pyridoxine biosynthesis protein PDX1
PF3D7_1460700	0.553972	-0.852116	7.09382e-12	11.5154	9	85	100	16.7	60S ribosomal protein L27
PF3D7_1120100	0.369542	-1.43619	4.05995e-36	3.91852	9	85	107	28.8	phosphoglycerate mutase, putative
PF3D7_0217500	1.90048	0.926364	1.5558e-10	12.5682	10	83	96	60.8	calcium-dependent protein kinase 1
PF3D7_1416100	1.47808	0.56372	0.000128361	22.9055	11	83	92	110.6	protein SEY1, putative
PF3D7_1447000	0.88422	-0.177522	0.192199	67.8036	11	82	104	30	40S ribosomal protein S5
PF3D7_1410700	1.42179	0.507709	1.01437e-08	14.357	10	81	100	39.8	conserved Plasmodium protein, unknown function
PF3D7_0919100	0.860636	-0.216525	0.049905	45.9021	6	81	83	43.3	DnaJ protein, putative
PF3D7_1318800	1.34159	0.423946	0.00574115	32.3332	11	80	107	75.9	translocation protein SEC63, putative
PF3D7_1302800	0.899897	-0.152168	0.0675971	49.1477	9	80	92	22.5	40S ribosomal protein S7, putative
PF3D7_0202000	0.648435	-0.624967	0.000256514	23.988	12	80	96	71.3	knob-associated histidine-rich protein
PF3D7_1352400	1.31777	0.398099	0.00744373	33.3853	11	79	85	190.3	conserved Plasmodium protein, unknown function
PF3D7_0813300	0.334377	-1.58045	1.38721e-18	7.75365	6	79	99	36.3	conserved Plasmodium protein, unknown function
PF3D7_1003600	1.77163	0.825078	3.14459e-15	9.24392	8	78	89	32.7	inner membrane complex protein 1c, putative
PF3D7_0823200	0.952028	-0.0709239	0.531014	137.185	7	78	89	32.4	RNA-binding protein, putative
PF3D7_0305500	0.769804	-0.377438	0.0011743	27.31	10	78	91	467.9	conserved Plasmodium protein, unknown function
PF3D7_0801000	0.371909	-1.42698	1.25918e-11	11.4469	10	78	84	147.1	Plasmodium exported protein (PHISTc), unknown function
PF3D7_0501500	2.60628	1.38199	3.0319e-19	7.42357	9	77	83	47	rhoptry-associated protein 3
PF3D7_1131100	1.78007	0.831934	1.43517e-18	7.67495	9	76	84	94.4	serpentine receptor, putative
PF3D7_1320600	1.85585	0.892083	8.50859e-12	11.2659	9	75	80	24.8	ras-related protein Rab-11A
PF3D7_0822900	1.77175	0.825173	8.58716e-09	14.1665	8	75	76	138.2	conserved Plasmodium protein, unknown function
PF3D7_0209800	1.37355	0.457905	0.000183796	23.3495	8	75	83	52.2	ATP-dependent RNA helicase UAP56
PF3D7_0708800	0.592527	-0.755048	7.9886e-10	12.9637	10	75	82	100	heat shock protein 110
PF3D7_1130100	0.293029	-1.77089	4.1627e-18	7.81152	8	75	82	10.3	60S ribosomal protein L38
PF3D7_1462300	1.83852	0.878548	2.47788e-08	14.6885	9	74	79	161.2	GTP-binding protein, putative
PF3D7_1130200	0.728455	-0.457089	0.000166043	23.1594	9	74	81	35	60S ribosomal protein P0
PF3D7_0517300	0.648004	-0.625926	6.47668e-05	21.6372	8	74	88	34.6	serine/arginine-rich splicing factor 1
PF3D7_1212700	0.579194	-0.787882	4.99083e-11	11.8662	7	74	79	166.1	eukaryotic translation initiation factor 3 subunit A, putative
PF3D7_1414300	0.565104	-0.823411	3.41586e-08	14.8021	10	74	88	25.2	60S ribosomal protein L10, putative
PF3D7_1308200	0.347004	-1.52698	3.23786e-26	5.29033	9	74	82	273.4	carbamoyl phosphate synthetase
PF3D7_0416800	2.1589	1.1103	1.99596e-16	8.43536	9	73	79	22	small GTP-binding protein sar1
PF3D7_1020900	1.59868	0.676881	2.33298e-08	14.58	8	73	82	20.9	ADP-ribosylation factor
PF3D7_1410600	0.854457	-0.226921	0.0372261	43.062	8	73	79	51.2	eukaryotic translation initiation factor 2 subunit gamma, putative
PF3D7_0813900	0.644249	-0.63431	4.74094e-14	9.67373	9	73	85	16.3	40S ribosomal protein S16, putative
PF3D7_1006200	0.58537	-0.772579	3.22427e-07	16.2868	7	73	80	12	DNA/RNA-binding protein Alba 3
PF3D7_1445900	4.87951	2.28674	3.91552e-28	4.70248	9	71	76	60	ATP-dependent RNA helicase DDX5, putative
PF3D7_1438900	0.818108	-0.289637	0.0468974	45.1017	8	71	78	21.8	thioredoxin peroxidase 1
PF3D7_0309600	0.257517	-1.95726	8.21458e-23	5.96162	8	71	86	11.9	60S acidic ribosomal protein P2
PF3D7_1129000	1.73267	0.792999	6.19458e-10	12.6901	7	70	86	36.6	spermidine synthase
PF3D7_0316800	1.34469	0.427271	2.64547e-05	20.371	8	70	82	14.9	40S ribosomal protein S15A, putative
PF3D7_1103100	0.304864	-1.71376	4.92041e-20	6.83227	7	70	78	13	60S acidic ribosomal protein P1, putative
PF3D7_0934800	0.949354	-0.0749824	0.552261	144.947	7	69	79	40.2	cAMP-dependent protein kinase catalytic subunit
PF3D7_1323100	0.545065	-0.8755	4.90111e-07	16.494	8	69	78	21.6	60S ribosomal protein L6, putative
PF3D7_0512600	1.49087	0.576156	8.69005e-08	15.2624	7	68	81	22.9	ras-related protein Rab-1B
PF3D7_1223100	1.27687	0.352614	3.33814e-06	18.0517	8	68	76	50.8	cAMP-dependent protein kinase regulatory subunit
PF3D7_1022400	0.689169	-0.537071	0.00030355	24.1132	9	68	78	62.1	serine/arginine-rich splicing factor 4
PF3D7_0517000	0.497264	-1.00792	4.43643e-13	10.076	7	68	76	18.1	60S ribosomal protein L12, putative
PF3D7_0624000	0.897278	-0.156374	0.0813031	51.3405	8	67	76	55.3	hexokinase
PF3D7_1135100	1.58031	0.660208	1.99907e-10	12.0833	8	66	73	79.9	protein phosphatase PPM8, putative
PF3D7_0506900	2.85567	1.51383	9.82762e-12	10.8545	8	65	72	86.7	rhomboid protease ROM4
PF3D7_0419400	2.35039	1.2329	3.40248e-14	9.23352	8	65	70	296.5	conserved Plasmodium protein, unknown function
PF3D7_0619400	1.18834	0.248943	0.0952666	53.5341	7	65	66	92.4	cell division cycle protein 48 homologue, putative
PF3D7_1008700	1.59758	0.675886	1.00216e-05	19.0665	8	64	73	49.8	tubulin beta chain
PF3D7_0618300	0.49325	-1.01961	6.31841e-09	13.5546	5	63	67	16.7	60S ribosomal protein L27a, putative
PF3D7_0714000	1.00978	0.0140406	0.943779	1185.43	8	62	69	13.8	histone H2B variant
PF3D7_1126200	0.90062	-0.15101	0.46187	117.278	7	62	65	17.9	40S ribosomal protein S18, putative
PF3D7_0212500	0.793588	-0.333538	0.0772054	50.5287	8	62	63	477.9	conserved Plasmodium protein, unknown function
PF3D7_0415900	0.709861	-0.494392	6.34467e-06	18.4041	7	62	76	24.1	60S ribosomal protein L15, putative
PF3D7_1332900	0.634997	-0.655179	2.26563e-11	11.1043	7	62	67	151.3	isoleucine--tRNA ligase, putative
PF3D7_1459400	1.11419	0.155995	0.476128	121.136	6	61	79	40.1	conserved Plasmodium protein, unknown function
PF3D7_1124600	1.06958	0.0970395	0.489095	125.411	7	61	65	49.9	ethanolamine kinase
PF3D7_0306400	2.12962	1.0906	8.95882e-12	10.5242	9	60	66	74.7	FAD-dependent glycerol-3-phosphate dehydrogenase, putative
PF3D7_0807300	1.48723	0.57263	4.5539e-06	18.0271	8	60	72	23.2	ras-related protein Rab-18
PF3D7_0818200	1.13073	0.177249	0.253741	76.931	8	60	71	30.2	14-3-3 protein
PF3D7_1242700	0.772028	-0.373274	0.00241132	29.0143	7	60	70	16.1	40S ribosomal protein S17, putative
PF3D7_0404700	0.723312	-0.46731	0.00211361	28.6132	7	60	62	110.5	dipeptidyl aminopeptidase 3
PF3D7_1234800	1.93018	0.948737	2.7517e-09	12.9228	7	59	65	151.8	splicing factor 3B subunit 3, putative
PF3D7_0916700	0.662194	-0.594674	1.00216e-05	18.8488	8	59	67	45.1	RNA-binding protein musashi, putative
PF3D7_1206200	0.462578	-1.11223	4.36346e-13	9.61352	7	59	62	116	eukaryotic translation initiation factor 3 subunit C, putative
PF3D7_0517700	0.665875	-0.586677	0.000153077	22.5255	7	58	65	84.1	eukaryotic translation initiation factor 3 subunit B, putative
PF3D7_0821000	3.20388	1.67982	5.79717e-23	5.03648	9	57	75	60.5	conserved Plasmodium protein, unknown function
PF3D7_0516900	0.55593	-0.847026	8.21017e-05	21.5282	6	57	62	28	60S ribosomal protein L2
PF3D7_0520900	0.527726	-0.92214	4.46863e-10	11.9121	8	57	65	53.8	adenosylhomocysteinase
PF3D7_0516200	0.398552	-1.32716	1.51113e-09	12.4531	6	57	73	16.1	40S ribosomal protein S11
PF3D7_1438100	2.31354	1.2101	6.40329e-13	9.45806	6	56	71	43.9	secretory complex protein 62
PF3D7_0214900	2.03037	1.02174	2.30974e-11	10.7431	7	56	63	112.2	rhoptry neck protein 6
PF3D7_0610400	1.48829	0.573652	2.24116e-08	13.8216	5	55	71	15.4	histone H3
PF3D7_0811600	1.13402	0.181444	0.132141	58.8659	8	55	65	144	conserved Plasmodium protein, unknown function
PF3D7_0629500	1.03495	0.0495575	0.789418	300.961	8	55	65	68.9	amino acid transporter, putative
PF3D7_1134000	1.37868	0.463283	0.000511553	24.5737	6	53	69	73.3	heat shock protein 70
PF3D7_0605100	0.882434	-0.18044	0.0385749	42.9505	6	53	59	85.6	RNA-binding protein, putative
PF3D7_1444800	0.460134	-1.11987	1.83524e-12	9.63443	7	53	63	40.1	fructose-bisphosphate aldolase
PF3D7_0817900	0.407125	-1.29646	1.51265e-09	12.2512	7	53	59	11.5	high mobility group protein B2
PF3D7_1471100	3.05871	1.61292	2.01387e-11	10.4652	5	52	54	33.4	exported protein 2
PF3D7_1118500	1.69899	0.764676	4.92482e-07	15.707	6	52	59	69.4	nucleolar protein 56, putative
PF3D7_1145400	1.31344	0.393347	0.0806099	50.913	6	52	53	96.4	dynamin-like protein
PF3D7_0617000	1.17844	0.236877	0.0664993	48.4549	6	52	56	43.6	mitochondrial import receptor subunit TOM40, putative
PF3D7_0709000	0.839796	-0.251888	0.152742	61.7749	5	52	56	48.7	chloroquine resistance transporter
PF3D7_0711000	0.784104	-0.350883	0.000383074	23.9995	7	52	61	142.1	AAA family ATPase, CDC48 subfamily
PF3D7_1004000	0.375259	-1.41404	1.02434e-15	7.55829	5	52	65	23.8	60S ribosomal protein L13, putative
PF3D7_1423700	0.33303	-1.58627	1.12757e-14	8.12592	7	52	59	183.6	conserved Plasmodium protein, unknown function
PF3D7_0524000	1.02827	0.0402156	0.778528	282.936	7	51	59	127.4	karyopherin beta
PF3D7_1361800	0.917573	-0.124105	0.222911	71.8626	7	51	60	291	glideosome-associated connector
PF3D7_1026800	0.599028	-0.739304	0.000937501	25.9417	6	51	61	29.9	40S ribosomal protein S2
PF3D7_1474600	2.12055	1.08444	1.08894e-11	9.98847	5	50	61	46.2	conserved Plasmodium membrane protein, unknown function
PF3D7_1117300	1.19907	0.261916	0.0457343	44.3852	4	49	52	15.3	conserved Plasmodium protein, unknown function
PF3D7_1419700	0.887382	-0.172373	0.223085	71.8998	6	49	56	59.7	conserved Plasmodium protein, unknown function
PF3D7_1431700	0.593739	-0.752099	0.000269542	23.2058	5	49	57	19.3	60S ribosomal protein L14, putative
PF3D7_1211900	2.03254	1.02328	3.43096e-11	10.3402	6	48	54	140.3	non-SERCA-type Ca2+ -transporting P-ATPase
PF3D7_1013300	1.42688	0.512869	5.82636e-06	17.6975	6	48	56	75.5	conserved Plasmodium protein, unknown function
PF3D7_0422100	1.00615	0.00885213	0.947948	1283.91	6	48	49	44.9	transmembrane emp24 domain-containing protein, putative
PF3D7_1351400	0.570929	-0.808616	1.07145e-09	11.6805	6	48	63	23.4	60S ribosomal protein L17, putative
PF3D7_0401800	0.52461	-0.930683	3.9717e-05	20.0313	6	48	55	60.3	Plasmodium exported protein (PHISTb), unknown function
PF3D7_0106800	1.97568	0.982347	1.42111e-12	9.10852	6	47	57	24.3	ras-related protein Rab-5C
PF3D7_1333300	1.4637	0.549619	9.50175e-05	21.2662	6	47	51	25	transmembrane protein Tmp21 homologue, putative
PF3D7_0316700	0.967298	-0.0479679	0.782171	290.667	6	47	57	26	protein YOP1, putative
PF3D7_1306200	0.843593	-0.245381	0.250136	75.9633	6	47	50	56.8	conserved Plasmodium protein, unknown function
PF3D7_1242800	0.842562	-0.247145	0.0687241	48.691	5	47	48	52.3	rab specific GDP dissociation inhibitor
PF3D7_0319600	0.76129	-0.393482	0.0166875	36.7445	4	47	49	17.7	elongation factor 1-delta, putative
PF3D7_0923900	0.593622	-0.752384	4.20364e-05	20.0398	6	47	52	23	RNA-binding protein, putative
PF3D7_0605900	0.459021	-1.12337	6.47527e-09	12.5859	6	47	54	34.7	long chain polyunsaturated fatty acid elongation enzyme, putative
PF3D7_0813400	0.279762	-1.83773	1.88003e-16	6.79962	6	47	48	76.9	conserved Plasmodium protein, unknown function
PF3D7_0709700	1.85375	0.890449	1.17587e-12	8.94255	6	46	52	42.4	prodrug activation and resistance esterase
PF3D7_1349200	1.00889	0.0127703	0.90666	713.272	6	46	51	101.4	glutamate--tRNA ligase, putative
PF3D7_1007900	0.633994	-0.657458	0.000193083	22.3752	6	46	48	63.1	eukaryotic translation initiation factor 3 subunit D, putative
PF3D7_0903900	0.323152	-1.62971	7.40525e-16	6.99386	5	46	52	15.5	60S ribosomal protein L32
PF3D7_1004400	0.3194	-1.64656	9.01873e-09	12.6855	6	46	49	106.3	RNA-binding protein, putative
PF3D7_1323700	0.827399	-0.273345	0.319167	88.121	4	45	46	34	glideosome associated protein with multiple membrane spans 1
PF3D7_0205900	0.67343	-0.570399	0.00121189	26.3409	6	45	53	108.4	26S proteasome regulatory subunit RPN1, putative
PF3D7_1401600	0.45092	-1.14906	3.27616e-07	15.011	4	45	47	55.8	Plasmodium exported protein (PHISTb), unknown function
PF3D7_1202900	0.435937	-1.19781	8.76424e-09	12.572	6	45	50	11.3	high mobility group protein B1
PF3D7_0515700	3.67867	1.87918	1.06979e-12	8.80025	5	44	45	51.8	glideosome-associated protein 40, putative
PF3D7_1108700	1.3993	0.484704	0.0169046	36.6814	5	44	47	62.4	heat shock protein J2
PF3D7_0903200	1.28966	0.366991	0.0197461	37.5709	6	44	51	23.8	ras-related protein RAB7
PF3D7_1407800	0.96965	-0.0444645	0.793788	307.111	6	44	47	51	plasmepsin IV
PF3D7_0905900	0.897047	-0.156745	0.261449	77.8497	5	44	46	118.2	coatomer subunit beta, putative
PF3D7_0803800	0.575828	-0.79629	0.000255198	22.7593	6	44	47	30.9	proteasome subunit beta type-4
PF3D7_1463900	1.53998	0.622914	1.08581e-06	15.7936	5	43	50	127.1	EF-hand calcium-binding domain-containing protein, putative
PF3D7_0525800	1.40219	0.487679	0.00165628	27.1393	5	43	48	34.3	inner membrane complex protein 1g, putative
PF3D7_1346300	0.974662	-0.0370267	0.816193	352.603	6	43	59	25	DNA/RNA-binding protein Alba 2
PF3D7_0716800	0.811957	-0.300526	0.00358671	29.5504	6	43	52	37.3	eukaryotic translation initiation factor 3 subunit I, putative
PF3D7_1421200	0.440643	-1.18232	1.82303e-07	14.3999	5	43	47	11.7	40S ribosomal protein S25
PF3D7_1347200	1.67352	0.742883	0.000540251	24.2014	4	42	49	47.6	nucleoside transporter 1
PF3D7_1116000	1.19094	0.2521	0.108778	55.1073	5	42	47	135.6	rhoptry neck protein 4
PF3D7_1361100	0.939895	-0.0894284	0.592985	158.446	5	42	44	106.7	protein transport protein Sec24A
PF3D7_0604500	0.565059	-0.823528	7.09952e-06	17.3246	7	42	45	334.4	conserved Plasmodium protein, unknown function
PF3D7_1110400	0.407931	-1.2936	5.36163e-07	15.0288	6	42	49	173.9	RNA-binding protein, putative
PF3D7_1144900	2.95669	1.56398	4.84213e-13	8.07765	6	41	51	23.6	ras-related protein Rab-6
PF3D7_1235700	1.91517	0.937471	9.60962e-08	13.6441	5	41	52	58.4	ATP synthase subunit beta, mitochondrial
PF3D7_1246800	1.29403	0.371866	0.138708	59.4051	4	41	42	30.6	signal recognition particle receptor subunit beta, putative
PF3D7_0722400	1.07791	0.108237	0.460778	116.274	5	41	46	45.2	Obg-like ATPase 1, putative
PF3D7_0309500	0.719653	-0.474626	0.00358671	29.3988	6	41	48	69.9	asparagine synthetase [glutamine-hydrolyzing], putative
PF3D7_1354200	1.36073	0.444385	0.048177	44.4878	6	40	42	95	inositol-polyphosphate 5-phosphatase, putative
PF3D7_1406800	1.32125	0.401902	0.0730969	49.1618	4	40	50	32.9	glideosome associated protein with multiple membrane spans 3
PF3D7_1238800	1.03279	0.0465531	0.87953	540.367	5	40	42	92.1	acyl-CoA synthetase
PF3D7_1311900	0.839191	-0.252928	0.0687241	48.4331	5	40	45	68.6	V-type proton ATPase catalytic subunit A
PF3D7_0719600	0.547384	-0.869374	2.0464e-05	18.5964	4	40	47	20.2	60S ribosomal protein L11a, putative
PF3D7_0320700	2.1185	1.08304	3.36251e-11	9.43782	5	39	49	21	signal peptidase complex subunit SPC2, putative
PF3D7_1417500	1.20608	0.27033	0.0127769	34.8287	4	39	44	52.9	H/ACA ribonucleoprotein complex subunit 4, putative
PF3D7_0617800	1.13648	0.184574	0.264809	78.2163	3	39	43	14.1	histone H2A
PF3D7_1346100	1.10453	0.143435	0.483046	122.879	4	39	47	52.2	protein transport protein SEC61 subunit alpha
PF3D7_1341300	0.895037	-0.159981	0.544862	141.019	4	39	47	21.5	60S ribosomal protein L18-2, putative
PF3D7_1212100	0.74912	-0.416731	0.00248343	28.2132	3	39	47	66.5	peripheral plastid protein 1, putative
PF3D7_1204300	0.647855	-0.626258	0.00157741	26.7863	3	39	40	17.6	eukaryotic translation initiation factor 5A
PF3D7_0519400	0.605572	-0.723629	4.78235e-06	16.6779	5	39	50	15.4	40S ribosomal protein S24
PF3D7_0317000	0.51071	-0.969425	3.78642e-05	19.2986	5	39	41	29.3	proteasome subunit alpha type-3, putative
PF3D7_0306900	0.485184	-1.0434	3.14029e-09	11.4555	3	39	48	16.1	40S ribosomal protein S23, putative
PF3D7_1212500	1.64943	0.721965	1.19234e-08	12.0847	4	38	41	66.9	glycerol-3-phosphate 1-O-acyltransferase
PF3D7_1111100	1.61008	0.687129	0.0139819	35.2533	5	38	44	40.3	replication factor C subunit 5, putative
PF3D7_0627800	1.50221	0.587088	0.000269542	22.4549	5	38	43	113.9	acetyl-CoA synthetase, putative
PF3D7_0728000	1.34908	0.43198	0.0210595	37.7472	4	38	38	37.8	eukaryotic translation initiation factor 2 subunit alpha, putative
PF3D7_1447700	1.26425	0.33828	0.0862881	51.3334	4	38	47	40.7	conserved Plasmodium protein, unknown function
PF3D7_0424600	1.24888	0.320637	0.255204	76.651	4	38	40	36	Plasmodium exported protein (PHISTb), unknown function
PF3D7_0204200	0.892131	-0.164673	0.231344	72.8727	4	38	42	33.4	conserved Plasmodium protein, unknown function
PF3D7_1127000	0.872032	-0.197546	0.286051	81.9544	3	38	39	34.5	protein phosphatase, putative
PF3D7_0500800	0.604494	-0.726199	0.0109421	33.9589	5	38	42	168.3	mature parasite-infected erythrocyte surface antigen
PF3D7_1441200	0.324973	-1.62161	9.37104e-16	6.02002	6	38	48	24.8	60S ribosomal protein L1, putative
PF3D7_1010300	1.50413	0.588932	9.92687e-06	17.5124	3	37	40	13.7	succinate dehydrogenase subunit 4, putative
PF3D7_1309100	0.447483	-1.1601	2.38283e-12	8.32009	4	37	46	19.2	60S ribosomal protein L24, putative
PF3D7_1012400	0.3976	-1.33061	3.5257e-10	10.1328	4	37	41	26.4	hypoxanthine-guanine phosphoribosyltransferase
PF3D7_1460600	2.24758	1.16837	1.10273e-08	11.89	4	36	39	17.1	inner membrane complex sub-compartment protein 3
PF3D7_1437000	1.64836	0.72103	3.37246e-06	15.9367	5	36	42	64.2	N-acetyltransferase, putative
PF3D7_0306800	1.08509	0.117819	0.546632	141.571	5	36	40	59.2	T-complex protein 1 subunit beta
PF3D7_0503300	0.796295	-0.328625	0.0335347	41.0757	4	36	38	37.7	serine/arginine-rich splicing factor 12
PF3D7_1428300	0.610163	-0.712733	1.98514e-06	15.6691	4	36	39	42.6	proliferation-associated protein 2g4, putative
PF3D7_1108400	1.37081	0.455032	5.87945e-05	19.6201	4	35	38	39.9	casein kinase 2, alpha subunit
PF3D7_0320300	0.855031	-0.225952	0.279942	80.4623	5	35	41	59.2	T-complex protein 1 subunit epsilon
PF3D7_0513300	0.722568	-0.468795	0.0291449	39.8046	4	35	38	26.9	purine nucleoside phosphorylase
PF3D7_0405900	1.57368	0.654144	0.0434408	43.0922	5	34	41	85.5	apical sushi protein
PF3D7_1008400	1.5232	0.607105	0.000118262	20.4981	5	34	39	49.8	26S protease regulatory subunit 4, putative
PF3D7_1413900	1.40852	0.494177	0.0210595	37.45	4	34	37	45.2	DnaJ protein, putative
PF3D7_1442900	1.37379	0.45816	0.00538105	30.4469	4	34	36	404.6	protein transport protein SEC7, putative
PF3D7_1032500	1.25752	0.330582	0.137339	58.8633	3	34	39	31	DER1-like protein, putative
PF3D7_1407100	1.20263	0.266195	0.039171	42.1482	5	34	38	34.1	rRNA 2'-O-methyltransferase fibrillarin, putative
PF3D7_1229500	0.900378	-0.151397	0.358445	94.5471	5	34	39	60.7	T-complex protein 1 subunit gamma
PF3D7_1034900	0.645785	-0.630874	0.011807	34.1112	4	34	35	104.2	methionine--tRNA ligase
PF3D7_0210900	0.342538	-1.54566	7.35925e-07	14.5447	3	34	37	32.5	conserved Plasmodium protein, unknown function
PF3D7_1144000	0.192953	-2.37368	3.53599e-18	4.59461	3	34	43	9.1	40S ribosomal protein S21
PF3D7_1109900	0.601954	-0.732276	1.4274e-06	14.9578	3	33	37	12.8	60S ribosomal protein L36
PF3D7_1124900	0.361015	-1.46987	8.40443e-08	12.5634	5	33	40	14.7	60S ribosomal protein L35, putative
PF3D7_0423500	3.39053	1.76151	3.12297e-07	13.5212	3	32	36	42.6	glideosome associated protein with multiple membrane spans 2
PF3D7_0405400	2.39414	1.25951	1.1959e-08	11.3206	4	32	43	366.4	pre-mRNA-processing-splicing factor 8, putative
PF3D7_1317800	0.981352	-0.0271576	0.903407	684.719	4	32	41	16.8	40S ribosomal protein S19
PF3D7_0628300	0.972508	-0.0402173	0.873072	504.729	4	32	34	45.1	choline/ethanolaminephosphotransferase, putative
PF3D7_0322000	0.667424	-0.583324	0.0348862	41.0835	4	32	36	19	peptidyl-prolyl cis-trans isomerase
PF3D7_0214000	0.520665	-0.941574	4.51095e-09	10.7326	4	32	35	61	T-complex protein 1 subunit theta
PF3D7_0316600	1.83085	0.872514	0.00147221	25.7626	4	31	33	34.5	formate-nitrite transporter
PF3D7_1116500	1.56206	0.643448	0.0542595	45.0795	5	31	37	51.4	folate transporter 2
PF3D7_1113300	1.25927	0.332591	0.207591	68.7576	3	31	35	39.4	UDP-galactose transporter, putative
PF3D7_0608700	1.02304	0.0328651	0.87953	533.773	4	31	35	61.5	T-complex protein 1 subunit zeta
PF3D7_0520400	0.994782	-0.00754726	0.941123	1117.97	4	31	34	35.7	single-stranded DNA-binding protein, putative
PF3D7_1330800	0.409387	-1.28846	3.53789e-12	7.43378	3	31	36	68	RNA-binding protein, putative
PF3D7_0933600	2.17707	1.12239	4.90111e-07	13.53	4	30	31	55.7	mitochondrial-processing peptidase subunit beta, putative
PF3D7_1468100	1.50756	0.592217	0.000115592	19.8398	5	30	36	295.8	conserved Plasmodium protein, unknown function
PF3D7_1235600	1.0788	0.109424	0.364381	95.4091	4	30	37	49.8	serine hydroxymethyltransferase
PF3D7_0719700	0.934965	-0.0970159	0.651324	183.548	4	30	38	16.5	40S ribosomal protein S10, putative
PF3D7_0618000	0.79746	-0.326517	0.0769385	49.0736	5	30	36	92.8	conserved Plasmodium membrane protein, unknown function
PF3D7_0102200	0.432821	-1.20816	3.95446e-06	15.458	4	30	32	126.5	ring-infected erythrocyte surface antigen
PF3D7_1229400	0.407724	-1.29434	7.227e-12	7.68323	3	30	30	12.8	macrophage migration inhibitory factor
PF3D7_0617200	0.354908	-1.49448	3.23953e-08	11.5404	4	30	32	53	conserved Plasmodium protein, unknown function
PF3D7_1409600	2.43068	1.28136	2.10652e-11	7.89563	3	29	30	92.7	conserved Plasmodium protein, unknown function
PF3D7_0831700	1.4284	0.514401	0.00114463	24.9055	2	29	30	75.1	heat shock protein 70
PF3D7_0302500	1.42121	0.50712	0.0540247	44.9151	4	29	31	167.2	cytoadherence linked asexual protein 3.1
PF3D7_0413500	1.22922	0.297741	0.0609844	46.1924	4	29	35	35.2	phosphoglucomutase-2
PF3D7_1360200	0.92812	-0.107616	0.62436	170.243	3	29	29	29.6	ER membrane protein complex subunit 3, putative
PF3D7_1439800	0.908617	-0.138255	0.169587	63.0885	4	29	34	27.7	vesicle-associated membrane protein, putative
PF3D7_1132800	2.17695	1.12231	5.61697e-06	15.6387	3	28	30	28.3	aquaglyceroporin
PF3D7_1202200	1.86658	0.900398	0.00116778	24.8156	3	28	30	36.8	mitochondrial phosphate carrier protein
PF3D7_1108600	1.7816	0.833175	0.000229793	21.089	3	28	29	39.4	endoplasmic reticulum-resident calcium binding protein
PF3D7_1246400	1.53481	0.61806	2.87974e-05	17.6951	3	28	29	23.5	myosin A tail domain interacting protein
PF3D7_0927900	1.37909	0.463717	0.0241441	37.8289	3	28	29	41.5	phosphatidylserine decarboxylase
PF3D7_0922100	1.14782	0.198897	0.634926	174.957	4	28	29	182.1	ubiquitin-like protein, putative
PF3D7_0610800	0.561694	-0.832143	0.000317223	21.7679	3	28	30	75.8	transketolase
PF3D7_1457000	4.78822	2.25949	1.12726e-10	7.87342	4	27	31	47.6	signal peptide peptidase
PF3D7_1410000	1.97618	0.982712	3.84645e-05	17.8987	3	27	27	35	ER membrane protein complex subunit 2, putative
PF3D7_0903700	1.47745	0.563114	0.0266467	38.4225	3	27	30	50.3	alpha tubulin 1
PF3D7_0904800	0.798465	-0.324699	0.0760945	48.6729	4	27	32	56.2	replication protein A1, small fragment
PF3D7_1331700	0.78425	-0.350614	0.2772	79.557	3	27	29	108.5	glutamine--tRNA ligase, putative
PF3D7_1429800	0.746978	-0.420862	0.105418	53.6229	3	27	27	160	coatomer subunit beta, putative
PF3D7_0211800	0.501218	-0.996489	9.51579e-06	16.0671	3	27	28	70.5	asparagine--tRNA ligase
PF3D7_1460300	0.357217	-1.48513	1.14968e-08	10.4626	3	27	27	8	60S ribosomal protein L29, putative
PF3D7_1444300	1.37941	0.464052	0.00208216	26.2429	2	26	29	33.7	1-acyl-sn-glycerol-3-phosphate acyltransferase, putative
PF3D7_0208800	1.28335	0.359911	0.0128873	33.5791	4	26	28	28.2	conserved Plasmodium protein, unknown function
PF3D7_1441400	1.14563	0.196135	0.20292	67.696	3	26	29	58.8	FACT complex subunit SSRP1, putative
PF3D7_1216200	1.0628	0.0878666	0.759938	260.654	3	26	26	41.2	glycerol-3-phosphate dehydrogenase [NAD(+)], putative
PF3D7_1219100	0.960543	-0.0580785	0.666971	191.424	3	26	33	232.9	clathrin heavy chain, putative
PF3D7_0528200	0.919365	-0.12129	0.541863	138.964	3	26	27	61.4	eukaryotic translation initiation factor 3 subunit E, putative
PF3D7_0612100	0.76788	-0.381047	0.0643245	46.4601	4	26	31	78.1	eukaryotic translation initiation factor 3 subunit L, putative
PF3D7_0102900	0.755793	-0.403937	0.0430716	42.2206	4	26	29	73.5	aspartate--tRNA ligase
PF3D7_0519700	0.459902	-1.1206	4.79297e-09	9.68936	3	26	28	22.7	FoP domain-containing protein, putative
PF3D7_0614500	0.336946	-1.56941	3.34297e-09	9.49366	3	26	35	21.6	60S ribosomal protein L19
PF3D7_1358700	1.51507	0.599386	0.00960613	32.0367	3	25	30	18.4	YOP1-like protein, putative
PF3D7_1130400	1.25549	0.32825	0.067398	47.0337	3	25	26	49.5	26S protease regulatory subunit 6A, putative
PF3D7_1441100	0.578441	-0.789758	9.94845e-06	15.6786	3	25	26	26.3	conserved Plasmodium protein, unknown function
PF3D7_1426000	0.308565	-1.69635	1.70852e-07	11.7778	3	25	27	18.8	60S ribosomal protein L21
PF3D7_1134100	3.09433	1.62963	3.08568e-09	8.88986	3	24	28	49.2	protein disulfide isomerase
PF3D7_0218000	2.73992	1.45413	2.92946e-06	14.0078	3	24	25	37.9	replication factor C subunit 2, putative
PF3D7_1310500	2.46303	1.30043	3.98642e-08	10.4573	3	24	27	24.4	conserved protein, unknown function
PF3D7_1203700	0.995474	-0.00654483	0.979601	3663.38	3	24	27	40.5	nucleosome assembly protein
PF3D7_0528100	0.849432	-0.235429	0.219265	69.9327	3	24	26	106.2	AP-1 complex subunit beta, putative
PF3D7_0609000	0.812272	-0.299965	0.205729	67.8616	3	24	24	720.5	conserved Plasmodium protein, unknown function
PF3D7_1353900	0.591361	-0.757888	0.00137673	24.299	4	24	26	27.2	proteasome subunit alpha type-7, putative
PF3D7_0617900	0.505128	-0.98528	0.0298492	38.8538	2	24	26	15.4	histone H3 variant
PF3D7_1003500	0.496566	-1.00994	0.000474773	21.7905	2	24	27	13.5	40S ribosomal protein S20e, putative
PF3D7_0317600	0.339743	-1.55748	5.09849e-09	9.17278	3	24	26	18.8	40S ribosomal protein S11, putative
PF3D7_0323000	0.261139	-1.93711	1.11386e-10	7.30961	3	24	26	6.1	translation machinery-associated protein 7, putative
PF3D7_0906200	1.22366	0.291205	0.0143666	33.8061	3	23	28	69.2	conserved Plasmodium protein, unknown function
PF3D7_0511500	1.15038	0.202106	0.429591	107.962	3	23	26	1187.6	RNA pseudouridylate synthase, putative
PF3D7_1008900	1.00576	0.00829212	0.977253	2897.77	3	23	23	27.6	adenylate kinase
PF3D7_0706000	0.961579	-0.056523	0.837802	396.694	3	23	25	145.5	importin-7, putative
PF3D7_0707300	0.80647	-0.310307	0.159236	61.0375	3	23	27	103.6	rhoptry-associated membrane antigen
PF3D7_0810600	0.475909	-1.07124	5.87131e-05	17.5876	3	23	25	108.6	ATP-dependent RNA helicase DBP1, putative
PF3D7_0511800	0.437308	-1.19328	4.28753e-08	10.1994	3	23	24	69.1	inositol-3-phosphate synthase
PF3D7_1142600	0.420226	-1.25076	5.17916e-11	6.69793	3	23	25	16.3	60S ribosomal protein L35ae, putative
PF3D7_0627700	4.46529	2.15875	2.35847e-09	8.09756	3	22	23	132.8	transportin
PF3D7_1323500	2.36919	1.2444	4.61603e-05	16.9259	3	22	22	68.5	plasmepsin V
PF3D7_0919000	2.02939	1.02105	0.00171591	24.726	3	22	26	31.8	nucleosome assembly protein
PF3D7_0204700	1.4082	0.493857	0.0876486	50.0968	3	22	28	56.4	hexose transporter
PF3D7_0721600	1.37834	0.462936	0.0170424	34.5919	3	22	25	21.9	40S ribosomal protein S5, putative
PF3D7_1008800	1.34301	0.425468	0.280729	79.6143	3	22	28	53.4	nucleolar protein 5, putative
PF3D7_0920800	1.30664	0.385863	0.0200692	35.3841	4	22	28	56.2	inosine-5'-monophosphate dehydrogenase
PF3D7_1357800	1.11013	0.150723	0.549515	141.714	3	22	24	58	T-complex protein 1 subunit delta
PF3D7_0406100	0.975313	-0.0360627	0.940252	1083.56	3	22	23	55.8	V-type proton ATPase subunit B
PF3D7_0501000	0.956504	-0.0641565	0.739218	241.081	3	22	26	30.7	Plasmodium exported protein, unknown function
PF3D7_1132200	0.715642	-0.48269	2.63094e-06	12.9111	4	22	33	60.3	T-complex protein 1 subunit alpha
PF3D7_0929200	0.684361	-0.547171	0.000777384	22.454	3	22	28	33.6	RNA-binding protein, putative
PF3D7_1331800	0.590429	-0.760165	0.00794034	30.4574	3	22	29	15	60S ribosomal protein L23, putative
PF3D7_0307100	0.533267	-0.907071	0.000166043	19.1018	2	22	27	15.4	40S ribosomal protein S12, putative
PF3D7_1446500	0.321641	-1.63648	2.52593e-05	16.0352	3	22	23	346.9	conserved Plasmodium protein, unknown function
PF3D7_1238600	2.33608	1.22409	2.89634e-06	13.0242	3	21	23	46	sphingomyelin phosphodiesterase
PF3D7_1014100	2.1759	1.12161	1.94702e-09	7.63323	3	21	22	173.3	merozoite surface protein MSA180, putative
PF3D7_1010700	1.71701	0.7799	9.5361e-06	14.4125	3	21	26	25.7	dolichyl-phosphate-mannose--protein mannosyltransferase, putative
PF3D7_0414900	1.71346	0.776913	0.000256008	19.643	3	21	22	30.8	armadillo-domain containing rhoptry protein
PF3D7_1417200	1.19814	0.260791	0.0115595	32.1445	3	21	25	519.8	NOT family protein, putative
PF3D7_0526900	1.12021	0.163766	0.267619	77.2539	3	21	23	24.6	transmembrane emp24 domain-containing protein, putative
PF3D7_1366900	0.915683	-0.12708	0.672915	193.951	3	21	26	78.6	conserved Plasmodium protein, unknown function
PF3D7_1367500	1.66028	0.731427	0.00281652	26.1039	2	20	20	42.6	NADH-cytochrome b5 reductase, putative
PF3D7_0806800	1.37084	0.455056	7.72102e-06	13.7464	3	20	26	123	V-type proton ATPase subunit a, putative
PF3D7_0505700	1.36106	0.444733	0.00794034	30.2218	2	20	20	112.7	conserved Plasmodium membrane protein, unknown function
PF3D7_1119200	0.730157	-0.45372	0.15594	60.2311	2	20	20	17.6	conserved protein, unknown function
PF3D7_1340600	0.668559	-0.580872	0.00143379	23.5447	3	20	22	67.6	RNA lariat debranching enzyme, putative
PF3D7_0821700	0.556607	-0.845268	0.00886972	30.4991	3	20	24	16.4	60S ribosomal protein L22, putative
PF3D7_0407900	3.75384	1.90837	4.92786e-07	10.9709	2	19	19	77.8	AAA family ATPase, putative
PF3D7_1214100	3.56014	1.83194	5.93159e-08	9.31417	2	19	20	164.6	GPI ethanolamine phosphate transferase 3, putative
PF3D7_1331300	3.49214	1.80411	7.86949e-06	13.7726	2	19	20	21.1	signal peptidase 21 kDa subunit
PF3D7_0104200	2.42697	1.27916	2.36739e-05	15.2324	2	19	19	53.6	StAR-related lipid transfer protein
PF3D7_0903400	1.37039	0.454588	0.0806099	48.4695	2	19	20	300.9	ATP-dependent RNA helicase DDX60, putative
PF3D7_1106000	1.32994	0.411362	0.02783	37.4184	2	19	19	53.4	RuvB-like helicase 2
PF3D7_0720400	1.32016	0.400714	0.0832721	48.6864	3	19	24	72.7	ferrodoxin reductase-like protein
PF3D7_1225800	1.22234	0.289643	0.434051	108.364	3	19	19	131.8	ubiquitin-activating enzyme E1
PF3D7_1116400	4.02119	2.00762	1.16377e-08	7.34365	3	18	20	56.5	guanine nucleotide-exchange factor SEC12
PF3D7_0904400	2.54176	1.34583	5.88551e-07	10.6843	2	18	20	22.2	signal peptidase complex subunit 3, putative
PF3D7_1435400	1.60951	0.686625	0.0102854	30.94	2	18	18	21.8	ER membrane protein complex subunit 4, putative
PF3D7_1115600	1.58233	0.662047	4.71965e-05	15.8478	2	18	19	21.7	peptidyl-prolyl cis-trans isomerase
PF3D7_1353600	1.4876	0.572989	0.242709	72.7006	2	18	20	26.4	ER lumen protein retaining receptor
PF3D7_1455400	1.47417	0.559901	0.064244	45.2384	2	18	18	33.1	hemolysin III
PF3D7_1021400	1.40559	0.491174	0.00938432	30.4509	2	18	18	72.5	endomembrane protein 70, putative
PF3D7_0626100	1.33655	0.418512	0.000687616	21.1415	2	18	20	44.8	oxidoreductase, short-chain dehydrogenase family, putative
PF3D7_1457300	1.31458	0.394607	0.0259004	36.5804	2	18	19	76	conserved Plasmodium protein, unknown function
PF3D7_1439000	1.27356	0.348868	8.93357e-06	13.5003	2	18	20	27.2	copper transporter
PF3D7_1224000	1.13021	0.176596	0.392881	99.5597	2	18	20	45.9	GTP cyclohydrolase I
PF3D7_1362300	1.10072	0.138454	0.744011	245.321	1	18	20	22.1	conserved protein, unknown function
PF3D7_1211400	1.03222	0.0457512	0.846748	415.856	2	18	18	28.1	heat shock protein DNAJ homologue Pfj4
PF3D7_0501200	0.985297	-0.0213692	0.968865	2139.76	3	18	20	48.7	parasite-infected erythrocyte surface protein
PF3D7_1228600	0.953666	-0.0684437	0.731235	233.206	2	18	19	86.6	merozoite surface protein 9
PF3D7_0624600	0.911301	-0.134001	0.452662	112.387	2	18	18	315.6	SNF2 helicase, putative
PF3D7_0812500	0.899768	-0.152375	0.586915	153.963	2	18	20	117.1	RNA-binding protein, putative
PF3D7_1315400	0.813957	-0.296975	0.286245	80.1931	2	18	19	48	zinc finger (CCCH type) protein, putative
PF3D7_0402000	0.784477	-0.350197	0.692139	203.811	4	18	18	49.7	Plasmodium exported protein (PHISTa), unknown function
PF3D7_1343700	0.768672	-0.379561	0.0298492	37.741	2	18	20	83.7	kelch protein K13
PF3D7_1125500	0.532129	-0.910151	0.000319596	19.4054	2	18	19	14.3	small nuclear ribonucleoprotein Sm D1, putative
PF3D7_0627500	0.499706	-1.00085	0.000193822	17.8776	3	18	19	20.3	protein DJ-1
PF3D7_1323400	0.408224	-1.29257	6.28883e-05	15.8407	3	18	19	22.1	60S ribosomal protein L23
PF3D7_0405600	4.38701	2.13324	4.8493e-07	10.0081	2	17	17	37.8	conserved Plasmodium membrane protein, unknown function
PF3D7_1013800	4.05542	2.01985	2.10589e-07	9.32545	1	17	17	58.4	conserved Plasmodium protein, unknown function
PF3D7_0702400	2.08967	1.06327	0.00954387	30.1747	2	17	24	14.2	small exported membrane protein 1
PF3D7_0721100	1.9896	0.992479	2.50896e-06	11.5448	2	17	20	29.3	conserved Plasmodium protein, unknown function
PF3D7_0727800	1.79621	0.844958	0.00111608	22.0175	2	17	17	225.1	cation transporting ATPase, putative
PF3D7_0608310	1.56564	0.646755	0.051333	42.4901	2	17	17	53.7	sorting assembly machinery 50 kDa subunit, putative
PF3D7_1370300	1.52803	0.611678	0.0448212	41.0479	2	17	18	28.9	membrane associated histidine-rich protein
PF3D7_0318500	1.51681	0.601042	0.214293	68.0192	2	17	19	593.3	conserved Plasmodium protein, unknown function
PF3D7_1472300	1.50817	0.5928	0.00358671	25.9131	2	17	18	64.4	conserved Plasmodium membrane protein, unknown function
PF3D7_1359400	1.44715	0.533218	0.0815736	48.1187	2	17	18	57.1	CUGBP Elav-like family member 1
PF3D7_1127600	1.44239	0.528458	0.00176393	23.451	2	17	19	35	CRAL/TRIO domain-containing protein, putative
PF3D7_1327800	1.07737	0.107518	0.64718	179.224	2	17	17	64	ribose-phosphate pyrophosphokinase, putative
PF3D7_1446600	1.02327	0.033186	0.96328	1810.89	2	17	17	19.3	centrin-2
PF3D7_1464600	0.978003	-0.0320899	0.909719	738.968	2	17	19	170.5	serine/threonine protein phosphatase UIS2, putative
PF3D7_0308200	0.960128	-0.0587011	0.87555	511.533	2	17	17	59.6	T-complex protein 1 subunit eta
PF3D7_1103700	0.889932	-0.168233	0.357429	92.4315	2	17	19	28.4	casein kinase II beta chain
PF3D7_1133700	0.748932	-0.417093	0.281892	78.7509	3	17	17	120.5	FHA domain-containing protein, putative
PF3D7_1136300	0.672715	-0.571933	0.00254075	24.7126	2	17	18	128.5	tudor staphylococcal nuclease
PF3D7_1442300	0.651403	-0.618378	0.0304437	37.5958	2	17	17	46.4	tRNA import protein tRIP
PF3D7_1433500	0.624811	-0.678508	0.0331462	37.9348	3	17	22	169.2	DNA topoisomerase 2
PF3D7_1115800	0.51555	-0.955815	0.000505867	19.4555	3	17	18	33.9	conserved Plasmodium protein, unknown function
PF3D7_1124000	4.25271	2.08838	7.03959e-06	12.1792	2	16	18	55	endoplasmic reticulum oxidoreductin, putative
PF3D7_0919400	3.70185	1.88825	6.52741e-06	12.0858	2	16	16	61	protein disulfide isomerase
PF3D7_1414400	2.99949	1.58472	0.000285892	18.2073	2	16	19	34.9	serine/threonine protein phosphatase PP1
PF3D7_0320900	2.74824	1.45851	0.00108628	21.4575	2	16	19	16.5	histone H2A.Z
PF3D7_0108700	2.55293	1.35215	0.00116916	21.1574	3	16	22	135.6	secreted ookinete protein, putative
PF3D7_1455300	2.34222	1.22788	0.000199376	17.4247	2	16	18	69.5	conserved Plasmodium protein, unknown function
PF3D7_0720700	2.039	1.02786	0.00825985	29.0268	2	16	19	258.4	phosphoinositide-binding protein, putative
PF3D7_1234600	1.97655	0.982986	0.000861873	20.8086	2	16	16	134.5	protein TOC75, putative
PF3D7_0829200	1.9722	0.979805	2.20412e-06	10.8687	2	16	17	30.6	prohibitin, putative
PF3D7_1232100	1.84209	0.881344	1.31641e-05	13.01	2	16	18	81.5	60 kDa chaperonin
PF3D7_0419700	1.28847	0.365659	0.0154836	32.4437	2	16	16	38.8	apical merozoite protein
PF3D7_0703500	1.23673	0.306527	0.192003	64.051	3	16	18	264.9	erythrocyte membrane-associated antigen
PF3D7_1407900	1.19806	0.260695	0.421339	104.926	2	16	18	51.5	plasmepsin I
PF3D7_1408000	1.06386	0.089305	0.707791	213.811	2	16	20	51.5	plasmepsin II
PF3D7_1338100	1.01274	0.0182694	0.903407	675.061	2	16	16	59.1	26S proteasome regulatory subunit RPN3, putative
PF3D7_0108300	0.853011	-0.229364	0.357992	92.331	2	16	17	255	conserved Plasmodium protein, unknown function
PF3D7_1435300	0.850366	-0.233844	0.188869	63.9456	2	16	18	353.3	NAD(P)H-dependent glutamate synthase, putative
PF3D7_0804500	0.787779	-0.344137	0.306914	82.9531	3	16	16	721	conserved Plasmodium membrane protein, unknown function
PF3D7_1220900	0.78081	-0.356957	0.10778	52.0804	2	16	18	31	heterochromatin protein 1
PF3D7_0517400	0.730721	-0.452608	0.0936929	49.7636	2	16	17	132.7	FACT complex subunit SPT16, putative
PF3D7_1134800	0.722955	-0.468023	0.313418	84.4202	2	16	17	56.8	coatomer subunit delta
PF3D7_1033400	0.712767	-0.488497	0.0791581	47.311	2	16	17	32.8	haloacid dehalogenase-like hydrolase
PF3D7_1459000	0.699241	-0.516138	0.287971	79.9836	2	16	16	84.3	ATP-dependent RNA helicase DBP5
PF3D7_1461300	0.463	-1.11092	0.0251642	35.6512	2	16	16	7.5	40S ribosomal protein S28e, putative
PF3D7_1121600	0.387277	-1.36856	0.00564866	27.2351	2	16	16	17.3	exported protein 1
PF3D7_1352700	0.36557	-1.45178	6.7299e-06	12.1244	1	16	17	304.3	intron-binding protein aquarius, putative
PF3D7_0304400	0.328505	-1.60601	1.10396e-08	6.77969	1	16	17	12.2	60S ribosomal protein L44
PF3D7_0217800	0.239125	-2.06417	7.34243e-10	5.37248	2	16	20	12.5	40S ribosomal protein S26
PF3D7_1409400	2.99957	1.58475	1.91184e-05	12.8966	2	15	17	30.5	conserved Plasmodium membrane protein, unknown function
PF3D7_1366800	2.35188	1.23381	0.00567326	26.7672	2	15	16	42	phosphatidylserine synthase, putative
PF3D7_1340700	2.03772	1.02696	1.98514e-06	10.1436	2	15	17	25.9	ras-related protein Rab-11B
PF3D7_0603300	1.99537	0.996655	0.000301435	17.7513	2	15	16	65.6	dihydroorotate dehydrogenase
PF3D7_1310700	1.99534	0.996637	0.0020332	22.9459	2	15	16	16.5	RNA-binding protein, putative
PF3D7_0507500	1.7375	0.797013	0.0022107	23.2437	2	15	16	77.6	subtilisin-like protease 1
PF3D7_1454700	1.72581	0.787275	0.174877	61.6168	2	15	17	53	6-phosphogluconate dehydrogenase, decarboxylating, putative
PF3D7_1229300	1.49478	0.579931	0.015582	32.0364	2	15	17	117.5	conserved Plasmodium protein, unknown function
PF3D7_0407800	1.42634	0.512317	0.000932443	20.4928	2	15	24	230.1	conserved Plasmodium protein, unknown function
PF3D7_1119000	1.42584	0.511813	0.000879298	20.3156	2	15	17	43	acyl-CoA-binding protein, putative
PF3D7_0108000	1.18058	0.239495	0.549515	140.371	2	15	17	24.5	proteasome subunit beta type-3, putative
PF3D7_1010600	1.10341	0.141967	0.627337	169.253	2	15	16	25.3	eukaryotic translation initiation factor 2 subunit beta
PF3D7_1470900	1.07714	0.107204	0.796899	307.88	2	15	18	22.9	proteasome subunit beta type-2, putative
PF3D7_1446200	0.966533	-0.0491086	0.891021	588.357	2	15	16	67.8	M17 leucyl aminopeptidase
PF3D7_0921900	0.942416	-0.0855643	0.610129	161.766	1	15	16	29	conserved Plasmodium protein, unknown function
PF3D7_1453700	0.770357	-0.376401	0.341689	89.0317	2	15	19	30.5	co-chaperone p23
PF3D7_0810800	0.666007	-0.586392	0.0730969	45.8608	2	15	15	83.4	hydroxymethyldihydropterin pyrophosphokinase-dihydropteroate synthase
PF3D7_1143400	0.431389	-1.21294	1.15204e-05	12.2168	2	15	18	17.9	translation initiation factor eIF-1A, putative
PF3D7_0309300	0.357442	-1.48422	0.00152048	21.9614	2	15	16	112.2	N2227-like protein, putative
PF3D7_1328100	0.150552	-2.73166	2.29142e-10	4.3595	2	15	16	30	proteasome subunit beta type-7, putative
PF3D7_0415700	1.89497	0.922173	5.17655e-06	10.4942	2	14	19	56	conserved Plasmodium protein, unknown function
PF3D7_0219600	1.80727	0.85381	1.1521e-05	10.7159	3	14	19	104.2	replication factor C subunit 1, putative
PF3D7_0822600	1.19299	0.25458	0.283816	78.4336	2	14	15	86.2	protein transport protein SEC23
PF3D7_0532100	1.03149	0.0447279	0.803758	318.211	2	14	17	19	early transcribed membrane protein 5
PF3D7_1218500	0.968979	-0.0454621	0.86688	473.154	2	14	14	122.8	dynamin-like protein, putative
PF3D7_1135400	0.722963	-0.468007	0.0298492	36.1038	2	14	19	28.5	conserved Plasmodium protein, unknown function
PF3D7_0811400	0.639364	-0.645291	0.00114033	20.4181	2	14	16	71.4	conserved protein, unknown function
PF3D7_0527500	0.409766	-1.28713	0.0045006	25.1945	2	14	16	51.1	Hsc70-interacting protein
PF3D7_1251200	3.56274	1.83299	2.78862e-07	6.95338	2	13	16	69	coronin
PF3D7_1107300	3.14292	1.65211	3.95475e-05	12.4549	2	13	15	381.9	polyadenylate-binding protein-interacting protein 1, putative
PF3D7_1423800	2.14986	1.10424	0.000207908	15.4586	2	13	14	176.7	vacuolar protein sorting-associated protein 3, putative
PF3D7_0504000	2.08889	1.06274	4.61603e-05	12.7108	2	13	13	283	cation transporting P-ATPase
PF3D7_1458300	1.84186	0.881167	0.000118013	14.3437	2	13	15	183.5	conserved Plasmodium protein, unknown function
PF3D7_0932200	1.50482	0.589589	0.218267	67.1287	2	13	14	19	profilin
PF3D7_1223700	1.23457	0.304009	0.305486	81.7911	2	13	13	31	vacuolar iron transporter
PF3D7_1354400	0.885349	-0.175682	0.245205	71.3632	2	13	14	19.1	V-type proton ATPase 21 kDa proteolipid subunit, putative
PF3D7_1123500	0.824983	-0.277563	0.481681	118.79	2	13	14	153.7	conserved Plasmodium protein, unknown function
PF3D7_1203900	0.734488	-0.44519	0.020531	32.6241	1	13	15	16.5	ubiquitin-conjugating enzyme E2
PF3D7_0731600	0.556698	-0.845033	0.000711682	18.3359	2	13	15	93.3	acyl-CoA synthetase
PF3D7_0503400	0.312047	-1.68016	2.05695e-08	5.2221	1	13	16	13.7	actin-depolymerizing factor 1
PF3D7_1241700	6.09753	2.60822	1.18475e-05	9.82266	2	12	14	37.6	replication factor C subunit 4, putative
PF3D7_0109000	2.51735	1.33191	5.10231e-05	11.9321	2	12	15	25.5	photosensitized INA-labeled protein PHIL1, putative
PF3D7_1315600	1.95542	0.967475	0.0315014	35.2322	2	12	13	23.9	CDP-diacylglycerol--inositol 3-phosphatidyltransferase
PF3D7_0414300	1.44072	0.526794	0.00701161	25.619	2	12	13	13.2	Rab5-interacting protein, putative
PF3D7_1368200	1.17101	0.227752	0.399491	98.6325	2	12	14	70.3	ABC transporter E family member 1, putative
PF3D7_0212300	0.752161	-0.410887	0.167597	59.0069	2	12	14	48.1	peptide chain release factor subunit 1, putative
PF3D7_1350100	0.590804	-0.759249	0.0109421	27.9674	2	12	13	67.6	lysine--tRNA ligase
PF3D7_0724100	0.358747	-1.47896	0.0564327	40.9958	2	12	13	124.1	conserved Plasmodium protein, unknown function
PF3D7_1366600	2.026	1.01863	0.0139209	28.3733	2	11	13	65.8	signal recognition particle receptor subunit alpha, putative
PF3D7_0303000	1.91094	0.934286	0.00369065	21.8119	2	11	13	89.1	N-ethylmaleimide-sensitive fusion protein
PF3D7_1228800	1.83744	0.877697	0.0294276	33.6445	2	11	12	378.9	WD repeat-containing protein, putative
PF3D7_1453800	1.7989	0.847115	0.0290634	33.5248	2	11	11	107	glucose-6-phosphate dehydrogenase-6-phosphogluconolactonase
PF3D7_0220000	1.08623	0.119323	0.428813	104.078	2	11	13	175.7	liver stage antigen 3
PF3D7_1149400	0.748297	-0.418318	0.2647	73.2959	2	11	14	25.4	Plasmodium exported protein, unknown function
PF3D7_1403900	0.594623	-0.749954	0.0298492	33.8163	2	11	13	35.2	serine/threonine protein phosphatase CPPED1, putative
PF3D7_0501300	0.522494	-0.936515	0.253741	71.4527	2	11	13	36.3	skeleton-binding protein 1
PF3D7_0518300	0.515958	-0.954675	0.00613592	23.9734	2	11	12	27.3	proteasome subunit beta type-1, putative
PF3D7_0207400	0.485569	-1.04225	0.0287471	33.4306	2	11	12	109.6	serine repeat antigen 7
PF3D7_0907900	9.81524	3.29502	3.07538e-05	10.0327	1	10	10	28.4	peptide deformylase
PF3D7_1331600	6.09041	2.60654	7.02541e-05	11.3524	1	10	10	26.4	protein tyrosine phosphatase-like protein, putative
PF3D7_0518200	4.68986	2.22954	0.0020935	19.7278	1	10	10	15.5	SWIB/MDM2 domain-containing protein
PF3D7_1455700	4.60218	2.20232	9.86338e-06	8.49795	1	10	10	126.1	conserved Plasmodium protein, unknown function
PF3D7_1345600	3.60039	1.84815	7.4614e-05	11.4519	1	10	10	43.2	inner membrane complex protein
PF3D7_0914500	3.55422	1.82953	3.58117e-06	7.33002	1	10	10	204.7	conserved Plasmodium protein, unknown function
PF3D7_1427000	3.47099	1.79535	3.37573e-05	10.1643	1	10	10	140.5	conserved Plasmodium protein, unknown function
PF3D7_0508500	3.09784	1.63126	0.00794367	25.2345	1	10	10	304.1	guanidine nucleotide exchange factor
PF3D7_1208500	2.80854	1.48982	0.00014613	12.6935	1	10	10	208.7	conserved Plasmodium protein, unknown function
PF3D7_0704300	2.49525	1.31919	0.00315685	21.2059	1	10	10	217.5	conserved Plasmodium membrane protein, unknown function
PF3D7_1240100	2.06771	1.04803	0.0179339	29.996	1	10	10	11.7	early transcribed membrane protein 12
PF3D7_1465000	2.00367	1.00265	0.000247916	12.4078	2	10	12	33.3	conserved Plasmodium protein, unknown function
PF3D7_0205400	1.98231	0.987181	8.45204e-05	11.6779	1	10	10	54.4	PCI domain-containing protein, putative
PF3D7_0803700	1.95745	0.968978	0.00567326	23.5928	1	10	10	51.6	tubulin gamma chain
PF3D7_1436300	1.94164	0.957273	0.000843512	16.7543	1	10	10	112.4	translocon component PTEX150
PF3D7_0508300	1.93896	0.955281	0.139888	54.1945	1	10	10	39	triose phosphate transporter
PF3D7_0828800	1.80411	0.851291	0.000677557	16.1608	1	10	10	85.2	GPI-anchored micronemal antigen
PF3D7_0306700	1.78762	0.838041	0.000102923	12.0338	1	10	10	0
PF3D7_1212000	1.76533	0.81994	0.00963277	26.2694	1	10	10	24	glutathione peroxidase-like thioredoxin peroxidase
PF3D7_0425300	1.70254	0.767688	0.0115705	27.3006	1	10	10	27.5	Plasmodium exported protein (PHISTa), unknown function, pseudogene
PF3D7_1213800	1.65977	0.730987	0.100179	48.0879	1	10	10	86.6	proline--tRNA ligase
PF3D7_1471400	1.57708	0.65726	0.000206993	13.3844	1	10	10	57.6	diacylglycerol kinase, putative
PF3D7_1369000	1.53521	0.618433	0.0475538	38.2518	1	10	10	94.7	glycosylphosphatidylinositol anchor attachment 1 protein, putative
PF3D7_1239700	1.52	0.60407	0.045095	36.5308	2	10	11	101	ATP-dependent zinc metalloprotease FTSH 1
PF3D7_0607000	1.49402	0.579202	0.269329	74.1673	1	10	10	112.4	translation initiation factor IF-2, putative
PF3D7_0318200	1.2633	0.337202	0.200053	63.0512	1	10	10	278.7	DNA-directed RNA polymerase II subunit RPB1
PF3D7_1409900	1.19498	0.256985	0.0332925	34.7851	1	10	10	78	cytidine diphosphate-diacylglycerol synthase
PF3D7_1434800	1.17101	0.227754	0.460538	111.232	1	10	10	28.9	mitochondrial acidic protein MAM33, putative
PF3D7_1012800	1.11318	0.154693	0.229133	67.5733	1	10	10	102.2	conserved Plasmodium protein, unknown function
PF3D7_1463400	1.0968	0.133301	0.729225	227.198	1	10	10	39.1	DNA-directed RNA polymerase III subunit RPC4, putative
PF3D7_0315100	1.07471	0.103948	0.81926	349.726	1	10	10	26.9	eukaryotic translation initiation factor 4E
PF3D7_1215400	1.02953	0.0419798	0.891021	582.835	1	10	10	71.5	conserved Plasmodium protein, unknown function
PF3D7_0712900	0.966221	-0.0495742	0.909448	720.112	1	10	10	248.9	erythrocyte membrane protein 1, PfEMP1
PF3D7_1408700	0.960451	-0.0582162	0.830381	369.913	1	10	10	851.9	conserved protein, unknown function
PF3D7_1445700	0.911519	-0.133655	0.893862	606.209	2	10	19	41.9	conserved Plasmodium protein, unknown function
PF3D7_0519900	0.878543	-0.186816	0.404224	99.0037	1	10	10	62.8	conserved Plasmodium protein, unknown function
PF3D7_0320100	0.853846	-0.227952	0.317396	82.8194	1	10	10	25.9	protein transport protein SEC22
PF3D7_1129100	0.764129	-0.388112	0.22727	67.2512	1	10	10	52	parasitophorous vacuolar protein 1
PF3D7_0113900	0.728462	-0.457074	0.0132574	28.0956	1	10	10	28.2	CX3CL1-binding protein 1
PF3D7_0916500	0.652559	-0.61582	0.000879298	16.8877	1	10	10	34.9	ubiquitin fusion degradation protein 1
PF3D7_1016300	0.645951	-0.630503	0.294013	77.6002	2	10	10	95.8	GBP130 protein
PF3D7_0815600	0.590494	-0.760007	0.0621088	41.1997	1	10	10	31.3	eukaryotic translation initiation factor 3 subunit G, putative
PF3D7_1019400	0.556866	-0.844598	0.0362731	35.5473	1	10	10	11.8	60S ribosomal protein L30e, putative
PF3D7_0813000	0.500994	-0.997134	0.00316511	21.2232	1	10	10	70.7	conserved Plasmodium protein, unknown function
PF3D7_1025000	0.391921	-1.35136	8.98024e-05	11.7871	1	10	10	116.3	EF-hand calcium-binding domain-containing protein, putative
PF3D7_0733000	0.356536	-1.48788	0.00027658	14.0411	1	10	10	294.6	erythrocyte membrane protein 1, PfEMP1
PF3D7_1001500	0.267385	-1.90301	0.000133895	12.534	1	10	10	11.3	early transcribed membrane protein 10.1
PF3D7_1313600	11.14	3.47768	1.42368e-07	3.73389	1	9	10	240.6	conserved Plasmodium protein, unknown function
PF3D7_1020200	4.5146	2.1746	9.29007e-05	10.5083	1	9	9	99.1	conserved Plasmodium protein, unknown function
PF3D7_1409800	3.99039	1.99653	2.07913e-05	8.19199	1	9	10	59.3	CUGBP Elav-like family member 2, putative
PF3D7_1457500	3.82366	1.93495	0.0010683	16.082	1	9	9	48.3	vacuolar protein sorting-associated protein 4
PF3D7_0823600	3.22243	1.68815	8.16348e-06	7.01421	1	9	10	51.6	lipoate-protein ligase B
PF3D7_1345700	3.09886	1.63174	0.00166477	17.5402	1	9	9	53.6	isocitrate dehydrogenase [NADP], mitochondrial
PF3D7_0103200	3.01053	1.59002	0.000977315	15.8401	1	9	9	50	nucleoside transporter 4
PF3D7_0210600	2.84915	1.51053	0.00447734	21.2316	1	9	9	53.7	conserved Plasmodium protein, unknown function
PF3D7_1348000	2.61396	1.38624	0.00812076	24.061	1	9	9	150	conserved Plasmodium protein, unknown function
PF3D7_1129400	2.55892	1.35553	0.0017669	17.7571	1	9	10	74.4	rRNA (cytosine-C(5))-methyltransferase, putative
PF3D7_0801900	2.47616	1.3081	0.0162334	28.0893	1	9	10	552	lysine-specific histone demethylase, putative
PF3D7_1412500	2.46298	1.30041	0.00825985	24.16	1	9	10	42.6	actin II
PF3D7_1019900	2.33009	1.22039	0.00248376	19.0066	1	9	9	14.7	autophagy-related protein 8
PF3D7_0108800	2.29036	1.19558	0.000238497	12.3267	1	9	10	42.5	conserved Plasmodium protein, unknown function
PF3D7_1330600	2.19034	1.13115	2.35782e-05	8.35203	1	9	10	57.6	elongation factor Tu, putative
PF3D7_1007000	2.09392	1.06621	5.87945e-05	9.72183	1	9	9	30.1	transmembrane protein 147, putative
PF3D7_1324700	2.05525	1.03932	0.00974465	25.0643	1	9	10	25.7	SNARE protein, putative
PF3D7_0819600	2.05211	1.03711	0.000643754	14.6666	1	9	9	32.2	conserved Plasmodium protein, unknown function
PF3D7_1311500	1.99017	0.992888	0.000291145	12.8006	1	9	10	46.8	26S protease regulatory subunit 7, putative
PF3D7_0524400	1.90754	0.93171	0.000132478	11.1548	1	9	10	40.7	ribosome-interacting GTPase 1, putative
PF3D7_1426700	1.86877	0.902093	0.000861873	15.4593	1	9	10	134	phosphoenolpyruvate carboxylase
PF3D7_0807800	1.86724	0.90091	0.00494138	21.663	1	9	10	55.1	26S proteasome regulatory subunit RPN10, putative
PF3D7_1021300	1.82209	0.865598	0.00113704	16.2787	1	9	10	55.2	apicoplast integral membrane protein, putative
PF3D7_1143200	1.77764	0.829963	0.0972177	46.5843	1	9	9	39.4	DnaJ protein, putative
PF3D7_0316500	1.7169	0.779807	1.83364e-05	8.02542	1	9	10	54.7	kinetochore protein NUF2, putative
PF3D7_0519000	1.71689	0.779794	3.87228e-05	9.06064	1	9	10	35.7	histone RNA hairpin-binding protein, putative
PF3D7_1426100	1.69518	0.761436	0.105792	47.9346	1	9	10	19.4	transcription factor BTF3, putative
PF3D7_0111500	1.66618	0.736543	0.00190434	18.0241	1	9	9	44.2	UMP-CMP kinase, putative
PF3D7_1321400	1.66616	0.736525	0.00756925	23.6695	1	9	9	36.5	palmitoyltransferase DHHC8, putative
PF3D7_1479400	1.54542	0.628002	0.0420256	35.7789	1	9	10	40.3	rifin
PF3D7_1456700	1.47983	0.565428	0.153604	55.2628	1	9	9	77.8	conserved Plasmodium protein, unknown function
PF3D7_1236400	1.4562	0.542209	0.00180629	17.8317	1	9	10	73.1	conserved Plasmodium protein, unknown function
PF3D7_0504600	1.43507	0.521121	0.0211096	29.9011	1	9	9	43	2-oxoisovalerate dehydrogenase subunit beta, mitochondrial, putative
PF3D7_0824400	1.38741	0.472398	0.0661769	40.9281	1	9	10	67.6	nucleoside transporter 2
PF3D7_1250200	1.36641	0.450386	0.160874	56.3448	1	9	9	121.3	CSC1-like protein, putative
PF3D7_0512700	1.33168	0.413243	0.0309339	32.9858	1	9	10	33	orotate phosphoribosyltransferase
PF3D7_1235200	1.2907	0.368152	0.0730969	42.2563	1	9	10	117.1	V-type K+-independent H+-translocating inorganic pyrophosphatase
PF3D7_1450100	1.2748	0.350271	0.255204	70.8915	1	9	9	56	signal recognition particle subunit SRP54
PF3D7_0823300	1.26921	0.343927	0.343099	86.3633	1	9	10	170.9	histone acetyltransferase GCN5
PF3D7_0731300	1.26278	0.336603	0.0475538	37.1273	1	9	10	37.7	Plasmodium exported protein (PHISTb), unknown function
PF3D7_0717700	1.2211	0.288185	0.334014	84.7534	1	9	9	62.5	serine--tRNA ligase, putative
PF3D7_0109850	1.19538	0.257472	0.472129	113.633	1	9	10	70.9	phosphatidate cytidylyltransferase, putative
PF3D7_0925700	1.13945	0.18834	0.300119	78.6354	1	9	10	51.4	histone deacetylase 1
PF3D7_1326200	1.12413	0.168814	0.471362	113.328	1	9	10	32.1	conserved Plasmodium protein, unknown function
PF3D7_1438400	1.06886	0.0960718	0.624136	164.005	1	9	10	237.8	metacaspase-like protein
PF3D7_1236100	1.05036	0.0708844	0.793788	298.082	1	9	9	51.5	clustered-asparagine-rich protein
PF3D7_1344800	1.04809	0.0677597	0.80476	320.042	1	9	9	43.3	aspartate carbamoyltransferase
PF3D7_1427900	1.04193	0.0592618	0.784437	284.58	1	9	10	33	leucine-rich repeat protein
PF3D7_1110100	1.03767	0.0533437	0.740519	236.603	1	9	10	101.2	conserved Plasmodium protein, unknown function
PF3D7_0821800	1.03159	0.0448689	0.87953	526.149	1	9	10	8.6	protein transport protein SEC61 subunit beta, putative
PF3D7_1366500	1.031	0.0440466	0.778528	274.687	1	9	10	17	nucleoside diphosphate kinase
PF3D7_1345100	1.02013	0.0287534	0.832447	373.584	1	9	10	18.6	thioredoxin 2
PF3D7_0606000	1.01562	0.0223553	0.912388	751.896	1	9	10	123.3	conserved Plasmodium protein, unknown function
PF3D7_1344200	1.00324	0.00466986	0.979167	3340.22	1	9	10	108.2	heat shock protein 110, putative
PF3D7_0909700	0.992978	-0.0101661	0.98295	4515.71	1	9	9	120.1	FHA domain protein, putative
PF3D7_0724500	0.968588	-0.0460444	0.648253	175.866	1	9	9	36.6	conserved Plasmodium protein, unknown function
PF3D7_1368100	0.959696	-0.0593505	0.80476	319.538	1	9	10	35.2	26S proteasome regulatory subunit RPN11, putative
PF3D7_1438000	0.950073	-0.0738892	0.731571	227.237	2	9	11	76.8	eukaryotic translation initiation factor eIF2A, putative
PF3D7_0611600	0.935462	-0.0962485	0.802048	310.33	1	9	10	76.7	basal complex transmembrane protein 1
PF3D7_1315000	0.920796	-0.119047	0.476128	114.936	1	9	10	25	conserved Plasmodium protein, unknown function
PF3D7_1037700	0.914218	-0.129389	0.479416	115.96	1	9	10	12.3	enhancer of rudimentary homolog, putative
PF3D7_0419800	0.896263	-0.158006	0.252774	70.298	1	9	10	27.6	60S ribosomal protein L7ae/L30e, putative
PF3D7_1337000	0.871024	-0.199215	0.367959	90.9708	1	9	10	115.5	mitochondrial intermediate peptidase, putative
PF3D7_1360800	0.839706	-0.252044	0.283295	75.6655	1	9	10	138.9	falcilysin
PF3D7_0902800	0.830845	-0.267349	0.18171	59.3864	1	9	10	105.5	serine repeat antigen 9
PF3D7_0529000	0.817951	-0.289914	0.486645	117.152	2	9	14	82.9	conserved Plasmodium protein, unknown function
PF3D7_0614300	0.8175	-0.290709	0.142331	53.5687	1	9	9	97	major facilitator superfamily-related transporter, putative
PF3D7_1404100	0.798136	-0.325293	0.392881	95.6748	1	9	9	12.9	cytochrome c, putative
PF3D7_1342400	0.788884	-0.342115	0.170346	57.7365	1	9	10	45.3	casein kinase II beta chain
PF3D7_1342800	0.712729	-0.488574	0.0453477	36.5988	1	9	10	66.2	phosphoenolpyruvate carboxykinase
PF3D7_0621800	0.701065	-0.51238	0.108778	48.4724	1	9	10	20.6	nascent polypeptide-associated complex subunit alpha, putative
PF3D7_0727400	0.693295	-0.528458	0.0640019	40.4742	1	9	9	28.4	proteasome subunit alpha type-5, putative
PF3D7_1432500	0.682837	-0.550387	0.0100733	25.239	1	9	10	51.8	RNA methyltransferase, putative
PF3D7_1353100	0.646215	-0.629914	0.408767	99.0574	1	9	9	32.8	Plasmodium exported protein, unknown function
PF3D7_1402300	0.634173	-0.657052	2.64547e-05	8.52263	1	9	10	78.4	26S proteasome regulatory subunit RPN6
PF3D7_0217100	0.618053	-0.694198	0.214293	64.2355	1	9	10	61.8	ATP synthase F1, alpha subunit
PF3D7_0812400	0.601095	-0.734335	0.00155437	17.3074	1	9	9	61.2	karyopherin alpha
PF3D7_0910100	0.594053	-0.751336	0.00576328	22.3811	1	9	10	139.2	exportin-7, putative
PF3D7_1121300	0.589538	-0.762343	0.0380924	34.8466	1	9	10	200.4	tyrosine kinase-like protein
PF3D7_1329500	0.581059	-0.783243	0.001464	17.0957	1	9	10	218.4	conserved Plasmodium protein, unknown function
PF3D7_0821400	0.568579	-0.814567	0.0266467	30.08	2	9	12	14.1	conserved Plasmodium protein, unknown function
PF3D7_0802200	0.532516	-0.909104	0.00022042	12.1637	1	9	10	25.2	1-cys peroxiredoxin
PF3D7_0503800	0.523091	-0.934865	9.4172e-06	7.18771	1	9	10	14.1	60S ribosomal protein L31
PF3D7_1002900	0.50042	-0.998787	0.00850748	24.3385	1	9	9	14.5	conserved Plasmodium protein, unknown function
PF3D7_1352000	0.49395	-1.01756	0.0146487	27.4486	1	9	9	240	conserved Plasmodium protein, unknown function
PF3D7_0936000	0.454159	-1.13873	0.0315835	33.1753	1	9	9	10.8	ring-exported protein 2
PF3D7_0616100	0.376783	-1.40819	0.00895546	24.6026	1	9	10	17.5	conserved Plasmodium protein, unknown function
PF3D7_1407300	0.265018	-1.91584	0.00146041	17.0811	1	9	9	81.8	pre-mRNA-splicing factor 38B, putative
PF3D7_1471600	0.227753	-2.13446	6.88577e-05	9.98525	1	9	9	136.2	conserved Plasmodium protein, unknown function
PF3D7_0419600	0.221293	-2.17597	0.0015831	17.3762	1	9	9	33.2	ran-specific GTPase-activating protein 1, putative
PF3D7_1252400	0.111706	-3.16223	0.0220205	30.2047	1	9	10	340.5	reticulocyte binding protein homologue 3, pseudogene
PF3D7_1364400	0.097282	-3.36168	8.56304e-05	10.3672	1	9	9	386.3	conserved Plasmodium protein, unknown function
PF3D7_1105800	24.1607	4.59459	5.0401e-05	7.90879	1	8	9	30.7	conserved Apicomplexan protein, unknown function
PF3D7_0514100	10.901	3.44639	8.21017e-05	8.68657	1	8	9	170.3	ATP-dependent DNA helicase UvrD
PF3D7_1444100	9.95875	3.31596	1.45182e-05	6.26596	1	8	8	865	conserved Plasmodium protein, unknown function
PF3D7_0609800	9.61614	3.26546	1.62265e-05	6.39956	1	8	8	33.1	palmitoyltransferase DHHC2, putative
PF3D7_1205400	7.94322	2.98972	0.00482709	19.8723	1	8	8	128.5	kelch domain-containing protein, putative
PF3D7_0616700	7.75739	2.95557	2.70391e-06	4.55579	1	8	8	61.9	ras GTPAse, putative
PF3D7_1104200	6.39473	2.67688	2.58792e-05	6.96926	1	8	8	167.4	chromatin remodeling protein
PF3D7_1139500	4.66553	2.22204	0.00171591	15.9318	1	8	9	75.1	AAA family ATPase, putative, unspecified product
PF3D7_1021900	3.66062	1.87209	1.37984e-05	6.20748	1	8	10	267.4	PHAX domain-containing protein, putative
PF3D7_0103900	3.55901	1.83148	0.000756557	13.3934	1	8	8	67.8	parasite-infected erythrocyte surface protein
PF3D7_1139100	3.03553	1.60195	0.0601052	38.2571	1	8	8	209.8	RNA-binding protein, putative
PF3D7_0622600	2.79226	1.48143	0.000815824	13.5932	1	8	10	11.7	cytochrome b-c1 complex subunit 9, putative
PF3D7_0713700	2.78575	1.47807	0.00794034	22.2559	1	8	8	24.4	conserved Plasmodium protein, unknown function
PF3D7_1310600	2.77601	1.47301	0.0475538	35.6274	1	8	10	23.4	ras-related protein Rab-5B
PF3D7_1125800	2.7519	1.46043	0.000359993	11.5854	1	8	8	67.6	kelch domain-containing protein, putative
PF3D7_0211200	2.59452	1.37547	0.00122551	14.8454	1	8	8	26.7	ras-related protein Rab-5A
PF3D7_1314200	2.51701	1.33171	0.00026234	10.8797	1	8	10	304.1	telomerase reverse transcriptase
PF3D7_1335800	2.32887	1.21963	0.122729	49.2711	1	8	8	73.6	conserved Plasmodium protein, unknown function
PF3D7_1017900	2.14492	1.10093	0.00182336	16.1565	1	8	8	55.2	26S proteasome regulatory subunit p55, putative
PF3D7_1410900	2.08362	1.05909	0.00645411	21.2229	1	8	9	74.9	ribosome maturation protein SBDS, putative
PF3D7_1316600	2.05779	1.04109	0.00150208	15.4728	1	8	9	104.8	choline-phosphate cytidylyltransferase
PF3D7_1472100	1.948	0.961995	0.0018405	16.1929	1	8	9	36.3	protein transport protein YIP1, putative
PF3D7_0318900	1.92111	0.941943	0.000209333	10.4014	1	8	10	53.1	conserved protein, unknown function
PF3D7_0419900	1.82137	0.865026	1.29562e-05	6.13239	1	8	10	611.7	phosphatidylinositol 4-kinase, putative
PF3D7_0914700	1.78847	0.838729	0.0188553	27.4977	1	8	8	58.4	major facilitator superfamily-related transporter, putative
PF3D7_1342100	1.78078	0.832507	0.0155704	26.2089	1	8	10	103.4	aconitate hydratase
PF3D7_0613900	1.77825	0.830457	0.0547356	37.2234	1	8	8	255.1	myosin E, putative
PF3D7_1022100	1.63236	0.706963	0.313461	79.9898	1	8	8	30.5	methyltransferase, putative
PF3D7_0802300	1.57356	0.654034	0.0490964	35.9862	1	8	10	129.1	periodic tryptophan protein 2, putative
PF3D7_1361700	1.5435	0.626206	0.085563	43.1432	1	8	10	27.3	cytochrome c oxidase subunit 2, putative
PF3D7_0107500	1.54063	0.623522	0.0510461	34.3922	2	8	10	170.3	lipid/sterol:H+ symporter
PF3D7_0418200	1.53855	0.621568	0.0370045	33.0525	1	8	10	51	eukaryotic translation initiation factor 3 subunit M, putative
PF3D7_1410300	1.52721	0.610898	0.0493342	36.0507	1	8	10	526.7	WD repeat-containing protein, putative
PF3D7_0831600	1.51052	0.595047	0.0241678	29.3022	1	8	9	165.6	cytoadherence linked asexual protein 8
PF3D7_1003800	1.41288	0.498644	0.0264606	30.0015	1	8	9	142.9	U5 small nuclear ribonucleoprotein component, putative
PF3D7_1464700	1.39966	0.485074	0.000271664	10.9656	1	8	10	44.5	ATP synthase (C/AC39) subunit, putative
PF3D7_1445100	1.3395	0.421693	0.00611532	20.9709	1	8	10	133.7	histidine--tRNA ligase, putative
PF3D7_1118100	1.31908	0.399529	0.229133	65.4765	1	8	10	18.2	AP-1 complex subunit sigma, putative
PF3D7_1007300	1.30958	0.3891	0.0420256	34.2752	1	8	10	77.1	RING zinc finger protein, putative
PF3D7_1313800	1.25953	0.332888	0.0954327	44.8737	1	8	8	408.8	conserved Plasmodium membrane protein, unknown function
PF3D7_0803600	1.22152	0.288678	0.767025	258.637	1	8	8	190.8	conserved Plasmodium protein, unknown function
PF3D7_0415200	1.21572	0.281816	0.381064	92.2222	1	8	10	261.8	conserved Plasmodium protein, unknown function
PF3D7_1339400	1.21175	0.277093	0.0127769	24.9828	1	8	10	17.8	conserved Plasmodium protein, unknown function
PF3D7_1355800	1.16017	0.214335	0.463597	110.316	1	8	8	10.1	splicing factor 3B subunit 5, putative
PF3D7_1145100	1.08857	0.12243	0.402256	96.4766	1	8	10	124.4	coatomer subunit gamma, putative
PF3D7_0710600	1.08152	0.113064	0.543814	131.626	2	8	12	17.4	60S ribosomal protein L34
PF3D7_0926700	1.0702	0.0978757	0.692918	199.079	1	8	8	97.8	glutamine-dependent NAD(+) synthetase, putative
PF3D7_1102700	1.04302	0.0607646	0.834856	377.425	1	8	8	10.2	early transcribed membrane protein 11.1
PF3D7_1401400	1.00995	0.0142876	0.961464	1619.27	1	8	9	11.4	early transcribed membrane protein 14.1
PF3D7_0302900	1.00801	0.0115058	0.979167	3291.54	1	8	10	147.9	exportin-1, putative
PF3D7_1135900	0.976336	-0.034551	0.923795	850.214	1	8	10	35.5	3-oxo-5-alpha-steroid 4-dehydrogenase, putative
PF3D7_0616800	0.975916	-0.0351716	0.891021	580.293	1	8	8	59.5	malate:quinone oxidoreductase, putative
PF3D7_0727000	0.96878	-0.0457597	0.717215	214.269	1	8	10	136.9	vacuolar protein sorting-associated protein 53, putative
PF3D7_1408300	0.96506	-0.0513094	0.860086	440.577	1	8	10	18	conserved Plasmodium protein, unknown function
PF3D7_1309500	0.957417	-0.0627812	0.893578	596.403	1	8	10	25	H/ACA ribonucleoprotein complex subunit 1, putative
PF3D7_0214100	0.894759	-0.160429	0.474435	113.084	1	8	15	166.7	protein transport protein SEC31
PF3D7_0823900	0.82954	-0.269617	0.315434	80.3624	1	8	9	35.4	dicarboxylate/tricarboxylate carrier
PF3D7_1123900	0.813548	-0.2977	0.321211	81.4685	1	8	8	16	13 kDa ribonucleoprotein-associated protein, putative
PF3D7_1439300	0.801963	-0.318392	0.229133	65.438	1	8	10	220.7	Sad1/UNC domain-containing protein, putative
PF3D7_1317000	0.798377	-0.324857	0.585608	147.845	1	8	8	74.6	U4/U6.U5 tri-snRNP-associated protein 2, putative
PF3D7_0721800	0.798049	-0.325451	0.111791	47.5832	1	8	10	12.4	conserved Plasmodium protein, unknown function
PF3D7_1408400	0.789902	-0.340254	0.216649	63.3769	1	8	8	135.5	FANCJ-like helicase, putative
PF3D7_0619500	0.7574	-0.400872	0.534494	130.392	1	8	8	163.9	acyl-CoA synthetase
PF3D7_0914200	0.756776	-0.402061	0.0442033	34.8187	1	8	10	49.3	phospholipid or glycerol acyltransferase, putative
PF3D7_0319700	0.724617	-0.46471	0.00667168	21.3776	1	8	10	375.8	ABC transporter I family member 1, putative
PF3D7_1312900	0.688636	-0.538186	0.0882166	43.6294	1	8	10	146.6	eukaryotic translation initation factor 4 gamma
PF3D7_1142300	0.687351	-0.540881	0.00202386	16.5341	1	8	10	216	conserved Plasmodium membrane protein, unknown function
PF3D7_0624400	0.662081	-0.594921	0.00681734	21.4827	1	8	10	73.1	conserved Plasmodium protein, unknown function
PF3D7_0608500	0.623623	-0.681255	0.151707	53.6061	1	8	10	26.5	proteasome subunit alpha type-2, putative
PF3D7_1466700	0.615922	-0.699182	7.64554e-05	8.56416	1	8	10	20.4	60S ribosome subunit biogenesis protein NIP7, putative
PF3D7_0532400	0.569205	-0.812979	0.00114612	14.6112	1	8	10	61.1	lysine-rich membrane-associated PHISTb protein
PF3D7_1208800	0.561922	-0.831559	0.418639	99.835	1	8	9	139	zinc finger protein, putative
PF3D7_1326400	0.552108	-0.856978	0.0115595	24.3884	1	8	8	55	translation initiation factor eIF-2B subunit gamma, putative
PF3D7_1474800	0.550471	-0.861261	0.013031	25.1135	1	8	8	28.8	proteasome subunit alpha type-1, putative
PF3D7_1124700	0.534871	-0.902737	0.0173567	26.9449	1	8	8	35	GrpE protein homolog, mitochondrial, putative
PF3D7_0106000	0.505839	-0.983249	0.0112411	24.2196	1	8	9	109.3	conserved Plasmodium protein, unknown function
PF3D7_1226300	0.502552	-0.992655	0.00258063	17.4431	1	8	10	33.3	haloacid dehalogenase-like hydrolase, putative
PF3D7_1137300	0.502403	-0.993084	0.00291594	17.8768	1	8	8	81.6	CLPTM1 domain-containing protein, putative
PF3D7_0417200	0.432804	-1.20821	0.00841091	22.6052	1	8	10	71.7	bifunctional dihydrofolate reductase-thymidylate synthase
PF3D7_1211200	0.431767	-1.21168	0.00684738	21.5119	1	8	8	219.6	conserved Plasmodium protein, unknown function
PF3D7_0505800	0.415561	-1.26687	0.00742277	21.8938	1	8	8	11.1	small ubiquitin-related modifier
PF3D7_1149200	0.412533	-1.27742	0.022879	28.8971	1	8	10	126.9	ring-infected erythrocyte surface antigen
PF3D7_0106100	0.411253	-1.2819	0.170346	56.4727	1	8	9	45.3	V-type proton ATPase subunit C, putative
PF3D7_0520800	0.407016	-1.29684	8.03851e-05	8.64422	1	8	10	244.1	conserved Plasmodium protein, unknown function
PF3D7_0216400	0.400747	-1.31924	0.0304437	31.2748	1	8	8	86.3	vacuolar protein sorting-associated protein 45, putative
PF3D7_1433000	0.376871	-1.40786	0.000576691	12.6894	1	8	8	6.6	H/ACA ribonucleoprotein complex subunit 3, putative
PF3D7_0931800	0.327614	-1.60993	2.95107e-05	7.1473	1	8	8	32.6	proteasome subunit beta type-6, putative
PF3D7_1206700	0.312631	-1.67747	0.00208642	16.6537	1	8	8	64.5	eukaryotic translation initiation factor 5, putative
PF3D7_0210100	0.261169	-1.93695	0.000898709	13.8791	1	8	8	10.8	60S ribosomal protein L37ae, putative
PF3D7_0705700	0.227113	-2.13852	6.62835e-05	8.33422	1	8	9	6.4	40S ribosomal protein S29, putative
PF3D7_0312800	0.152534	-2.7128	0.000916804	13.9443	1	8	8	14.8	60S ribosomal protein L26, putative
PF3D7_1473700	0.001	-1000			2	8	8	142.2	nucleoporin NUP116/NSP116, putative
PF3D7_0307900	9.90136	3.30763	0.00211361	14.4955	1	7	7	448.2	conserved Plasmodium protein, unknown function
PF3D7_1020300	5.86729	2.5527	1.61199e-05	4.71149	1	7	7	89.2	cytoplasmic dynein intermediate chain, putative
PF3D7_0424300	5.15059	2.36474	0.00193444	14.1583	1	7	8	165.2	erythrocyte binding antigen-165, pseudogene
PF3D7_1026000	5.14396	2.36288	2.81989e-06	3.18529	1	7	8	43.2	conserved Plasmodium protein, unknown function
PF3D7_0926400	3.28203	1.71459	0.0126892	22.7252	1	7	8	60.7	monocarboxylate transporter, putative
PF3D7_0709100	3.27006	1.70932	0.00473057	17.5396	1	7	7	146.6	Cg1 protein
PF3D7_0415300	3.06805	1.61732	0.00176393	13.8176	1	7	8	159.6	cdc2-related protein kinase 3
PF3D7_1230400	2.77677	1.47341	0.00068092	10.9609	1	7	8	22.9	ATP-dependent protease subunit ClpQ
PF3D7_1032800	2.42163	1.27598	0.00190434	14.1026	1	7	8	36.5	leucine-rich repeat protein
PF3D7_1110200	2.38763	1.25558	0.0339044	30.1693	1	7	7	152.2	pre-mRNA-processing factor 6, putative
PF3D7_0908400	1.90043	0.926329	9.29901e-06	4.14988	1	7	10	24.1	conserved Plasmodium protein, unknown function
PF3D7_1105300	1.87881	0.90982	0.301487	76.0396	1	7	7	87	conserved Plasmodium protein, unknown function
PF3D7_1324800	1.49546	0.580591	0.233285	64.421	1	7	7	60.1	dihydrofolate synthase/folylpolyglutamate synthase
PF3D7_0513800	1.29548	0.373484	0.0015192	13.306	1	7	10	23.9	ras-related protein Rab-1A
PF3D7_1439600	1.22534	0.29318	0.368023	88.2385	1	7	8	22.6	conserved Plasmodium protein, unknown function
PF3D7_0511000	1.17165	0.228547	0.812162	327.872	1	7	9	20	translationally-controlled tumor protein homolog
PF3D7_1461400	1.17124	0.228036	0.549515	134.133	1	7	7	37	conserved Plasmodium protein, unknown function
PF3D7_1117100	1.14339	0.193322	0.654576	176.06	1	7	7	54.5	deubiquinating/deneddylating enzyme
PF3D7_0932300	1.12204	0.166126	0.729225	222.129	1	7	7	65.6	M18 aspartyl aminopeptidase
PF3D7_1006700	1.10801	0.147975	0.476377	112.265	1	7	7	45.6	conserved Plasmodium protein, unknown function
PF3D7_0515900	1.10594	0.14527	0.815998	334.853	1	7	7	39.8	NLI interacting factor-like phosphatase, putative
PF3D7_1037800	0.984618	-0.0223646	0.96328	1752.34	1	7	7	111.7	dynein intermediate chain, putative
PF3D7_0212400	0.911221	-0.134127	0.804772	312.126	2	7	7	494.2	conserved Plasmodium membrane protein, unknown function
PF3D7_0918300	0.898302	-0.154727	0.0839471	40.925	1	7	10	36.8	eukaryotic translation initiation factor 3 subunit F, putative
PF3D7_1459100	0.843986	-0.244709	0.0258438	27.6718	1	7	10	94.1	GTP-binding protein, putative
PF3D7_1122300	0.834995	-0.260161	0.195365	58.4048	1	7	7	42.6	conserved Plasmodium protein, unknown function
PF3D7_1319300	0.807362	-0.308713	0.107193	44.9165	1	7	8	94.8	tRNA (guanine(26)-N(2))-dimethyltransferase, putative
PF3D7_0404300	0.800557	-0.320924	0.719738	214.243	1	7	7	74.2	conserved Plasmodium protein, unknown function
PF3D7_0817500	0.742461	-0.429612	0.253741	67.6499	1	7	7	21.2	protein kinase c inhibitor-like protein, putative
PF3D7_0903100	0.735975	-0.442272	0.284426	73.0666	1	7	9	24.2	protein RER1, putative
PF3D7_0213100	0.662206	-0.594648	0.257374	68.3327	1	7	9	37.4	protein SIS1
PF3D7_1333400	0.550507	-0.861168	0.000564703	10.5001	1	7	10	28.1	conserved protein, unknown function
PF3D7_0320500	0.470971	-1.08629	0.0952666	42.8944	1	7	9	50.2	nicotinamidase, putative
PF3D7_0936800	0.444416	-1.17002	0.0298492	28.9501	1	7	9	45.5	Plasmodium exported protein (PHISTc), unknown function
PF3D7_0807200	0.340357	-1.55488	0.000708738	11.0671	1	7	7	48.9	conserved Plasmodium membrane protein, unknown function
PF3D7_0202400	0.001	-1000			2	7	7	141.8	translation-enhancing factor
PF3D7_1301700	0.001	-1000			2	7	7	28.3	CX3CL1-binding protein 2
PF3D7_0422500	9.30936	3.21868	0.000519076	7.63424	1	6	8	337.9	pre-mRNA-splicing helicase BRR2, putative
PF3D7_1469200	4.2665	2.09305	0.021597	23.261	1	6	6	42.3	shewanella-like protein phosphatase 1, putative
PF3D7_1248900	3.97417	1.99065	0.00794034	16.972	1	6	6	49.5	26S protease regulatory subunit 8, putative
PF3D7_1342600	2.9726	1.57172	0.00131495	9.99441	1	6	6	92.3	myosin A
PF3D7_0312300	2.204	1.14012	0.123749	44.8392	1	6	6	35.1	26S proteasome regulatory subunit RPN12, putative
PF3D7_0719400	2.14644	1.10195	0.00845118	17.3366	1	6	7	206	conserved Plasmodium protein, unknown function
PF3D7_0922800	2.11083	1.07781	0.0101962	18.3656	1	6	6	516.5	conserved Plasmodium protein, unknown function
PF3D7_1113100	1.95607	0.967957	0.0768419	36.6665	1	6	6	25.1	protein tyrosine phosphatase
PF3D7_1306400	1.89734	0.923978	0.000133215	5.23209	1	6	20	44.7	26S protease regulatory subunit 10B, putative
PF3D7_0825400	1.78814	0.838458	0.0952666	40.0835	1	6	6	14.2	conserved Apicomplexan protein, unknown function
PF3D7_0912900	1.49067	0.575956	0.120926	44.369	1	6	7	39.1	26S proteasome regulatory subunit RPN8, putative
PF3D7_1329100	1.39706	0.482395	0.272885	68.413	1	6	6	250.3	myosin F, putative
PF3D7_1463200	1.35175	0.434832	0.152071	49.1859	1	6	7	39.2	replication factor C subunit 3, putative
PF3D7_0317700	1.10057	0.138253	0.267566	67.4776	1	6	6	338.5	CPSF (cleavage and polyadenylation specific factor), subunit A, putative
PF3D7_1302000	1.0631	0.0882772	0.87119	469.13	1	6	6	36.5	EMP1-trafficking protein
PF3D7_0530200	0.941867	-0.086405	0.767785	254.046	1	6	6	59.8	phosphoenolpyruvate/phosphate translocator
PF3D7_0914400	0.902729	-0.147636	0.778528	265.644	1	6	6	28.4	conserved Plasmodium protein, unknown function
PF3D7_0909400	0.715716	-0.48254	0.382564	88.4744	1	6	6	155	exoribonuclease, putative
PF3D7_1118200	0.573741	-0.801528	0.00440072	14.1954	1	6	8	108.5	heat shock protein 90, putative
PF3D7_1226700	0.569128	-0.813174	0.00241132	11.9893	1	6	8	73.9	U3 small nucleolar RNA-interacting protein 2, putative
PF3D7_1334200	0.56283	-0.829229	0.0054943	15.1576	1	6	7	62.7	chaperone binding protein, putative
PF3D7_1011400	0.556791	-0.844793	0.12075	44.3153	1	6	6	30.6	proteasome subunit beta type-5
PF3D7_1305300	0.532083	-0.910276	0.0806099	37.4169	1	6	6	418.6	conserved Plasmodium protein, unknown function
PF3D7_1140100	0.494667	-1.01547	0.00532985	15.0159	1	6	7	14.6	V-type proton ATPase subunit F, putative
PF3D7_1124800	0.47378	-1.07771			1	6	6	29.8	ribosome biogenesis regulatory protein, putative
PF3D7_1340900	0.468583	-1.09362	0.0341985	27.2336	1	6	6	75.3	sodium-dependent phosphate transporter
PF3D7_1412800	0.457906	-1.12688	0.0305935	26.1839	1	6	6	48	glycylpeptide N-tetradecanoyltransferase
PF3D7_1466300	0.386003	-1.37332			1	6	6	132.8	26S proteasome regulatory subunit RPN2, putative
PF3D7_0905100	0.34066	-1.5536	0.00111608	9.49604	1	6	6	235.5	nucleoporin NUP100/NSP100, putative
PF3D7_1365700	0.203519	-2.29676	8.7493e-06	2.44562	1	6	7	47	SNARE associated Golgi protein, putative
PF3D7_1235300	0.001	-1000			2	6	6	194.7	CCR4-NOT transcription complex subunit 4, putative
PF3D7_1025500	1000	1000			1	5	5	695.9	conserved Plasmodium protein, unknown function
PF3D7_1126600	1000	1000			1	5	5	81.1	steryl ester hydrolase, putative
PF3D7_1431500	1000	1000			1	5	5	107.3	mitogen-activated protein kinase 1
PF3D7_1140700	11.4847	3.52165			1	5	6	268	conserved Plasmodium protein, unknown function
PF3D7_0611300	5.85676	2.5501	0.00605359	11.3248	1	5	7	33.5	conserved Apicomplexan protein, unknown function
PF3D7_1212900	5.74849	2.52318	0.304828	70.0328	1	5	5	125.5	bromodomain protein 2, putative
PF3D7_1129900	3.24265	1.69718			1	5	5	70.1	major facilitator superfamily-related transporter, putative
PF3D7_0513600	3.15404	1.6572			1	5	5	129.2	deoxyribodipyrimidine photo-lyase, putative
PF3D7_1446900	2.91531	1.54365	0.000253336	3.43658	1	5	7	44.7	glutaminyl-peptide cyclotransferase, putative
PF3D7_0413600	2.67786	1.42108	0.042818	24.7631	1	5	7	44.7	26S protease regulatory subunit 6B, putative
PF3D7_0904700	2.52258	1.3349			1	5	5	22.5	bacterial histone-like protein
PF3D7_1348600	2.49593	1.31957	0.00794034	12.5471	1	5	7	44.4	conserved Plasmodium protein, unknown function
PF3D7_1014700	1.92992	0.948542	0.295915	68.4818	1	5	5	34.8	prohibitin, putative
PF3D7_0411900	1.85774	0.893548	0.554069	129.141	1	5	5	225.4	DNA polymerase alpha catalytic subunit A
PF3D7_1236800	1.83669	0.877105			1	5	5	62.4	protein-S-isoprenylcysteine O-methyltransferase, putative
PF3D7_0607400	1.79607	0.84484			1	5	5	76.2	G-protein associated signal transduction protein, putative
PF3D7_1471200	1.58352	0.663138			1	5	5	75.5	inorganic anion exchanger, inorganic anion antiporter
PF3D7_0816600	1.31427	0.394257	0.224009	56.08	1	5	5	122.5	chaperone protein ClpB1
PF3D7_1450000	1.20158	0.264931	0.782152	265.734	1	5	7	43.8	serine/threonine protein kinase, putative
PF3D7_1016200	1.05434	0.0763351	0.852454	402.139	1	5	5	66.4	Rab3 GTPase-activating protein non-catalytic subunit, putative
PF3D7_1434600	0.708684	-0.496787			1	5	6	71.7	methionine aminopeptidase 2
PF3D7_0423300	0.647237	-0.627634	0.181315	49.3042	1	5	5	58.4	conserved Plasmodium protein, unknown function
PF3D7_0509400	0.560143	-0.836132			1	5	5	340.7	RNA polymerase I
PF3D7_1353800	0.416649	-1.26309	0.00317218	8.92719	1	5	7	27.9	proteasome subunit alpha type-4, putative
PF3D7_0831400	0.281071	-1.83099	0.0424839	24.6726	1	5	7	36.4	Plasmodium exported protein, unknown function
PF3D7_1023900	0.273805	-1.86878	1.46381e-05	1.20861	1	5	7	381.3	chromodomain-helicase-DNA-binding protein 1 homolog, putative
PF3D7_1243600	0.226231	-2.14413	0.0420256	24.5386	1	5	5	12.9	translation initiation factor SUI1, putative
PF3D7_0523400	0.001	-1000			1	5	5	61.9	DnaJ protein, putative
PF3D7_0618200	0.001	-1000			1	5	5	23.3	conserved Plasmodium protein, unknown function
PF3D7_0711500	0.001	-1000			1	5	5	78.9	regulator of chromosome condensation, putative
PF3D7_1102800	0.001	-1000			1	5	5	10.2	early transcribed membrane protein 11.2
PF3D7_1120000	0.001	-1000			1	5	5	129	conserved Plasmodium protein, unknown function
PF3D7_1128500	0.001	-1000			1	5	5	84.8	conserved protein, unknown function
PF3D7_1250100	14.6781	3.8756			1	4	6	377.4	osmiophilic body protein G377
PF3D7_1022700	2.88925	1.53069			1	4	4	33	phospholipid scramblase, putative
PF3D7_1448400	2.34158	1.22748	0.187271	42.0421	1	4	4	100.4	ubiquitin-protein ligase, putative
PF3D7_0424200	2.10296	1.07242			1	4	4	205.8	reticulocyte binding protein homologue 4
PF3D7_0710300	1.46777	0.553624			1	4	4	23.8	conserved Plasmodium membrane protein, unknown function
PF3D7_0308000	1.27153	0.346562			1	4	4	57.7	DNA polymerase delta small subunit, putative
PF3D7_0920700	1.2343	0.303694			1	4	4	70.6	CRAL/TRIO domain-containing protein, putative
PF3D7_1229100	1.17676	0.234821	0.77954	250.556	1	4	4	248.3	multidrug resistance-associated protein 2
PF3D7_1106200	1.02844	0.0404537			1	4	4	82	conserved Plasmodium protein, unknown function
PF3D7_0308600	0.88063	-0.183393			1	4	4	60.8	pre-mRNA-processing factor 19, putative
PF3D7_1312800	0.798484	-0.324665			1	4	4	277.7	conserved Plasmodium protein, unknown function
PF3D7_0610900	0.751144	-0.412839			1	4	4	149.4	transcription elongation factor SPT5, putative
PF3D7_1136500	0.576667	-0.794189			1	4	4	37.8	casein kinase 1
PF3D7_1316800	0.419182	-1.25435			1	4	4	34.5	protein transport protein SEC20, putative
PF3D7_1104800	0.343327	-1.54234			1	4	4	49.3	metabolite/drug transporter, putative
PF3D7_0202500	0.001	-1000			1	4	4	11.5	early transcribed membrane protein 2
PF3D7_0319900	0.001	-1000			1	4	4	36.1	conserved Plasmodium protein, unknown function
PF3D7_1033200	0.001	-1000			1	4	4	38.9	early transcribed membrane protein 10.2
PF3D7_1436000	0.001	-1000			1	4	4	67.4	glucose-6-phosphate isomerase
PF3D7_1025100	2.20044	1.13779			1	3	3	93.7	glutamine--fructose-6-phosphate aminotransferase [isomerizing], putative
PF3D7_1439900	1.65845	0.729837			1	3	3	27.9	triosephosphate isomerase
PF3D7_1346500	1.45111	0.537156			1	3	3	70.6	conserved Plasmodium protein, unknown function
PF3D7_0201900	0.758655	-0.398484			1	3	3	273.6	erythrocyte membrane protein 3
PF3D7_0513100	0.001	-1000			1	3	3	28.9	conserved Plasmodium protein, unknown function
PF3D7_0621900	0.001	-1000			1	3	3	92.5	signal recognition particle subunit SRP68, putative
PF3D7_0807500	0.001	-1000			1	3	3	29.5	proteasome subunit alpha type-6, putative
PF3D7_1028400	0.001	-1000			1	3	3	57.1	nucleolar preribosomal assembly protein, putative
PF3D7_1126500	0.001	-1000			1	3	3	163.5	conserved Plasmodium protein, unknown function
PF3D7_1239600	0.001	-1000			1	3	3	33.9	hydroxyethylthiazole kinase
PF3D7_1357900	0.001	-1000			1	3	3	28.4	pyrroline-5-carboxylate reductase, putative

## Sheet: S8 legend
Proteomics analysis of GFP-tagged DDX5 Pf3D7_1445900 and protein of unknown function Pf3D7_1423700 (control) immunoprecipitation-MS. Comparison of DDX5 to control. Label-free quantitative LC-MS/MS analysis of DDX5 and control. Ratio, log2(ratio), peptides used (Pept. used), total peptides, and protein molecular weight (MW) in kilodaltons (kDa) are provided for all proteins. Adjusted p-value and t…
