# Supplementary material for: Discovery of RUF6 ncRNA–interacting proteins involved in P. falciparum immune evasion
Source: Life Sci Alliance. 2022 Nov 15;6(1):e202201577. doi: 10.26508/lsa.202201577 (PMC9670795; doi:10.26508/lsa.202201577)
Supplement: Supplementary file 12 [file LSA-2022-01577_TableS10.xlsx]

## Sheet: S10 table
Table S10: Gene Ontology analysis (molecular function) of proteins significantly enriched in the DDX5 IP MS samples
ID	Name	Bgd count	Result count	Result gene list	Pct of bgd	Fold enrichment	Odds ratio	P-value	Benjamini	Bonferroni
GO:0003735	structural constituent of ribosome	163	34	PF3D7_0210100,PF3D7_0217800,PF3D7_0304400,PF3D7_0306900,PF3D7_0309600,PF3D7_0312800,PF3D7_0317600,PF3D7_0516200,PF3D7_0517000,PF3D7_0614500,PF3D7_0618300,PF3D7_0705700,PF3D7_0814000,PF3D7_0903900,PF3D7_1003500,PF3D7_1004000,PF3D7_1027800,PF3D7_1103100,PF3D7_1124900,PF3D7_1130100,PF3D7_1142600,PF3D7_1144000,PF3D7_1309100,PF3D7_1323400,PF3D7_1341200,PF3D7_1342000,PF3D7_1358800,PF3D7_1421200,PF3D7_1…	20.9	8.53	14.33	1.36367853175e-23	2.46825814246e-21	2.46825814246e-21
GO:0005198	structural molecule activity	209	35	PF3D7_0210100,PF3D7_0217800,PF3D7_0304400,PF3D7_0306900,PF3D7_0309600,PF3D7_0312800,PF3D7_0317600,PF3D7_0516200,PF3D7_0517000,PF3D7_0614500,PF3D7_0618300,PF3D7_0705700,PF3D7_0814000,PF3D7_0903900,PF3D7_1003500,PF3D7_1004000,PF3D7_1027800,PF3D7_1103100,PF3D7_1124900,PF3D7_1130100,PF3D7_1142600,PF3D7_1144000,PF3D7_1309100,PF3D7_1323400,PF3D7_1341200,PF3D7_1342000,PF3D7_1358800,PF3D7_1421200,PF3D7_1…	16.7	6.85	10.96	6.20446708058e-21	5.61504270793e-19	1.12300854159e-18
GO:0003723	RNA binding	628	40	PF3D7_0217800,PF3D7_0309600,PF3D7_0312800,PF3D7_0417200,PF3D7_0516200,PF3D7_0517000,PF3D7_0519700,PF3D7_0614500,PF3D7_0621900,PF3D7_0810600,PF3D7_0813300,PF3D7_0813400,PF3D7_0814000,PF3D7_0814200,PF3D7_1004000,PF3D7_1004400,PF3D7_1012400,PF3D7_1027800,PF3D7_1028400,PF3D7_1036900,PF3D7_1110400,PF3D7_1120000,PF3D7_1124900,PF3D7_1143400,PF3D7_1206200,PF3D7_1206700,PF3D7_1235300,PF3D7_1243600,PF3D7_1…	6.4	2.61	3.58	2.93220577364e-09	1.76909748343e-07	5.30729245029e-07
GO:0003674	molecular function	821	44	PF3D7_0210100,PF3D7_0217800,PF3D7_0304400,PF3D7_0306900,PF3D7_0309600,PF3D7_0312800,PF3D7_0317600,PF3D7_0505800,PF3D7_0516200,PF3D7_0517000,PF3D7_0614500,PF3D7_0618300,PF3D7_0705700,PF3D7_0810600,PF3D7_0814000,PF3D7_0903900,PF3D7_1003500,PF3D7_1004000,PF3D7_1023900,PF3D7_1027800,PF3D7_1103100,PF3D7_1120100,PF3D7_1124900,PF3D7_1130100,PF3D7_1140100,PF3D7_1142600,PF3D7_1144000,PF3D7_1206700,PF3D7_1…	5.4	2.19	3.0	7.73803393252e-08	3.50146035446e-06	1.40058414179e-05
GO:0003729	mRNA binding	119	13	PF3D7_0217800,PF3D7_0810600,PF3D7_0813400,PF3D7_0814200,PF3D7_1004000,PF3D7_1004400,PF3D7_1036900,PF3D7_1110400,PF3D7_1120000,PF3D7_1124900,PF3D7_1206200,PF3D7_1235300,PF3D7_1330800,	10.9	4.47	5.37	5.06247344446e-06	0.000183261538689	0.000916307693446
GO:0070003	threonine-type peptidase activity	15	4	PF3D7_0807500,PF3D7_0931800,PF3D7_1328100,PF3D7_1353800,	26.7	10.91	14.98	0.000376193278881	0.00972728335391	0.0680909834774
GO:0004298	threonine-type endopeptidase activity	15	4	PF3D7_0807500,PF3D7_0931800,PF3D7_1328100,PF3D7_1353800,	26.7	10.91	14.98	0.000376193278881	0.00972728335391	0.0680909834774
GO:0008301	DNA binding, bending	2	2	PF3D7_0817900,PF3D7_1202900,	100.0	40.91	inf	0.000592675606636	0.0134092856001	0.107274284801
GO:0019843	rRNA binding	38	5	PF3D7_0517000,PF3D7_1028400,PF3D7_1323400,PF3D7_1358800,PF3D7_1424100,	13.2	5.38	6.27	0.00211227411317	0.0424801793872	0.382321614485
GO:0016646	oxidoreductase activity, acting on the CH-NH group of donors, NAD or NADP as acceptor	4	2	PF3D7_0417200,PF3D7_1357900,	50.0	20.45	40.57	0.00344306881317	0.0623195455184	0.623195455184
GO:0016645	oxidoreductase activity, acting on the CH-NH group of donors	6	2	PF3D7_0417200,PF3D7_1357900,	33.3	13.64	20.28	0.00833521169268	0.122905824887	1.0
GO:0031369	translation initiation factor binding	9	2	PF3D7_1206200,PF3D7_1206700,	22.2	9.09	11.58	0.0190667024097	0.122905824887	1.0
GO:0000900	translation repressor activity, mRNA regulatory element binding	1	1	PF3D7_0814200,	100.0	40.91	inf	0.0244453574362	0.122905824887	1.0
GO:0016872	intramolecular lyase activity	1	1	PF3D7_0511800,	100.0	40.91	inf	0.0244453574362	0.122905824887	1.0
GO:0019237	centromeric DNA binding	1	1	PF3D7_1202900,	100.0	40.91	inf	0.0244453574362	0.122905824887	1.0
GO:0030371	translation repressor activity	1	1	PF3D7_0814200,	100.0	40.91	inf	0.0244453574362	0.122905824887	1.0
GO:0036524	protein deglycase activity	1	1	PF3D7_0627500,	100.0	40.91	inf	0.0244453574362	0.122905824887	1.0
GO:0030546	signaling receptor activator activity	1	1	PF3D7_1229400,	100.0	40.91	inf	0.0244453574362	0.122905824887	1.0
GO:0042083	5,10-methylenetetrahydrofolate-dependent methyltransferase activity	1	1	PF3D7_0417200,	100.0	40.91	inf	0.0244453574362	0.122905824887	1.0
GO:0048018	receptor ligand activity	1	1	PF3D7_1229400,	100.0	40.91	inf	0.0244453574362	0.122905824887	1.0
GO:0050178	phenylpyruvate tautomerase activity	1	1	PF3D7_1229400,	100.0	40.91	inf	0.0244453574362	0.122905824887	1.0
GO:0052657	guanine phosphoribosyltransferase activity	1	1	PF3D7_1012400,	100.0	40.91	inf	0.0244453574362	0.122905824887	1.0
GO:0071074	eukaryotic initiation factor eIF2 binding	1	1	PF3D7_1206700,	100.0	40.91	inf	0.0244453574362	0.122905824887	1.0
GO:0030545	signaling receptor regulator activity	1	1	PF3D7_1229400,	100.0	40.91	inf	0.0244453574362	0.122905824887	1.0
GO:0016862	intramolecular oxidoreductase activity, interconverting keto- and enol-groups	1	1	PF3D7_1229400,	100.0	40.91	inf	0.0244453574362	0.122905824887	1.0
GO:0106130	purine phosphoribosyltransferase activity	1	1	PF3D7_1012400,	100.0	40.91	inf	0.0244453574362	0.122905824887	1.0
GO:0005125	cytokine activity	1	1	PF3D7_1229400,	100.0	40.91	inf	0.0244453574362	0.122905824887	1.0
GO:0004088	carbamoyl-phosphate synthase (glutamine-hydrolyzing) activity	1	1	PF3D7_1308200,	100.0	40.91	inf	0.0244453574362	0.122905824887	1.0
GO:0004146	dihydrofolate reductase activity	1	1	PF3D7_0417200,	100.0	40.91	inf	0.0244453574362	0.122905824887	1.0
GO:0004332	fructose-bisphosphate aldolase activity	1	1	PF3D7_1444800,	100.0	40.91	inf	0.0244453574362	0.122905824887	1.0
GO:0004347	glucose-6-phosphate isomerase activity	1	1	PF3D7_1436000,	100.0	40.91	inf	0.0244453574362	0.122905824887	1.0
GO:0004417	hydroxyethylthiazole kinase activity	1	1	PF3D7_1239600,	100.0	40.91	inf	0.0244453574362	0.122905824887	1.0
GO:0004422	hypoxanthine phosphoribosyltransferase activity	1	1	PF3D7_1012400,	100.0	40.91	inf	0.0244453574362	0.122905824887	1.0
GO:0004799	thymidylate synthase activity	1	1	PF3D7_0417200,	100.0	40.91	inf	0.0244453574362	0.122905824887	1.0
GO:0004735	pyrroline-5-carboxylate reductase activity	1	1	PF3D7_1357900,	100.0	40.91	inf	0.0244453574362	0.122905824887	1.0
GO:0004512	inositol-3-phosphate synthase activity	1	1	PF3D7_0511800,	100.0	40.91	inf	0.0244453574362	0.122905824887	1.0
GO:0090079	translation regulator activity, nucleic acid binding	96	6	PF3D7_0814200,PF3D7_1143400,PF3D7_1206200,PF3D7_1206700,PF3D7_1243600,PF3D7_1451100,	6.3	2.56	2.75	0.0292643024044	0.143157803654	1.0
GO:0043021	ribonucleoprotein complex binding	49	4	PF3D7_0202400,PF3D7_0621900,PF3D7_1103100,PF3D7_1451100,	8.2	3.34	3.64	0.0308905753967	0.147136688074	1.0
GO:0070034	telomerase RNA binding	2	1	PF3D7_1433000,	50.0	20.45	40.24	0.0482980392661	0.178407043003	1.0
GO:0004619	phosphoglycerate mutase activity	2	1	PF3D7_1120100,	50.0	20.45	40.24	0.0482980392661	0.178407043003	1.0
GO:0030295	protein kinase activator activity	2	1	PF3D7_1103100,	50.0	20.45	40.24	0.0482980392661	0.178407043003	1.0
GO:0019956	chemokine binding	2	1	PF3D7_1301700,	50.0	20.45	40.24	0.0482980392661	0.178407043003	1.0
GO:0019955	cytokine binding	2	1	PF3D7_1301700,	50.0	20.45	40.24	0.0482980392661	0.178407043003	1.0
GO:0005047	signal recognition particle binding	2	1	PF3D7_0621900,	50.0	20.45	40.24	0.0482980392661	0.178407043003	1.0
GO:0005102	signaling receptor binding	2	1	PF3D7_1229400,	50.0	20.45	40.24	0.0482980392661	0.178407043003	1.0
GO:0019209	kinase activator activity	2	1	PF3D7_1103100,	50.0	20.45	40.24	0.0482980392661	0.178407043003	1.0
GO:0017056	structural constituent of nuclear pore	2	1	PF3D7_1473700,	50.0	20.45	40.24	0.0482980392661	0.178407043003	1.0
GO:0004816	asparagine-tRNA ligase activity	2	1	PF3D7_0211800,	50.0	20.45	40.24	0.0482980392661	0.178407043003	1.0
GO:0016832	aldehyde-lyase activity	2	1	PF3D7_1444800,	50.0	20.45	40.24	0.0482980392661	0.178407043003	1.0

## Sheet: S10 legend
Gene Ontology analysis of proteins that were significantly enriched in the DDX5 IP MS samples when compared to control sample (Table EV7). Number of genes annotated with each “molecular function” term in the P. falciparum genome (Bgd count), number of significantly enriched proteins with this term (Result count), p-value (calculated using a Fisher’s exact test), and Benjamini corrected p-value (F…
