# Supplementary material for: Discovery of RUF6 ncRNA–interacting proteins involved in P. falciparum immune evasion
Source: Life Sci Alliance. 2022 Nov 15;6(1):e202201577. doi: 10.26508/lsa.202201577 (PMC9670795; doi:10.26508/lsa.202201577)
Supplement: Supplementary file 16 [file LSA-2022-01577_TableS14.xlsx]

## Sheet: S14 table
Table S14: Differential gene expression analysis at 12 hpi of rapamycin-treated over untreated DDX5-GFP-FKBP parasites (genes showing significant change)
ID	baseMean	log2FoldChange	lfcSE	pvalue	padj
PF3D7_0113000	1763.24	-0.9574	0.118203	3.07851e-17	5.53669e-14
PF3D7_1035800	685.035	-0.825249	0.0980979	2.41362e-18	8.68178e-15
PF3D7_1372300	273.406	-0.663133	0.148157	4.61508e-07	3.38844e-05
PF3D7_0201900	3037.66	-0.637355	0.120543	8.23966e-09	1.53411e-06
PF3D7_0935900	10349.5	-0.622588	0.10739	5.63641e-10	1.84311e-07
PF3D7_0517200	409.46	-0.600661	0.12524	1.08952e-07	1.22469e-05
PF3D7_1120000	1047.75	-0.599074	0.100192	1.61521e-10	6.45547e-08
PF3D7_0831700	18039	-0.589508	0.0923103	1.16455e-11	8.37777e-09
PF3D7_0404300	773.866	-0.587209	0.126791	2.52237e-07	2.3264e-05
PF3D7_0723400	757.568	-0.57553	0.120584	1.25968e-07	1.33955e-05
PF3D7_0403200	460.871	-0.542127	0.142131	9.55688e-06	0.000324303
PF3D7_0936800	4052.27	-0.538792	0.09417	8.27523e-10	2.4805e-07
PF3D7_1212700	4492.24	-0.528106	0.113611	2.59306e-07	2.33181e-05
PF3D7_1476200	334.279	-0.52201	0.121092	1.24314e-06	7.84485e-05
PF3D7_1323000	164.162	-0.509145	0.162577	0.000120843	0.00191485
PF3D7_0412400	49783.8	-0.484462	0.0912925	1.74729e-08	2.58573e-06
PF3D7_0406500	1419.79	-0.483395	0.123187	7.03183e-06	0.000264505
PF3D7_0710700	393.102	-0.479981	0.136772	3.48931e-05	0.000831196
PF3D7_1133700	3721.32	-0.47677	0.0874146	4.46299e-09	1.07023e-06
PF3D7_0516300	389.495	-0.471989	0.118526	5.81576e-06	0.000229882
PF3D7_1229100	4446.24	-0.468201	0.0761094	6.95655e-11	3.57467e-08
PF3D7_0501300	12754.3	-0.466563	0.109625	2.41334e-06	0.000125808
PF3D7_0936000	5364.33	-0.462476	0.101643	4.83177e-07	3.47598e-05
PF3D7_0607000	2126.56	-0.461501	0.100191	3.69647e-07	3.09214e-05
PF3D7_1353100	5230.3	-0.455794	0.0897089	3.33317e-08	4.0086e-06
PF3D7_1353200	4057.77	-0.447414	0.0962472	3.16379e-07	2.77565e-05
PF3D7_0532300	4672.18	-0.446371	0.0825287	6.24467e-09	1.3213e-06
PF3D7_0936300	5631.6	-0.443758	0.10179	1.222e-06	7.84485e-05
PF3D7_0204300	207.683	-0.443701	0.141169	0.000138466	0.00206184
PF3D7_0806600	205.748	-0.442086	0.143324	0.000167722	0.00235563
PF3D7_1420000	1869.71	-0.437535	0.108548	5.20435e-06	0.000218377
PF3D7_1017600	979.352	-0.436383	0.108809	5.64337e-06	0.000228081
PF3D7_0308900	1083.74	-0.432999	0.102309	2.2264e-06	0.00011777
PF3D7_0902300	961.122	-0.432774	0.0989701	1.19584e-06	7.82077e-05
PF3D7_0921900	748.053	-0.432366	0.110815	8.89408e-06	0.000307615
PF3D7_1301700	4693.09	-0.429698	0.104889	4.02395e-06	0.00019045
PF3D7_0418100	342.552	-0.428764	0.116046	2.06875e-05	0.000557759
PF3D7_0913300	540.981	-0.428545	0.102389	2.77405e-06	0.000142546
PF3D7_1372200	5439.22	-0.427592	0.105901	5.22112e-06	0.000218377
PF3D7_0921800	290.332	-0.427047	0.132983	0.000116873	0.00187675
PF3D7_0109700	228.607	-0.424207	0.148166	0.000351824	0.00387006
PF3D7_0217700	211.727	-0.423604	0.139185	0.000204724	0.00269741
PF3D7_1421400	257.134	-0.423409	0.138695	0.000197526	0.00262177
PF3D7_0302100	647.985	-0.423093	0.103399	4.14503e-06	0.000190958
PF3D7_0411000	2436.92	-0.42232	0.0995043	2.18857e-06	0.00011777
PF3D7_1346300	1917.76	-0.420388	0.125298	7.2336e-05	0.00138657
PF3D7_1148700	1547.01	-0.414456	0.0891329	3.4981e-07	2.99587e-05
PF3D7_1342700	170.787	-0.411143	0.164029	0.000991644	0.0081437
PF3D7_1450700	579.21	-0.409323	0.100585	4.86891e-06	0.000208494
PF3D7_0601900	1692.85	-0.408279	0.105366	1.08448e-05	0.000363374
PF3D7_0702500	4543.74	-0.408109	0.0917768	9.26376e-07	6.383e-05
PF3D7_1340300	573.08	-0.404863	0.112208	3.08391e-05	0.000754613
PF3D7_1028300	428.177	-0.40252	0.110013	2.59761e-05	0.000672201
PF3D7_1123900	966.285	-0.401039	0.103712	1.1301e-05	0.000370439
PF3D7_1251500	599.845	-0.400962	0.102445	9.54847e-06	0.000324303
PF3D7_1236100	2476.41	-0.40002	0.0891054	7.77427e-07	5.48315e-05
PF3D7_1224600	106.127	-0.398046	0.1953	0.0030742	0.0178964
PF3D7_1016300	6698.13	-0.397506	0.104091	1.33699e-05	0.000414583
PF3D7_1039000	758.872	-0.397036	0.106732	2.07301e-05	0.000557759
PF3D7_1240400	537.04	-0.396837	0.116442	6.55716e-05	0.00130374
PF3D7_1446200	2438.74	-0.396141	0.0990326	6.80197e-06	0.000260284
PF3D7_1407100	1147.34	-0.39238	0.12963	0.000237995	0.00301433
PF3D7_1445200	692.396	-0.391506	0.0993948	8.88176e-06	0.000307615
PF3D7_0106400	440.371	-0.391071	0.130011	0.000257105	0.00312553
PF3D7_1301400	2438.27	-0.390552	0.0911184	2.03763e-06	0.000114521
PF3D7_0306700	174.464	-0.389876	0.168495	0.00180424	0.0123147
PF3D7_0716200	3210.43	-0.387797	0.0810228	1.97629e-07	1.97464e-05
PF3D7_1424400	4973.12	-0.387334	0.0952565	5.30178e-06	0.000219201
PF3D7_1240600	292.215	-0.386869	0.131424	0.000319313	0.00358928
PF3D7_0831900	280.641	-0.386391	0.128287	0.000262507	0.00316858
PF3D7_0311100	260.886	-0.385545	0.129039	0.000284239	0.00330877
PF3D7_1364800	771.033	-0.384542	0.101795	1.72615e-05	0.000493073
PF3D7_0825500	535.669	-0.382567	0.104117	2.64041e-05	0.000678398
PF3D7_1425900	801.762	-0.382164	0.10477	2.88831e-05	0.000726522
PF3D7_1024800	10112.5	-0.380929	0.0870629	1.41808e-06	8.76267e-05
PF3D7_1010200	701.462	-0.379206	0.112369	7.96954e-05	0.00145515
PF3D7_0610200	412.622	-0.376866	0.114239	0.000106257	0.00172944
PF3D7_1022400	2252.79	-0.375674	0.0904211	3.84758e-06	0.000187024
PF3D7_1405800	1089.74	-0.375604	0.0981852	1.50207e-05	0.000442864
PF3D7_1037300	1123.07	-0.369747	0.0986262	2.07783e-05	0.000557759
PF3D7_0723600	138.321	-0.369711	0.169776	0.00263471	0.0160356
PF3D7_0831800	1102.44	-0.369434	0.118116	0.000189594	0.0025542
PF3D7_0201800	2335.77	-0.369337	0.088939	3.97591e-06	0.00019045
PF3D7_1110400	3450.3	-0.369026	0.0842136	1.44862e-06	8.76267e-05
PF3D7_0424900	103.817	-0.365398	0.192758	0.00476744	0.0249978
PF3D7_0424700	2172.37	-0.364782	0.0953275	1.58551e-05	0.000463665
PF3D7_0813400	3637.67	-0.364444	0.0908168	7.32041e-06	0.000268689
PF3D7_1033400	1541.73	-0.364277	0.0966655	1.9715e-05	0.000551557
PF3D7_1308200	3119.62	-0.364258	0.0943876	1.36339e-05	0.0004178
PF3D7_1228400	354.425	-0.363488	0.127642	0.00047583	0.00479429
PF3D7_1337500	907.026	-0.363483	0.10805	8.82844e-05	0.00154155
PF3D7_0812500	1081.59	-0.361952	0.0969193	2.25072e-05	0.000595283
PF3D7_1461600	825.579	-0.361387	0.095503	1.86173e-05	0.000527293
PF3D7_1022100	264.734	-0.361181	0.141835	0.00110681	0.00878666
PF3D7_0517000	2409.31	-0.360527	0.10472	6.81314e-05	0.00131757
PF3D7_0724100	523.655	-0.359773	0.121192	0.000337363	0.00375695
PF3D7_1354300	983.261	-0.359519	0.0931125	1.42102e-05	0.000427772
PF3D7_0520600	684.676	-0.358497	0.111078	0.000145361	0.00213413
PF3D7_0915400	5164.24	-0.358192	0.0893858	7.59266e-06	0.000273108
PF3D7_0202400	597.668	-0.357159	0.129757	0.000642279	0.00590864
PF3D7_0827000	725.619	-0.356901	0.106878	9.83535e-05	0.00164029
PF3D7_1370300	13645.9	-0.356805	0.0989222	3.85003e-05	0.000899011
PF3D7_0719600	2826.81	-0.356539	0.100463	4.71935e-05	0.00102262
PF3D7_1332500	568.506	-0.35594	0.105321	8.75172e-05	0.00153561
PF3D7_0707900	649.035	-0.355286	0.101896	5.92698e-05	0.00121825
PF3D7_0503300	774.772	-0.353208	0.107738	0.000125002	0.00193282
PF3D7_0506800	698.047	-0.352368	0.0954309	2.80155e-05	0.000709661
PF3D7_1001500	10842	-0.350509	0.102839	8.1442e-05	0.00147953
PF3D7_0936600	1854.62	-0.34873	0.0892252	1.21627e-05	0.000383767
PF3D7_1247900	273.521	-0.348553	0.136556	0.00117117	0.0091787
PF3D7_0415900	4766.13	-0.348392	0.103927	9.84994e-05	0.00164029
PF3D7_1408200	1031.48	-0.348289	0.108757	0.000163853	0.00232956
PF3D7_0903900	2109.06	-0.347631	0.0953675	3.46977e-05	0.000831196
PF3D7_0501400	2773.77	-0.345599	0.2324	0.0096831	0.042424
PF3D7_1206600	1182.17	-0.345454	0.0880071	1.15544e-05	0.000371083
PF3D7_0713900	1457.36	-0.344827	0.0928144	2.66799e-05	0.000680621
PF3D7_1230800	660.864	-0.344622	0.0938935	3.10818e-05	0.000755414
PF3D7_1451100	12306.6	-0.34408	0.0886445	1.3706e-05	0.0004178
PF3D7_1465400	311.751	-0.343765	0.130177	0.00094703	0.00783096
PF3D7_1309000	629.171	-0.343039	0.104735	0.000133196	0.00201305
PF3D7_1426100	1065.98	-0.341388	0.097866	6.33946e-05	0.00128107
PF3D7_0922100	1829.83	-0.341288	0.103479	0.000124582	0.00193282
PF3D7_1130200	8201.06	-0.340125	0.0967658	5.79961e-05	0.00119892
PF3D7_0528600	306.647	-0.33997	0.13309	0.00121989	0.00944631
PF3D7_1136600	808.514	-0.339518	0.0948739	4.61857e-05	0.00100685
PF3D7_1411900	746.571	-0.339388	0.0920368	3.06775e-05	0.000754613
PF3D7_0702400	3903.74	-0.33864	0.0993938	8.54567e-05	0.00153561
PF3D7_0612900	1347.36	-0.337428	0.0880026	1.7272e-05	0.000493073
PF3D7_1224300	8887.62	-0.337286	0.0902769	2.52402e-05	0.000662694
PF3D7_0519800	1234.6	-0.33712	0.0929884	3.89523e-05	0.000899011
PF3D7_1412900	514.672	-0.337015	0.109717	0.000269045	0.00321713
PF3D7_0814200	4834.29	-0.336887	0.0996587	9.55917e-05	0.00162959
PF3D7_1216900	1673.58	-0.336815	0.0858932	1.19872e-05	0.000381574
PF3D7_1116300	249.591	-0.336358	0.133792	0.00137724	0.0103207
PF3D7_1344200	1850.34	-0.335862	0.0795644	3.41727e-06	0.000170721
PF3D7_0201600	580.268	-0.33581	0.0989469	9.21599e-05	0.00159375
PF3D7_1116200	490.48	-0.335727	0.112603	0.000360821	0.00389752
PF3D7_0708800	2889.4	-0.335612	0.0763862	1.61578e-06	9.45332e-05
PF3D7_1238300	889.948	-0.334804	0.0967676	7.32413e-05	0.00138657
PF3D7_0816000	644.088	-0.333823	0.101246	0.000129511	0.00196561
PF3D7_1402700	502.44	-0.332417	0.135822	0.00168022	0.0118042
PF3D7_1459000	1315.82	-0.331624	0.106802	0.000249819	0.00307321
PF3D7_1331700	2545.76	-0.331431	0.0822777	8.07714e-06	0.000287658
PF3D7_0319600	1423.6	-0.330925	0.106294	0.000243515	0.0030414
PF3D7_1225600	289.009	-0.330566	0.130421	0.00134485	0.0101858
PF3D7_1126500	450.287	-0.330504	0.105647	0.000234503	0.00299116
PF3D7_0726100	1048.93	-0.329781	0.0902385	3.62059e-05	0.000856793
PF3D7_1421200	1860.02	-0.329365	0.0940409	6.40859e-05	0.0012878
PF3D7_0214400	575.277	-0.328446	0.106481	0.000271333	0.00322352
PF3D7_0617200	2320.8	-0.327889	0.0783035	4.13902e-06	0.000190958
PF3D7_1333600	430.417	-0.327081	0.113869	0.000537535	0.00520222
PF3D7_0903500	622.416	-0.326968	0.116667	0.000651318	0.00597651
PF3D7_1230900	975.291	-0.326827	0.0945403	7.66328e-05	0.00143567
PF3D7_1037700	362.659	-0.326705	0.137082	0.00200889	0.0132102
PF3D7_0621800	2274.76	-0.326338	0.0954001	8.7286e-05	0.00153561
PF3D7_1229500	1496.93	-0.325359	0.090858	4.88375e-05	0.00103906
PF3D7_1420400	1102.06	-0.325337	0.0877556	3.03466e-05	0.000754613
PF3D7_1124800	995.364	-0.325181	0.101427	0.000181471	0.00248195
PF3D7_1358100	678.207	-0.324593	0.102318	0.000205633	0.00269949
PF3D7_1327200	115.073	-0.324324	0.189931	0.00826225	0.037844
PF3D7_1250000	425.095	-0.324247	0.121858	0.000983472	0.00809508
PF3D7_1013100	570.568	-0.323684	0.102544	0.000221576	0.00286693
PF3D7_1349400	149.621	-0.322564	0.164082	0.00524996	0.0268086
PF3D7_1357100	4804.51	-0.322075	0.105499	0.00031003	0.00350685
PF3D7_1302000	1200.94	-0.322074	0.0915467	6.32709e-05	0.00128107
PF3D7_0409400	462.22	-0.322052	0.107268	0.000366815	0.0039504
PF3D7_0826700	5470.68	-0.321353	0.094635	9.75444e-05	0.00164029
PF3D7_1007600	197.726	-0.321337	0.144389	0.00303983	0.0177793
PF3D7_0304400	2092.4	-0.321128	0.100161	0.000189195	0.0025542
PF3D7_1123400	1674.51	-0.320519	0.0854384	2.56189e-05	0.000667761
PF3D7_1450100	2517.01	-0.320182	0.0930749	8.66325e-05	0.00153561
PF3D7_0420000	1069.73	-0.320137	0.11723	0.000824683	0.00713921
PF3D7_1314900	360.53	-0.319475	0.123515	0.00122117	0.00944631
PF3D7_1443300	330.606	-0.318933	0.135909	0.00230155	0.0146785
PF3D7_1126900	425.276	-0.318464	0.107482	0.000425676	0.00440798
PF3D7_1001400	2927.32	-0.318181	0.0763487	4.80095e-06	0.000208494
PF3D7_1447200	454.312	-0.317635	0.117201	0.000902937	0.00752833
PF3D7_1406200	1402.3	-0.317603	0.106479	0.000398715	0.0042106
PF3D7_0810600	1790.49	-0.317508	0.0854615	3.04773e-05	0.000754613
PF3D7_0819000	693.605	-0.317412	0.0977276	0.000168961	0.00235563
PF3D7_0202000	10627.9	-0.317266	0.0985825	0.00016265	0.00232163
PF3D7_1235300	1478.63	-0.31697	0.109841	0.000537081	0.00520222
PF3D7_0621200	1900.46	-0.316525	0.0977418	0.00017386	0.00239607
PF3D7_0622800	1922.27	-0.316476	0.0866173	3.90623e-05	0.000899011
PF3D7_1465900	3781.2	-0.316404	0.0921967	8.74657e-05	0.00153561
PF3D7_1026800	6460.02	-0.316371	0.0949028	0.00012559	0.00193282
PF3D7_1445900	1794.85	-0.316327	0.0883715	5.17142e-05	0.00108149
PF3D7_0709600	274.293	-0.316215	0.124743	0.0014697	0.0107259
PF3D7_0532400	903.659	-0.316008	0.0898287	6.67099e-05	0.00131123
PF3D7_0920800	1483.38	-0.31587	0.0908797	7.5846e-05	0.00142837
PF3D7_0909300	537.576	-0.315716	0.105216	0.000381105	0.00406775
PF3D7_1308900	1855.88	-0.3155	0.0867698	4.19197e-05	0.000942407
PF3D7_1015300	313.124	-0.315375	0.118267	0.00103238	0.00838258
PF3D7_0102600	343.996	-0.31499	0.118823	0.00107425	0.00862514
PF3D7_0830700	234.789	-0.314736	0.144885	0.00354615	0.0198067
PF3D7_0623100	1534.41	-0.314653	0.0853495	3.48115e-05	0.000831196
PF3D7_0501000	2283.36	-0.314337	0.0822109	2.0509e-05	0.000557759
PF3D7_1365100	83.8249	-0.314206	0.241127	0.0145853	0.0567525
PF3D7_1464200	95.6238	-0.314028	0.204482	0.011321	0.0476277
PF3D7_0801000	3013.67	-0.313574	0.0972031	0.000184928	0.00251013
PF3D7_1410200	1065.47	-0.312697	0.0903461	7.76048e-05	0.00143621
PF3D7_0516200	3981.91	-0.31209	0.101653	0.000311184	0.00350886
PF3D7_1460700	3212.91	-0.311744	0.105189	0.000436894	0.00449002
PF3D7_0509400	2158.16	-0.311672	0.0991125	0.000245455	0.00305502
PF3D7_0417300	346.15	-0.310859	0.11956	0.00127254	0.009739
PF3D7_1148900	1450.75	-0.310469	0.0977239	0.000221311	0.00286693
PF3D7_1017400	735.907	-0.30997	0.0993955	0.000269212	0.00321713
PF3D7_1110200	1264.45	-0.309831	0.0878909	6.56038e-05	0.00130374
PF3D7_0208700	285.15	-0.309788	0.126635	0.00191004	0.01284
PF3D7_0716800	1563.25	-0.309624	0.0937174	0.000137919	0.00206184
PF3D7_1408100	3185.85	-0.309133	0.0849515	4.24757e-05	0.000943118
PF3D7_1429500	159.281	-0.309046	0.166154	0.00695553	0.0331818
PF3D7_0936400	398.456	-0.307988	0.123311	0.00168549	0.0118181
PF3D7_1357700	615.877	-0.307847	0.102746	0.00040637	0.00426155
PF3D7_1333400	815.023	-0.307802	0.105133	0.000496723	0.00494606
PF3D7_0314400	374.778	-0.307647	0.124012	0.00177698	0.0122919
PF3D7_0317600	3588.71	-0.307628	0.0987743	0.000274421	0.00323637
PF3D7_0904000	1131.28	-0.307512	0.0865026	5.96132e-05	0.00121834
PF3D7_1139300	1608.5	-0.307509	0.0918529	0.000126278	0.00193282
PF3D7_0922500	5910.11	-0.306444	0.0941035	0.000172588	0.00238768
PF3D7_1010700	900.003	-0.306436	0.0973542	0.000250333	0.00307321
PF3D7_0721600	4069.94	-0.306413	0.102091	0.000400657	0.00421393
PF3D7_1470200	141.863	-0.30605	0.171268	0.00813426	0.0374101
PF3D7_1341200	3644.86	-0.305597	0.0891445	9.50685e-05	0.00162839
PF3D7_1302800	2157.74	-0.305594	0.09238	0.000146235	0.00213824
PF3D7_1302700	586.078	-0.305432	0.105304	0.000552918	0.00528949
PF3D7_0526800	661.883	-0.304786	0.0945154	0.000194445	0.00260977
PF3D7_1005600	445.729	-0.304602	0.113994	0.00109299	0.00873659
PF3D7_0610800	2831.45	-0.304321	0.087616	8.19e-05	0.00148037
PF3D7_1028000	371.028	-0.304255	0.117167	0.00132946	0.0101315
PF3D7_1311800	5769.3	-0.304211	0.0778754	1.48646e-05	0.000441884
PF3D7_0606100	863.24	-0.303929	0.0917254	0.000147098	0.00214215
PF3D7_0602100	444.189	-0.303591	0.106907	0.000675576	0.00612103
PF3D7_0903400	1712.54	-0.303263	0.0903374	0.00012467	0.00193282
PF3D7_0813900	3382.84	-0.303183	0.104265	0.000546172	0.00526698
PF3D7_0422500	1507.56	-0.301567	0.0904031	0.000135566	0.00204029
PF3D7_1227800	860.871	-0.300692	0.0912459	0.000160145	0.00229498
PF3D7_1120100	4390.21	-0.300688	0.0944787	0.000231844	0.00296777
PF3D7_1118500	1016.48	-0.299444	0.0863483	8.64387e-05	0.00153561
PF3D7_1326400	636.931	-0.299391	0.103965	0.000610388	0.00570719
PF3D7_0823100	356.018	-0.298859	0.122343	0.00201457	0.0132234
PF3D7_0826100	3561.71	-0.298685	0.0979887	0.00035932	0.00389752
PF3D7_0731100	7209.87	-0.29858	0.0747524	1.09103e-05	0.000363374
PF3D7_1134700	947.551	-0.298	0.0913169	0.000178737	0.00245388
PF3D7_1147800	93.9472	-0.297607	0.203156	0.0137383	0.0544838
PF3D7_0706400	1525.57	-0.2971	0.0936888	0.000249904	0.00307321
PF3D7_1476000	141.943	-0.296998	0.165262	0.00845203	0.0384348
PF3D7_1206200	1958.72	-0.296045	0.0900304	0.000164989	0.00233647
PF3D7_0727200	431.142	-0.295669	0.11409	0.0014381	0.0106437
PF3D7_1015900	10428.6	-0.295197	0.0982975	0.000420951	0.00437619
PF3D7_0505000	379.735	-0.295113	0.117842	0.00180212	0.0123147
PF3D7_1423700	1874.71	-0.294994	0.0883529	0.00014045	0.00207048
PF3D7_1353400	298.658	-0.294758	0.123036	0.00239877	0.0150582
PF3D7_1424100	6940.81	-0.294403	0.0867993	0.000119845	0.00191139
PF3D7_0412700	176.375	-0.29423	0.173471	0.0101334	0.0438101
PF3D7_1342400	689.074	-0.293926	0.126401	0.00284846	0.0169354
PF3D7_1125400	293.88	-0.293662	0.130259	0.00337105	0.0191862
PF3D7_0407000	100.201	-0.293217	0.201846	0.0145977	0.0567525
PF3D7_0618200	617.199	-0.292949	0.100128	0.000552525	0.00528949
PF3D7_1445100	1503.41	-0.292415	0.0842546	8.87831e-05	0.00154277
PF3D7_1109900	2427.44	-0.292155	0.0828712	7.30694e-05	0.00138657
PF3D7_1213800	1329.15	-0.291551	0.0846464	9.84424e-05	0.00164029
PF3D7_0511500	5013.6	-0.291355	0.101827	0.000661729	0.00604122
PF3D7_0821700	1915.47	-0.290945	0.105697	0.000934777	0.00774745
PF3D7_0629900	800.913	-0.29077	0.0927756	0.000288755	0.00332901
PF3D7_1451200	3720.73	-0.290726	0.0899714	0.000216865	0.00282632
PF3D7_0625600	1760.96	-0.290594	0.0877643	0.000158509	0.00228063
PF3D7_0702300	909.602	-0.290181	0.0956413	0.00039917	0.0042106
PF3D7_0521000	198.866	-0.290133	0.144831	0.00599183	0.0296955
PF3D7_0705700	1491.9	-0.290034	0.102043	0.000722537	0.00643308
PF3D7_0524400	1229.68	-0.289759	0.0945449	0.000360005	0.00389752
PF3D7_0515000	1249.12	-0.289686	0.0927151	0.000305659	0.00348097
PF3D7_1445400	1170.37	-0.289084	0.0838287	9.89902e-05	0.00164087
PF3D7_1243800	131.194	-0.288538	0.183626	0.0127882	0.0519765
PF3D7_1008800	1975.02	-0.288499	0.0834721	9.61147e-05	0.00163078
PF3D7_1132200	1822.25	-0.288103	0.0900969	0.000236049	0.00300024
PF3D7_0726200	440.679	-0.287881	0.115017	0.00191929	0.01284
PF3D7_1448000	499.298	-0.28777	0.101522	0.000755263	0.00660993
PF3D7_0524900	390.977	-0.287761	0.116529	0.00207744	0.0135618
PF3D7_1244800	824.222	-0.287331	0.110918	0.00149356	0.0108472
PF3D7_1142600	3128.6	-0.287276	0.102352	0.000816354	0.00709282
PF3D7_1323400	4328.94	-0.287163	0.0998827	0.000668208	0.00608032
PF3D7_1358800	2586.04	-0.287045	0.101218	0.000747266	0.00656057
PF3D7_0815200	1971.11	-0.286964	0.0837012	0.000107337	0.00173914
PF3D7_0923000	307.573	-0.286927	0.12275	0.00292528	0.0172779
PF3D7_0416900	232.069	-0.286674	0.133436	0.00454745	0.0240901
PF3D7_1038800	423.836	-0.286548	0.110303	0.00149876	0.0108472
PF3D7_1133100	543.53	-0.28636	0.102286	0.000844915	0.00725336
PF3D7_0721300	642.718	-0.286019	0.0960986	0.000493389	0.00493807
PF3D7_1456800	12686.8	-0.28579	0.0943263	0.000409416	0.00428102
PF3D7_1109400	1427.05	-0.284518	0.0872759	0.000195884	0.00261932
PF3D7_1329000	800.891	-0.283258	0.107696	0.00137454	0.0103207
PF3D7_0627500	1357.37	-0.282955	0.097693	0.000634608	0.00585304
PF3D7_1317800	3809.28	-0.282859	0.0974536	0.000626286	0.00579114
PF3D7_1012600	909.181	-0.282797	0.101319	0.000877222	0.00740696
PF3D7_0210100	1886.4	-0.282121	0.0969575	0.000621535	0.00576201
PF3D7_0218500	411.926	-0.282047	0.113135	0.00204921	0.0134263
PF3D7_1253300	522.013	-0.28196	0.116487	0.0024453	0.0152439
PF3D7_1243100	285.986	-0.281445	0.123848	0.00353056	0.0197559
PF3D7_0708500	336.095	-0.281106	0.122194	0.0033126	0.0189434
PF3D7_0703500	4490.51	-0.281034	0.0877585	0.000241153	0.00303296
PF3D7_0528200	1608.71	-0.280806	0.090152	0.000326156	0.00365478
PF3D7_1252300	2918.61	-0.280591	0.0904476	0.00034204	0.00379728
PF3D7_0716100	317.198	-0.280477	0.123144	0.00351114	0.0197029
PF3D7_0422400	4763.4	-0.280393	0.103216	0.00111505	0.00881499
PF3D7_0709000	3071.27	-0.280378	0.0832883	0.000139677	0.00206757
PF3D7_1426200	639.406	-0.280218	0.100439	0.00090359	0.00752833
PF3D7_0507100	8859.45	-0.280136	0.0980649	0.000730653	0.00648928
PF3D7_1426000	2808.32	-0.279743	0.100016	0.000879349	0.00740753
PF3D7_1118300	2736.93	-0.279533	0.0909446	0.000378136	0.00404808
PF3D7_0830400	1398.24	-0.279049	0.110412	0.00187675	0.0126892
PF3D7_0801500	513.708	-0.279023	0.11104	0.00196712	0.0130114
PF3D7_1470300	197.099	-0.279016	0.153671	0.00918409	0.0410375
PF3D7_1125500	345.559	-0.278864	0.123199	0.0036835	0.0203526
PF3D7_1253000	1367.93	-0.278728	0.0840634	0.000168502	0.00235563
PF3D7_0815600	1482.8	-0.277636	0.0945799	0.000590983	0.00556483
PF3D7_0322900	5313.83	-0.277092	0.093676	0.000549899	0.00528873
PF3D7_1407800	6986.24	-0.276931	0.0850212	0.00020381	0.00269524
PF3D7_0829100	395.446	-0.276822	0.114098	0.00251147	0.015555
PF3D7_1019000	2249.22	-0.276324	0.109086	0.00189137	0.0127641
PF3D7_0307200	5761.88	-0.275813	0.0910141	0.000446511	0.00455652
PF3D7_1105400	5008.44	-0.275777	0.0926701	0.00052344	0.00511634
PF3D7_1001900	1638.57	-0.275516	0.0818915	0.000138717	0.00206184
PF3D7_0814000	4411.36	-0.275421	0.0869709	0.000285787	0.00331104
PF3D7_1231800	2294.65	-0.274961	0.0807391	0.000126266	0.00193282
PF3D7_1241100	464.081	-0.274387	0.104765	0.00153888	0.0110929
PF3D7_1408600	4861.32	-0.274251	0.0936965	0.000617009	0.00574969
PF3D7_1110300	213.722	-0.273686	0.14618	0.00875016	0.0395406
PF3D7_1460400	208.153	-0.273605	0.14681	0.00885228	0.0398227
PF3D7_1219400	105.647	-0.27323	0.191831	0.017488	0.0647165
PF3D7_1405900	406.034	-0.273145	0.113645	0.00273124	0.0165392
PF3D7_0909800	370.728	-0.272937	0.133886	0.00628424	0.0307543
PF3D7_0928500	239.642	-0.272059	0.131807	0.00603611	0.0297831
PF3D7_1006200	2682.31	-0.272051	0.0895757	0.000447164	0.00455652
PF3D7_1357000	4863.66	-0.271836	0.106432	0.00186279	0.0126186
PF3D7_1135400	1101.75	-0.271834	0.0901214	0.000484671	0.00486973
PF3D7_1228900	217.817	-0.27182	0.143402	0.0085354	0.0387161
PF3D7_0918300	996.122	-0.271622	0.0959953	0.000853975	0.0072892
PF3D7_0821100	957.808	-0.271488	0.0905755	0.00050959	0.00504958
PF3D7_1460300	962.574	-0.270552	0.100679	0.00129509	0.00989055
PF3D7_1342000	4461.5	-0.269922	0.094752	0.000827648	0.00713921
PF3D7_1427100	1492.9	-0.269814	0.0844965	0.000272435	0.00322352
PF3D7_0806700	362.491	-0.269787	0.11234	0.00281165	0.0168278
PF3D7_0306800	1623.54	-0.269401	0.0843887	0.000272395	0.00322352
PF3D7_1309300	725.766	-0.269354	0.0950292	0.000851734	0.0072892
PF3D7_0706500	2098	-0.268818	0.0956661	0.000921059	0.00765138
PF3D7_0209800	3339.44	-0.268708	0.0869599	0.000386341	0.00409932
PF3D7_0709300	496.505	-0.268585	0.10313	0.001621	0.0115232
PF3D7_1473900	565.569	-0.268572	0.104024	0.0017657	0.0122374
PF3D7_0417400	1042.57	-0.268139	0.0918485	0.000660152	0.00604122
PF3D7_0505900	284.723	-0.267771	0.135609	0.00747164	0.0351773
PF3D7_1018700	991.403	-0.267632	0.101793	0.00155609	0.0111721
PF3D7_0803100	569.278	-0.266655	0.103297	0.00179151	0.0123147
PF3D7_0922600	3298.93	-0.266476	0.0767103	0.000104467	0.00170804
PF3D7_0205500	328.192	-0.266425	0.121603	0.00475592	0.0249815
PF3D7_1414100	324.357	-0.266232	0.123853	0.00523156	0.0267693
PF3D7_1242700	3219.27	-0.266215	0.0900507	0.000619419	0.00575724
PF3D7_1351400	4058.15	-0.265916	0.0864854	0.00042646	0.00440798
PF3D7_0524000	6400.71	-0.265675	0.0712661	3.96276e-05	0.000902155
PF3D7_0723900	723.569	-0.265644	0.103238	0.00183222	0.0124349
PF3D7_0301600	1380.75	-0.265015	0.0818082	0.000240568	0.00303296
PF3D7_1346500	169.937	-0.26498	0.154793	0.0124858	0.0510754
PF3D7_1357900	514.75	-0.264489	0.121925	0.00506867	0.0262709
PF3D7_1204300	2870.59	-0.264343	0.0985673	0.00136774	0.0102924
PF3D7_0618300	3168.78	-0.264342	0.097285	0.00124654	0.00962126
PF3D7_0520000	3910.28	-0.263865	0.0881293	0.000538011	0.00520222
PF3D7_1434500	1515.19	-0.263821	0.0953697	0.00108629	0.00870244
PF3D7_0209700	1243.5	-0.263108	0.0813243	0.000248319	0.00307321
PF3D7_0619000	782.142	-0.263029	0.0975519	0.00133511	0.0101531
PF3D7_0407200	318.456	-0.262734	0.12053	0.00502578	0.0261239
PF3D7_0915100	456.161	-0.262733	0.118455	0.00441477	0.0235258
PF3D7_1223800	254.766	-0.262423	0.133394	0.00794562	0.0369256
PF3D7_0516900	7677.9	-0.262254	0.0964791	0.00120129	0.00937056
PF3D7_1103100	3963.78	-0.261396	0.0912138	0.000842267	0.00724793
PF3D7_1412800	1055.65	-0.261203	0.0905039	0.000774041	0.00675783
PF3D7_0310300	491.441	-0.261182	0.105995	0.00256379	0.015764
PF3D7_0519700	1499.59	-0.261157	0.0969296	0.00135173	0.0102087
PF3D7_1323100	3405.86	-0.261136	0.087843	0.000588356	0.00555464
PF3D7_0719300	536.548	-0.260981	0.105903	0.00257188	0.0157868
PF3D7_1412500	1181.94	-0.260548	0.105953	0.00258934	0.0158669
PF3D7_1463400	247.731	-0.260526	0.144944	0.0111616	0.047067
PF3D7_0220100	1219.89	-0.259144	0.0908698	0.000892225	0.00749844
PF3D7_0415300	250.918	-0.258996	0.139224	0.00963219	0.042424
PF3D7_1003500	2229.57	-0.258855	0.0962523	0.00143192	0.0106198
PF3D7_1439900	1882.38	-0.258741	0.095657	0.00164993	0.0116827
PF3D7_1216200	770.881	-0.258371	0.111504	0.00375479	0.0206198
PF3D7_1357800	1862.85	-0.258214	0.0856703	0.00052992	0.00516564
PF3D7_0517700	2332.14	-0.258175	0.0882593	0.000691549	0.00620702
PF3D7_0419900	1668.19	-0.258071	0.0845188	0.000468916	0.00475124
PF3D7_0318200	2712.99	-0.258043	0.0936921	0.0011743	0.00918252
PF3D7_0813600	446.869	-0.258018	0.108769	0.00333018	0.0190138
PF3D7_0322000	3457.75	-0.257989	0.0955538	0.00135377	0.0102087
PF3D7_0522800	195.032	-0.257478	0.143874	0.0115114	0.0482593
PF3D7_0503800	1668.88	-0.257426	0.0960443	0.00145666	0.0107135
PF3D7_0210900	1339.68	-0.257024	0.0831192	0.000416541	0.0043429
PF3D7_1414800	566.094	-0.256719	0.104878	0.00274713	0.0165796
PF3D7_1373500	121.788	-0.2567	0.177448	0.0194917	0.0701818
PF3D7_1104000	536.004	-0.256457	0.106225	0.00301862	0.0177291
PF3D7_1450600	275.673	-0.25604	0.125006	0.00705909	0.0334981
PF3D7_1126200	2954.43	-0.256001	0.0858597	0.000597439	0.00561093
PF3D7_0913200	1971.57	-0.255885	0.0879132	0.000739617	0.0065319
PF3D7_0500800	2392.76	-0.25571	0.104955	0.00284737	0.0169354
PF3D7_0213900	215.379	-0.255695	0.153002	0.0142053	0.0556341
PF3D7_1119100	160.541	-0.255283	0.154014	0.0146818	0.0569076
PF3D7_1438900	1932.99	-0.254978	0.0945349	0.00141102	0.0105235
PF3D7_1020400	166.837	-0.254949	0.152367	0.0145771	0.0567525
PF3D7_1143300	665.306	-0.254547	0.0995603	0.00208715	0.0136005
PF3D7_0201700	2215.61	-0.254363	0.07615	0.000183485	0.00249999
PF3D7_0708400	9833.09	-0.254325	0.0950208	0.00144362	0.0106627
PF3D7_1123000	1055.1	-0.25415	0.0947275	0.00146029	0.0107135
PF3D7_1359400	2778.96	-0.254136	0.0939646	0.00139378	0.0104229
PF3D7_0724700	677.005	-0.253362	0.103174	0.00276947	0.0166316
PF3D7_0312800	2816.86	-0.25307	0.0925744	0.00167307	0.011777
PF3D7_1477500	801.118	-0.252943	0.0918384	0.00121192	0.00941527
PF3D7_0722500	336.233	-0.252625	0.124907	0.00771192	0.0361195
PF3D7_0717700	1646.27	-0.252577	0.0981337	0.00196767	0.0130114
PF3D7_1309600	175.225	-0.252347	0.154996	0.0157096	0.0597961
PF3D7_1234100	942.142	-0.251776	0.0974471	0.00196209	0.0130114
PF3D7_1401400	10212.1	-0.250704	0.0986846	0.0022565	0.0144424
PF3D7_1338300	3504.42	-0.250457	0.0930269	0.00148216	0.0107921
PF3D7_0614500	2482.13	-0.250397	0.0847174	0.00068567	0.00618134
PF3D7_0615000	167.407	-0.250299	0.153351	0.0159466	0.0605063
PF3D7_1140700	635.268	-0.250176	0.100004	0.00251249	0.015555
PF3D7_0106700	1034.87	-0.250023	0.117611	0.00622409	0.0305014
PF3D7_1431700	2220.85	-0.249817	0.0886501	0.00102499	0.0083414
PF3D7_0210000	1237.21	-0.249722	0.0951823	0.00180412	0.0123147
PF3D7_1249100	564.666	-0.249387	0.100086	0.00260147	0.0159141
PF3D7_1367700	940.431	-0.24923	0.091866	0.00141601	0.0105235
PF3D7_1341300	3768.01	-0.248943	0.0994813	0.00251905	0.0155688
PF3D7_0309800	329.252	-0.248493	0.122917	0.00796413	0.0369638
PF3D7_0705000	478.288	-0.248048	0.108795	0.00448897	0.0238154
PF3D7_0913000	671.232	-0.247664	0.114127	0.00576986	0.0288653
PF3D7_1139100	445.562	-0.247367	0.116049	0.00636486	0.0310222
PF3D7_0917600	701.325	-0.246872	0.0956615	0.0020671	0.0135188
PF3D7_1316500	374.845	-0.246214	0.111152	0.00529584	0.0269436
PF3D7_0622200	930.106	-0.246181	0.088083	0.00114129	0.00898408
PF3D7_0821600	576.807	-0.245324	0.102745	0.00349332	0.0197029
PF3D7_0202200	1439.58	-0.245302	0.0968732	0.00239631	0.0150582
PF3D7_0818800	647.894	-0.245235	0.105895	0.00417598	0.022622
PF3D7_0725200	266.312	-0.245075	0.1388	0.0135	0.0540149
PF3D7_1007900	1261.47	-0.244888	0.083367	0.000740888	0.0065319
PF3D7_0322400	311.849	-0.244712	0.119967	0.00792932	0.0369256
PF3D7_0719700	1985.16	-0.244667	0.106223	0.00426501	0.0229659
PF3D7_1200700	8264.64	-0.243772	0.0807329	0.000583978	0.0055424
PF3D7_1200800	1069.8	-0.243706	0.0911246	0.00163259	0.0115827
PF3D7_1116800	13044	-0.243706	0.0861611	0.0010512	0.00847793
PF3D7_1037600	598.93	-0.242904	0.100765	0.00339182	0.0192739
PF3D7_1027800	8142.43	-0.242671	0.0964746	0.00234906	0.0149286
PF3D7_1004000	3849.85	-0.242439	0.0916428	0.00169934	0.0118921
PF3D7_1130100	1433.09	-0.242034	0.0906963	0.0016704	0.011777
PF3D7_0935200	511.818	-0.241711	0.109034	0.00546852	0.0276656
PF3D7_1478600	440.814	-0.241707	0.135622	0.013178	0.053081
PF3D7_1124900	1620.33	-0.241622	0.102899	0.00397422	0.0216267
PF3D7_0316800	3315.15	-0.240791	0.0903288	0.00171231	0.0119596
PF3D7_1123500	2421.11	-0.240056	0.0750737	0.000329359	0.0036792
PF3D7_0820000	1201.85	-0.239507	0.0963662	0.0028572	0.0169593
PF3D7_1436000	1078.41	-0.239433	0.0908547	0.00189957	0.0127954
PF3D7_0726500	1687.8	-0.239205	0.0961469	0.00288821	0.0171152
PF3D7_0517300	4235.65	-0.23915	0.0839711	0.00102459	0.0083414
PF3D7_1329500	5375.23	-0.239092	0.0839441	0.00106677	0.00858426
PF3D7_1129400	465.16	-0.238947	0.11614	0.00793403	0.0369256
PF3D7_0907200	821.069	-0.238561	0.0943329	0.00254511	0.015676
PF3D7_0621300	345.409	-0.238461	0.112707	0.00707268	0.0335183
PF3D7_1347200	3425.93	-0.237906	0.087076	0.00146242	0.0107135
PF3D7_0314500	330.118	-0.237551	0.119599	0.00939681	0.0417288
PF3D7_1324400	770.858	-0.237524	0.103873	0.00475738	0.0249815
PF3D7_1412200	136.979	-0.236845	0.16311	0.023211	0.0786158
PF3D7_1119200	176.101	-0.236464	0.150726	0.0197774	0.0707149
PF3D7_1102700	4752.56	-0.235924	0.088653	0.00181347	0.0123543
PF3D7_1142100	1418.21	-0.235867	0.103096	0.00484566	0.0252973
PF3D7_0616900	181.017	-0.235675	0.152366	0.0208193	0.0734389
PF3D7_1471900	96.0451	-0.235189	0.191544	0.0293863	0.0933005
PF3D7_1035200	652.199	-0.234621	0.120861	0.0105593	0.0451628
PF3D7_0309500	2602.07	-0.234433	0.0922153	0.00254436	0.015676
PF3D7_1106000	1038.11	-0.234295	0.0862573	0.00158354	0.0113451
PF3D7_0526300	319.287	-0.234291	0.120123	0.0103764	0.0445392
PF3D7_1118600	724.482	-0.234001	0.094769	0.00311018	0.018015
PF3D7_0212500	1242.69	-0.233871	0.0897747	0.00216903	0.0139821
PF3D7_0717400	556.83	-0.233587	0.0996032	0.0042878	0.0230542
PF3D7_1107700	481.356	-0.23354	0.10833	0.00676569	0.0324346
PF3D7_0209200	305.961	-0.233275	0.122953	0.0116354	0.0487225
PF3D7_1434600	975.305	-0.233128	0.0902608	0.00233572	0.01487
PF3D7_1366300	1638.71	-0.233046	0.089759	0.00223198	0.0143621
PF3D7_1418900	407.281	-0.232907	0.10873	0.00702311	0.0333714
PF3D7_0626800	7755.34	-0.232296	0.0955769	0.00358965	0.0199875
PF3D7_0215700	2665.32	-0.23224	0.0753825	0.00051317	0.00507108
PF3D7_1030100	626.616	-0.232024	0.0994402	0.00447282	0.0237647
PF3D7_1470600	209.596	-0.231466	0.137503	0.0173606	0.0643773
PF3D7_1467500	236.95	-0.230824	0.129072	0.0145886	0.0567525
PF3D7_1019400	1474.53	-0.230322	0.0943187	0.00343683	0.0194989
PF3D7_1347500	6735.47	-0.229815	0.0984798	0.00438453	0.0234341
PF3D7_1445700	1046.84	-0.229803	0.0928488	0.00317258	0.0183174
PF3D7_0315100	1029.97	-0.229429	0.0999989	0.00498236	0.0259357
PF3D7_0807600	1448.07	-0.229345	0.0864999	0.00196781	0.0130114
PF3D7_1309100	2943.68	-0.229202	0.0804323	0.00110514	0.00878666
PF3D7_1124100	619.567	-0.228985	0.0966971	0.00423119	0.022818
PF3D7_0935000	528.129	-0.22895	0.10948	0.00810103	0.0374062
PF3D7_0703900	892.151	-0.228912	0.0916326	0.00292337	0.0172779
PF3D7_0309600	2808.71	-0.228503	0.0941731	0.00364161	0.0202143
PF3D7_0628200	2224.74	-0.228392	0.102029	0.00580053	0.0289785
PF3D7_1202700	267.805	-0.228377	0.124581	0.0137223	0.0544838
PF3D7_0213700	276.854	-0.228337	0.141739	0.019948	0.0711834
PF3D7_0931100	991.831	-0.228276	0.092454	0.00322496	0.0185603
PF3D7_1325100	1778.48	-0.228179	0.0898708	0.00271726	0.0164895
PF3D7_1410600	3360.06	-0.227991	0.0900694	0.00276732	0.0166316
PF3D7_0730900	2948.18	-0.227566	0.0994762	0.00518339	0.0266352
PF3D7_1351100	246.282	-0.227386	0.134732	0.0179067	0.065658
PF3D7_0219200	1377.26	-0.226823	0.104916	0.00702107	0.0333714
PF3D7_0102900	860.801	-0.226659	0.0905155	0.0030379	0.0177793
PF3D7_0603400	338.682	-0.226612	0.12102	0.0130464	0.0527487
PF3D7_0926100	2055.06	-0.226405	0.0838629	0.00176029	0.0122235
PF3D7_0532100	5118.06	-0.226322	0.108044	0.00814267	0.0374101
PF3D7_0530700	136.621	-0.225982	0.162988	0.0280224	0.089941
PF3D7_1004300	2120.98	-0.225472	0.0927732	0.00369508	0.0203611
PF3D7_1309500	209.868	-0.225228	0.143687	0.0221632	0.0765575
PF3D7_1003800	790.854	-0.225126	0.094865	0.00430707	0.0231232
PF3D7_0519400	3007.88	-0.225038	0.0958826	0.00463533	0.0244835
PF3D7_1033600	695.86	-0.22464	0.10037	0.00595784	0.0295999
PF3D7_1203100	196.578	-0.224441	0.141876	0.0216974	0.0756989
PF3D7_1144300	735.612	-0.224302	0.108915	0.00900922	0.0404571
PF3D7_1338200	3195.75	-0.224298	0.0921196	0.00363195	0.0201918
PF3D7_0807300	1617.86	-0.224009	0.0924894	0.00380552	0.0208348
PF3D7_0113900	1555.99	-0.223969	0.0926377	0.00386957	0.0211212
PF3D7_0113700	1192.53	-0.223351	0.0857915	0.00236884	0.0150277
PF3D7_0401600	1254.94	-0.223339	0.0932898	0.00413618	0.0224402
PF3D7_0110600	1833.6	-0.223148	0.0960489	0.00480932	0.0251807
PF3D7_0714300	284.428	-0.222984	0.138288	0.0211563	0.0742433
PF3D7_0212300	1412.81	-0.222979	0.0868273	0.00261255	0.0159414
PF3D7_0304900	185.841	-0.222966	0.14318	0.022805	0.0777515
PF3D7_0807000	301.118	-0.222923	0.122005	0.014626	0.0567525
PF3D7_0720200	186.947	-0.222823	0.145992	0.0240022	0.0806126
PF3D7_0831500	1198.14	-0.22274	0.0859359	0.00246171	0.0153197
PF3D7_1462800	9073.08	-0.222469	0.100294	0.00647217	0.0314348
PF3D7_0526500	677.585	-0.222434	0.097817	0.00562087	0.0283169
PF3D7_0821800	859.497	-0.222101	0.0985466	0.00590259	0.029366
PF3D7_0405400	3935.86	-0.222099	0.091213	0.00376332	0.0206351
PF3D7_0418400	188.395	-0.221983	0.168251	0.031085	0.0972285
PF3D7_0627900	175.016	-0.221609	0.156234	0.0279366	0.0898016
PF3D7_1010600	1492.96	-0.221259	0.0952089	0.00505598	0.0262429
PF3D7_0929300	71.0405	-0.221165	0.21779	0.0378033	0.111628
PF3D7_0218400	380.55	-0.221023	0.114585	0.0122002	0.0504414
PF3D7_0724400	232.707	-0.220743	0.133251	0.0201382	0.0717031
PF3D7_1115300	659.721	-0.220473	0.107884	0.00966652	0.042424
PF3D7_0818700	1238.38	-0.220449	0.0971959	0.00570626	0.0286268
PF3D7_1251600	424.452	-0.219756	0.108861	0.0103218	0.0444641
PF3D7_1441000	171.847	-0.219425	0.151395	0.0275856	0.0890811
PF3D7_0518500	312.304	-0.219309	0.130013	0.0192426	0.0696336
PF3D7_1103700	692.819	-0.21913	0.0971601	0.00603446	0.0297831
PF3D7_0906600	4852.87	-0.218975	0.0743093	0.000877083	0.00740696
PF3D7_0615400	777.449	-0.218596	0.108721	0.0105268	0.0451224
PF3D7_0925200	228.277	-0.218309	0.139518	0.0236799	0.0798283
PF3D7_1020700	528.386	-0.218302	0.0980428	0.00654594	0.0316901
PF3D7_0113300	684.506	-0.218142	0.0928191	0.00484328	0.0252973
PF3D7_0502800	86.7001	-0.217491	0.196744	0.0386898	0.113606
PF3D7_0914700	2963.46	-0.217327	0.0783042	0.00152208	0.0109938
PF3D7_0113800	199.044	-0.217024	0.158611	0.030953	0.0972285
PF3D7_1240900	239.582	-0.216943	0.130692	0.0207565	0.0734133
PF3D7_1202500	82.0784	-0.216339	0.20277	0.0391903	0.11479
PF3D7_0830600	1075.08	-0.21532	0.0946948	0.00602255	0.0297831
PF3D7_0513200	572.672	-0.215297	0.0964593	0.00663707	0.0319592
PF3D7_1351000	971.152	-0.215207	0.100264	0.00804352	0.0372842
PF3D7_1406000	130.554	-0.215151	0.162401	0.0335126	0.102591
PF3D7_1447100	348.129	-0.21464	0.124158	0.0190041	0.0690483
PF3D7_0731300	3698.29	-0.214609	0.0862879	0.00350176	0.0197029
PF3D7_1330800	1470.52	-0.214458	0.0924474	0.00538791	0.0273733
PF3D7_0710600	2698.48	-0.214025	0.0923323	0.0055489	0.0279936
PF3D7_1412400	557.459	-0.21396	0.102228	0.00926683	0.0412534
PF3D7_1323900	291.921	-0.213473	0.127212	0.020825	0.0734389
PF3D7_0802300	529.837	-0.213316	0.103366	0.00989617	0.0431025
PF3D7_0407300	233.889	-0.213171	0.129976	0.0222381	0.0766926
PF3D7_1327800	904.408	-0.212345	0.0886815	0.00456964	0.0241721
PF3D7_1332700	427.058	-0.212128	0.11319	0.014773	0.0571202
PF3D7_1415200	149.793	-0.211679	0.15554	0.0332281	0.101894
PF3D7_1125300	168.614	-0.211517	0.156517	0.0339202	0.103541
PF3D7_1113700	211.027	-0.211083	0.135094	0.0256128	0.0845223
PF3D7_1009400	413.584	-0.211049	0.113764	0.0154856	0.0593201
PF3D7_0617000	504.068	-0.211027	0.106467	0.0120013	0.0497334
PF3D7_0623600	453.496	-0.210075	0.107069	0.0127282	0.0517913
PF3D7_1217200	578.45	-0.209939	0.111393	0.0147842	0.0571202
PF3D7_1408700	1684.88	-0.209516	0.0982923	0.00880182	0.0396789
PF3D7_1027100	373.033	-0.209446	0.114222	0.016478	0.0620643
PF3D7_0902600	345.915	-0.209409	0.114475	0.0164352	0.0619681
PF3D7_0213100	723.473	-0.209394	0.117071	0.0177756	0.0653773
PF3D7_1146000	449.161	-0.209289	0.108159	0.0135374	0.0541045
PF3D7_1402500	1996.29	-0.20922	0.0866175	0.00439663	0.0234639
PF3D7_1144000	2026.48	-0.20914	0.100876	0.0100419	0.0435714
PF3D7_1361200	654.312	-0.209076	0.0999426	0.00967172	0.042424
PF3D7_0523800	776.399	-0.208896	0.103399	0.0112865	0.0475382
PF3D7_1331800	2611.11	-0.208777	0.106099	0.0124955	0.0510754
PF3D7_0608700	1656.4	-0.2084	0.0844499	0.00384313	0.0210087
PF3D7_0727300	205.44	-0.207864	0.13724	0.0283498	0.0907427
PF3D7_1407900	4257.49	-0.207549	0.0808868	0.0029378	0.0173234
PF3D7_1344900	667.835	-0.207334	0.101252	0.0108538	0.0460389
PF3D7_0930400	517.555	-0.206975	0.104303	0.0124785	0.0510754
PF3D7_1211400	1738.45	-0.206867	0.0912867	0.00657847	0.0317621
PF3D7_0610900	933.159	-0.206595	0.0989456	0.00995363	0.0432406
PF3D7_1308300	1476.49	-0.206534	0.0892724	0.00588288	0.0293085
PF3D7_1412700	116.902	-0.206439	0.172175	0.040732	0.118172
PF3D7_1419100	379.512	-0.206395	0.111999	0.0166109	0.0623689
PF3D7_1349200	1583.08	-0.205789	0.0784398	0.0026148	0.0159414
PF3D7_1457700	571.396	-0.205622	0.102488	0.0120606	0.0499219
PF3D7_0110100	175.914	-0.205444	0.140383	0.0313577	0.0977414
PF3D7_1368200	1837.86	-0.205369	0.0941288	0.0082695	0.037844
PF3D7_1316100	376.37	-0.205325	0.119252	0.0210504	0.0740159
PF3D7_1459200	127.011	-0.205106	0.171802	0.0421114	0.121277
PF3D7_1417200	2534.85	-0.204861	0.0976552	0.00989787	0.0431025
PF3D7_1237200	500.123	-0.204622	0.100593	0.0114865	0.0482112
PF3D7_1126400	260.259	-0.2046	0.133804	0.0288927	0.0921338
PF3D7_1358900	274.759	-0.204499	0.137157	0.030402	0.0959644
PF3D7_1414300	5480.11	-0.204462	0.0914169	0.006977	0.0332401
PF3D7_1323200	602.616	-0.204334	0.0991493	0.0108304	0.0460206
PF3D7_0529500	441.114	-0.203903	0.11284	0.0181689	0.0664163
PF3D7_1355900	355.988	-0.203754	0.11407	0.0189461	0.0689069
PF3D7_0506100	285.392	-0.203515	0.119753	0.0222779	0.0767319
PF3D7_1309700	295.898	-0.203293	0.122969	0.0241369	0.0809138
PF3D7_1415800	290.931	-0.203195	0.123408	0.0243018	0.081304
PF3D7_0419800	319.083	-0.20316	0.116343	0.0205187	0.0727149
PF3D7_1423200	272.038	-0.202717	0.120649	0.0231302	0.0784898
PF3D7_1028400	480.131	-0.202683	0.108613	0.0165386	0.0622274
PF3D7_1417500	750.545	-0.201796	0.0965901	0.010368	0.0445392
PF3D7_0312900	166.006	-0.201408	0.151206	0.0382697	0.112648
PF3D7_0628600	415.724	-0.201105	0.108611	0.0173379	0.0643597
PF3D7_1006800	4015.6	-0.200749	0.0900563	0.00760698	0.035721
PF3D7_0308200	423.631	-0.20045	0.116581	0.0220851	0.0764581
PF3D7_0522300	487.102	-0.200335	0.107334	0.0168869	0.0630761
PF3D7_0905200	471.907	-0.199668	0.100643	0.0134314	0.0538603
PF3D7_0827800	936.461	-0.199653	0.107671	0.0173292	0.0643597
PF3D7_0307100	3138.85	-0.199236	0.0985804	0.0123522	0.0508361
PF3D7_1422700	336.607	-0.198886	0.116632	0.0230736	0.0783719
PF3D7_0626000	267.248	-0.198653	0.132094	0.0319923	0.0991182
PF3D7_0703700	924.65	-0.19845	0.111736	0.0200939	0.0716329
PF3D7_0729400	675.258	-0.198143	0.101247	0.014349	0.0561015
PF3D7_0918800	386.779	-0.197989	0.112862	0.0213205	0.0746012
PF3D7_1322100	601.472	-0.197858	0.0948207	0.0108862	0.0461223
PF3D7_1001700	1431.98	-0.196771	0.0823695	0.0052544	0.0268086
PF3D7_0819100	220.452	-0.196421	0.128064	0.031217	0.0974718
PF3D7_1124300	778.157	-0.19634	0.0918049	0.00981042	0.0428254
PF3D7_0528700	531.916	-0.19621	0.114799	0.0234542	0.0792158
PF3D7_0317800	243.136	-0.195998	0.13223	0.0338106	0.103415
PF3D7_0526900	940.547	-0.195871	0.101919	0.0157349	0.0598294
PF3D7_1340900	6924.3	-0.195782	0.083856	0.00599359	0.0296955
PF3D7_0923200	402.539	-0.195652	0.112567	0.0224648	0.076958
PF3D7_1324200	380.789	-0.195615	0.119937	0.0270146	0.0877791
PF3D7_0704600	2411.21	-0.19549	0.0968493	0.0128763	0.052221
PF3D7_1453900	586.293	-0.195014	0.10192	0.0162305	0.0612603
PF3D7_1446500	1261.03	-0.194981	0.0964436	0.0128774	0.052221
PF3D7_0202600	298.456	-0.194508	0.130546	0.0339668	0.103541
PF3D7_0512200	150.379	-0.194493	0.150135	0.0430851	0.123193
PF3D7_0711500	786.288	-0.194399	0.0949369	0.0122552	0.0504949
PF3D7_0729000	165.331	-0.194284	0.148603	0.0424566	0.121881
PF3D7_1464000	532.605	-0.194239	0.106983	0.0196798	0.070647
PF3D7_0205700	256.362	-0.193752	0.124572	0.0310184	0.0972285
PF3D7_1216400	688.191	-0.193248	0.0925985	0.0113555	0.0477168
PF3D7_0832200	401.02	-0.193145	0.118022	0.0275887	0.0890811
PF3D7_1430300	683.536	-0.193039	0.114429	0.0251809	0.0834029
PF3D7_1473500	258.769	-0.192962	0.122913	0.0306573	0.0964779
PF3D7_0730800	5036.47	-0.192922	0.082423	0.00621749	0.0305014
PF3D7_0928900	142.614	-0.192614	0.159307	0.0476154	0.132769
PF3D7_0804800	325.534	-0.192561	0.116681	0.0269865	0.0877791
PF3D7_0923900	1466.04	-0.192175	0.0859058	0.00808508	0.0373805
PF3D7_1248200	573.328	-0.192083	0.10201	0.0176987	0.0652275
PF3D7_1423800	470.833	-0.192066	0.109585	0.0228867	0.0778839
PF3D7_0322700	373.773	-0.192005	0.112445	0.0247292	0.0823619
PF3D7_0218700	385.613	-0.191857	0.113617	0.025422	0.0839695
PF3D7_0505800	828.002	-0.191465	0.0975199	0.0150937	0.0580663
PF3D7_1365000	174.641	-0.191267	0.151731	0.0463393	0.130221
PF3D7_1407300	950.434	-0.191189	0.0861842	0.00857302	0.0388377
PF3D7_1429400	301.454	-0.190988	0.11608	0.0277524	0.0893691
PF3D7_1472100	461.73	-0.190783	0.107056	0.0219522	0.0762181
PF3D7_1207100	940.347	-0.190636	0.0869734	0.00915911	0.0410278
PF3D7_1420700	7412.81	-0.190578	0.074896	0.00418802	0.0226531
PF3D7_0424500	1565.7	-0.190338	0.0823755	0.00677187	0.0324346
PF3D7_0507800	1580.15	-0.190299	0.102028	0.0183621	0.0669863
PF3D7_0917900	17953.6	-0.190137	0.0820127	0.00654136	0.0316901
PF3D7_1014400	220.734	-0.190104	0.128684	0.0361401	0.10806
PF3D7_0508700	484.855	-0.190061	0.109799	0.0242095	0.0810816
PF3D7_1104200	2630.91	-0.189598	0.0850021	0.00835433	0.0380869
PF3D7_1468100	4575.18	-0.189071	0.0906736	0.011909	0.0495223
PF3D7_1442900	2315.6	-0.188717	0.0905044	0.0116663	0.0487951
PF3D7_1472200	1287.51	-0.188599	0.0942882	0.0141838	0.0556341
PF3D7_1472000	170.051	-0.186636	0.144928	0.0474483	0.132509
PF3D7_1364500	364.455	-0.186279	0.113581	0.0293882	0.0933005
PF3D7_1251100	541.192	-0.186193	0.0999459	0.019609	0.0704633
PF3D7_1229400	2345.78	-0.18576	0.100902	0.0201534	0.0717031
PF3D7_1367400	290.9	-0.185692	0.121669	0.0354999	0.106678
PF3D7_1419400	682.548	-0.185559	0.101155	0.0208667	0.0735138
PF3D7_1447000	5547.69	-0.185269	0.0957472	0.0169459	0.0632307
PF3D7_1250600	357.21	-0.185189	0.111061	0.0283555	0.0907427
PF3D7_1016400	1722.07	-0.185024	0.0813908	0.00791767	0.0369256
PF3D7_1432500	172.377	-0.184746	0.141805	0.0478406	0.133191
PF3D7_1445500	204.978	-0.184722	0.135276	0.0443168	0.125815
PF3D7_1234800	1153.31	-0.184694	0.0817337	0.00821161	0.0376749
PF3D7_1225400	183.063	-0.18445	0.139473	0.0467197	0.130983
PF3D7_0916700	5161.35	-0.184446	0.0949646	0.0167044	0.0625894
PF3D7_1352700	543.297	-0.184083	0.101557	0.0221428	0.0765575
PF3D7_0422100	269.105	-0.183885	0.119054	0.0352174	0.105917
PF3D7_0606600	1370.96	-0.183564	0.0972289	0.0190591	0.0691115
PF3D7_1033700	846.944	-0.183465	0.0957607	0.0179846	0.0658094
PF3D7_1353000	1979.38	-0.183114	0.0787515	0.00708402	0.0335279
PF3D7_1364300	391.862	-0.182652	0.104066	0.0249514	0.0828375
PF3D7_0811300	4178.15	-0.182265	0.0900312	0.0145433	0.0567525
PF3D7_0410400	224.432	-0.182227	0.12891	0.0429452	0.123055
PF3D7_1364400	724.944	-0.181615	0.0886005	0.0137271	0.0544838
PF3D7_0211800	1946.98	-0.181597	0.0820708	0.0094876	0.0419765
PF3D7_0807200	478.774	-0.181519	0.106553	0.0277463	0.0893691
PF3D7_0217800	2442.22	-0.181512	0.103097	0.024771	0.0824249
PF3D7_1464400	312.162	-0.181267	0.118578	0.03686	0.109847
PF3D7_0310500	543.362	-0.181252	0.111503	0.0317863	0.0987353
PF3D7_1021400	1114.12	-0.181091	0.0875065	0.0133152	0.0534539
PF3D7_0422700	477.341	-0.18099	0.114802	0.0343084	0.104141
PF3D7_1466800	340.708	-0.180986	0.109152	0.0301953	0.0956097
PF3D7_1129900	1158.34	-0.180958	0.0915567	0.0149045	0.0574
PF3D7_1346100	4452.09	-0.180944	0.0828346	0.010155	0.0438505
PF3D7_0619900	229.743	-0.180904	0.124576	0.0415281	0.119981
PF3D7_0519500	388.138	-0.180728	0.10932	0.0304164	0.0959644
PF3D7_1462400	885.149	-0.180575	0.0877417	0.0129926	0.052629
PF3D7_0527900	694.26	-0.180344	0.0933421	0.0179666	0.0658094
PF3D7_1305300	952.614	-0.180076	0.101202	0.0244123	0.081485
PF3D7_1302600	520.852	-0.179777	0.0994859	0.0230175	0.0782553
PF3D7_1252600	1578.47	-0.179452	0.09116	0.0167955	0.0627999
PF3D7_1311900	2863.04	-0.179275	0.0869506	0.013727	0.0544838
PF3D7_1423000	727.181	-0.179032	0.0931656	0.0186376	0.0678536
PF3D7_0711100	304.167	-0.178963	0.118042	0.0387475	0.113682
PF3D7_1326300	585.126	-0.178887	0.0988219	0.0233009	0.0788083
PF3D7_1476400	347.755	-0.178735	0.117036	0.0382034	0.112545
PF3D7_0929200	1147.62	-0.178662	0.0910274	0.0171614	0.0638361
PF3D7_1431200	373.064	-0.178636	0.106279	0.0296958	0.094194
PF3D7_0316600	2312.52	-0.178387	0.0773995	0.00767653	0.0360006
PF3D7_0103300	335.768	-0.178125	0.115864	0.0378299	0.111628
PF3D7_1419700	1056.41	-0.177768	0.0834301	0.0119892	0.0497334
PF3D7_1438500	294.838	-0.176922	0.11421	0.0376543	0.111527
PF3D7_1317900	216.688	-0.176915	0.12722	0.0471695	0.131935
PF3D7_1468700	5918.5	-0.176905	0.1061	0.0310764	0.0972285
PF3D7_1366900	2678.44	-0.176552	0.0882183	0.0161057	0.0609173
PF3D7_1469300	305.211	-0.176254	0.116813	0.0402134	0.117219
PF3D7_1126000	1697.68	-0.175538	0.0801232	0.0105971	0.0451906
PF3D7_1404500	238.84	-0.17524	0.124887	0.0473086	0.132222
PF3D7_0409800	978.505	-0.174886	0.0831046	0.0132548	0.0532709
PF3D7_1332800	568.597	-0.174774	0.093925	0.0220366	0.0763637
PF3D7_1212500	1161.22	-0.1746	0.0911923	0.0197491	0.0707019
PF3D7_0306900	2148.31	-0.174378	0.106582	0.033012	0.101438
PF3D7_1332900	1513.73	-0.173954	0.0861874	0.0156802	0.0597576
PF3D7_1022600	677.703	-0.173686	0.0979836	0.0263599	0.0862753
PF3D7_0822800	349.963	-0.173571	0.107525	0.0351586	0.105829
PF3D7_0318300	507.977	-0.173375	0.0970055	0.0258264	0.0850709
PF3D7_1459400	619.255	-0.173187	0.103695	0.0320463	0.0992
PF3D7_1360200	642.883	-0.172934	0.0976733	0.0267326	0.0871778
PF3D7_0612100	964.508	-0.172549	0.0939127	0.0234892	0.0792595
PF3D7_0611700	1354.74	-0.172184	0.106268	0.0350615	0.105714
PF3D7_1033100	6522	-0.171871	0.0911531	0.0208	0.0734389
PF3D7_0905700	273.996	-0.171802	0.114882	0.0433024	0.123618
PF3D7_1462300	1130.85	-0.171663	0.0882464	0.0190792	0.0691115
PF3D7_0925900	2642.54	-0.171582	0.0834182	0.0147415	0.0570778
PF3D7_1201500	357.148	-0.171423	0.111571	0.0407376	0.118172
PF3D7_1135100	2369.16	-0.171117	0.0809412	0.0132445	0.0532709
PF3D7_1461900	733.664	-0.170671	0.0899967	0.0212383	0.0744583
PF3D7_0728000	2214.07	-0.168793	0.08229	0.0153701	0.0590033
PF3D7_0905800	306.363	-0.16856	0.116701	0.0483421	0.134172
PF3D7_1221900	1213.36	-0.168499	0.0821865	0.0156828	0.0597576
PF3D7_0823200	3307.39	-0.168472	0.0909375	0.0238005	0.0800845
PF3D7_1136300	1166.65	-0.167875	0.082246	0.016091	0.0609173
PF3D7_0511000	1380.26	-0.167718	0.0919423	0.0253556	0.0839044
PF3D7_0629700	2234.55	-0.167649	0.100672	0.0341617	0.103804
PF3D7_0811400	1530.81	-0.166826	0.0788752	0.0137574	0.0544992
PF3D7_1453700	2917.68	-0.166634	0.0882253	0.0223201	0.0767545
PF3D7_1235900	421.953	-0.166376	0.104553	0.0394736	0.115436
PF3D7_0907700	1545.87	-0.166116	0.0866763	0.0214102	0.0748421
PF3D7_1213900	2350.14	-0.165389	0.0765537	0.0124025	0.0509372
PF3D7_1107300	4299.28	-0.164853	0.104083	0.0406383	0.118154
PF3D7_0804000	963.305	-0.164751	0.0916888	0.0276862	0.089316
PF3D7_0422200	393.509	-0.164478	0.112371	0.0492794	0.135762
PF3D7_0406100	2801.8	-0.163382	0.0828193	0.0192918	0.0697415
PF3D7_0729300	319.927	-0.163338	0.110749	0.0490523	0.135379
PF3D7_1334200	397.574	-0.163	0.111225	0.0498581	0.136961
PF3D7_1355300	405.258	-0.162746	0.101749	0.0404947	0.117943
PF3D7_1134000	1928.76	-0.16264	0.0850303	0.0223756	0.0767987
PF3D7_0302000	463.795	-0.162528	0.101661	0.0406657	0.118154
PF3D7_0912500	907.996	-0.162307	0.0893964	0.0272485	0.0883796
PF3D7_0714500	374.798	-0.162039	0.104558	0.0443079	0.125815
PF3D7_1027400	365.241	-0.161773	0.109481	0.0496681	0.136587
PF3D7_0322100	349.529	-0.161523	0.107513	0.0480735	0.133632
PF3D7_1004400	634.687	-0.160584	0.100145	0.0411821	0.119108
PF3D7_1121700	907.459	-0.160092	0.0866928	0.0266285	0.0869173
PF3D7_0630900	390.518	-0.159854	0.101923	0.0440371	0.125317
PF3D7_0720700	2084.82	-0.159528	0.091141	0.0319422	0.0990483
PF3D7_0212100	1247	-0.158755	0.0896897	0.031033	0.0972285
PF3D7_1408000	2437.41	-0.158712	0.0777042	0.0175569	0.0649046
PF3D7_0214000	988.588	-0.158691	0.0861948	0.0269344	0.0877564
PF3D7_0610100	550.79	-0.158449	0.0953557	0.03802	0.112097
PF3D7_1138800	835.765	-0.15837	0.097829	0.0410074	0.118763
PF3D7_1119900	662.029	-0.157623	0.094424	0.0377795	0.111628
PF3D7_1413900	580.509	-0.157542	0.10272	0.0477147	0.132943
PF3D7_1454400	2400.28	-0.157064	0.0715453	0.0139846	0.0551261
PF3D7_0802400	464.257	-0.156763	0.101176	0.0470532	0.131712
PF3D7_0604500	3903.12	-0.155387	0.0974095	0.0440915	0.125373
PF3D7_0513300	1716.38	-0.154718	0.095964	0.0431367	0.123243
PF3D7_1365900	3469.72	-0.154656	0.0848205	0.0289307	0.0921734
PF3D7_1105700	779.106	-0.154395	0.0939568	0.0408861	0.118507
PF3D7_1359900	1083.55	-0.154109	0.0889434	0.0350922	0.105718
PF3D7_0323800	425.446	-0.153837	0.0992252	0.0484079	0.134251
PF3D7_0415000	663.751	-0.153302	0.0894974	0.0364664	0.108854
PF3D7_1203700	4481.45	-0.153187	0.0790949	0.0222921	0.0767319
PF3D7_1437900	2234.11	-0.152846	0.0802958	0.0244206	0.081485
PF3D7_1471100	6236.1	-0.151754	0.0871814	0.0348396	0.105309
PF3D7_1437000	743.17	-0.151371	0.0918865	0.0419966	0.121043
PF3D7_0722400	1128.9	-0.151126	0.0843633	0.0321969	0.0994952
PF3D7_0722600	746.555	-0.15101	0.0963892	0.0485515	0.134545
PF3D7_0627300	1652.39	-0.150529	0.0803878	0.0274601	0.0889854
PF3D7_1438000	1399	-0.150489	0.0800271	0.0270086	0.0877791
PF3D7_0807900	1533.31	-0.149915	0.0890417	0.0399728	0.116612
PF3D7_0320300	1376.4	-0.149438	0.0806228	0.028798	0.0919135
PF3D7_1012400	2550.04	-0.149237	0.0881562	0.039155	0.114784
PF3D7_0502400	1329.07	-0.149092	0.0787576	0.026601	0.0869061
PF3D7_0609700	1628.95	-0.148171	0.0876095	0.0490784	0.135379
PF3D7_1129000	960.76	-0.147766	0.0895873	0.0436613	0.124445
PF3D7_1002400	1814.31	-0.147593	0.0811002	0.0313441	0.0977414
PF3D7_1454700	1156.6	-0.147097	0.0847873	0.0376032	0.111527
PF3D7_1432100	887.82	-0.147032	0.0873831	0.0411929	0.119108
PF3D7_0215400	804.745	-0.146348	0.0921015	0.0487883	0.134993
PF3D7_0220200	1138.46	-0.145695	0.0883705	0.0446993	0.126701
PF3D7_0409100	779.009	-0.144928	0.0898022	0.0475414	0.132666
PF3D7_1002100	4370.83	-0.142666	0.0802006	0.0358156	0.10747
PF3D7_0812400	2249.41	-0.139427	0.0835718	0.0459061	0.129104
PF3D7_1143400	1103.79	-0.138452	0.0849223	0.0496104	0.136533
PF3D7_1404800	4220.31	-0.136976	0.0697399	0.0259903	0.0854545
PF3D7_0528100	2039.05	-0.135946	0.0742147	0.0340769	0.103789
PF3D7_0624000	3979.82	-0.129987	0.0767955	0.0479894	0.133502
PF3D7_0614300	1995.5	-0.128551	0.0744398	0.0453312	0.128189
PF3D7_0627700	2523.58	-0.123884	0.0716984	0.0468738	0.131312
PF3D7_0707420	982.647	0.117849	0.211709	0.0237063	0.0798424
PF3D7_0515700	4338.64	0.131279	0.0781	0.048968	0.135282
PF3D7_1427900	976.516	0.137746	0.0809308	0.0438165	0.124789
PF3D7_1405600	1024.29	0.138017	0.0828653	0.0467105	0.130983
PF3D7_0908000	962.974	0.138698	0.0833648	0.0466981	0.130983
PF3D7_0817700	2991.23	0.140903	0.0700918	0.0225264	0.0770534
PF3D7_1126700	1347.82	0.142838	0.0838572	0.0416824	0.120234
PF3D7_1309200	931.999	0.146804	0.0835558	0.0360741	0.107952
PF3D7_1406800	3186.41	0.148232	0.0789865	0.0280871	0.090044
PF3D7_0207000	1997.11	0.149755	0.0809438	0.0291408	0.0926787
PF3D7_1244100	597.938	0.151779	0.0974244	0.0492925	0.135762
PF3D7_0316300	1088.25	0.152618	0.0826907	0.0285294	0.0912179
PF3D7_1401600	2292.9	0.152852	0.0754807	0.0194166	0.0701021
PF3D7_0803200	511.266	0.154256	0.095132	0.0430366	0.123152
PF3D7_1328300	955.239	0.154395	0.0835376	0.0278552	0.0896199
PF3D7_0605900	824.405	0.156283	0.0959975	0.0416065	0.120111
PF3D7_0417200	470.637	0.156376	0.0965556	0.0421582	0.121315
PF3D7_1329100	1070.75	0.159184	0.0870765	0.0275836	0.0890811
PF3D7_0323400	1119.84	0.159499	0.0998065	0.0424178	0.121867
PF3D7_1433300	499.17	0.160067	0.0976374	0.0392207	0.11479
PF3D7_1414400	1729.59	0.160199	0.0783279	0.0176624	0.0651605
PF3D7_1125700	781.117	0.160988	0.0919926	0.0317342	0.0986585
PF3D7_0106000	573.874	0.161517	0.0971515	0.0370818	0.110239
PF3D7_0919400	721.294	0.162513	0.0871691	0.0249559	0.0828375
PF3D7_1114100	980.893	0.163298	0.085037	0.0219322	0.0762181
PF3D7_1449200	2155.48	0.163628	0.0870687	0.0238336	0.0801208
PF3D7_0320500	406.114	0.164723	0.108586	0.0456792	0.128843
PF3D7_0805600	1346.45	0.165082	0.0928065	0.028634	0.0914711
PF3D7_0311300	877.819	0.165445	0.0843734	0.0197541	0.0707019
PF3D7_1035700	4028.44	0.16626	0.0750916	0.0109744	0.0464409
PF3D7_1019900	396.921	0.166629	0.104599	0.0395978	0.115705
PF3D7_0220000	6695.08	0.167548	0.07702	0.0117887	0.0491927
PF3D7_1221000	852.918	0.16834	0.103973	0.036988	0.110137
PF3D7_0613700	476.584	0.16914	0.0989539	0.0302406	0.0956688
PF3D7_1110500	288.506	0.169964	0.117925	0.0481931	0.133861
PF3D7_1456000	331.394	0.171479	0.117097	0.0456798	0.128843
PF3D7_1364100	1364.36	0.171736	0.0799008	0.0122204	0.0504672
PF3D7_0903600	935.575	0.171904	0.09096	0.0215136	0.0751306
PF3D7_1359600	850.898	0.172223	0.10481	0.0338534	0.103459
PF3D7_1213100	1118.36	0.172419	0.10184	0.0311857	0.0974589
PF3D7_1143200	440.967	0.17258	0.103607	0.0324307	0.0999945
PF3D7_0606800	336.399	0.174945	0.110184	0.0360553	0.107952
PF3D7_1353600	742.505	0.176189	0.0954636	0.0225355	0.0770534
PF3D7_0105400	288.394	0.176268	0.116792	0.0405884	0.11812
PF3D7_0511200	360.511	0.176372	0.118919	0.0423033	0.121635
PF3D7_1322000	332.535	0.176493	0.111862	0.0364246	0.10882
PF3D7_1476300	732.927	0.176859	0.0904886	0.0178886	0.065658
PF3D7_1017100	448.524	0.17711	0.101932	0.0261404	0.0857909
PF3D7_0813100	312.603	0.177499	0.122009	0.0433625	0.123691
PF3D7_1410700	357.606	0.178174	0.110035	0.0333259	0.102107
PF3D7_1132800	1523.73	0.178569	0.0805964	0.00975844	0.0426502
PF3D7_0403600	480.738	0.179899	0.10072	0.0243211	0.081304
PF3D7_0401800	485.608	0.18051	0.107213	0.0290602	0.092504
PF3D7_1237700	1106.03	0.18065	0.089228	0.0148442	0.0572291
PF3D7_1323700	3447.01	0.18071	0.0822278	0.00993388	0.043207
PF3D7_0303700	294.701	0.182055	0.123394	0.0398236	0.116271
PF3D7_1356300	797.07	0.182655	0.0946459	0.0177449	0.0653311
PF3D7_0504600	398.226	0.183389	0.107956	0.027559	0.0890811
PF3D7_0513800	199.274	0.183567	0.135047	0.0458802	0.129104
PF3D7_1310600	457.661	0.184045	0.10214	0.0217752	0.0758968
PF3D7_1148200	240.151	0.184787	0.132201	0.0429685	0.123055
PF3D7_0413500	369.443	0.185098	0.107272	0.0258552	0.085088
PF3D7_1343300	493.077	0.185117	0.10564	0.0244957	0.0816601
PF3D7_1443100	389.416	0.185178	0.107291	0.0257899	0.0850288
PF3D7_1446000	263.479	0.185252	0.137836	0.0456892	0.128843
PF3D7_1007200	588.651	0.185381	0.100227	0.0203503	0.0721893
PF3D7_1235200	868.404	0.185694	0.08714	0.0111346	0.0470084
PF3D7_1136200	714.763	0.187538	0.0913767	0.0130515	0.0527487
PF3D7_1222700	2574.45	0.188406	0.081844	0.00720229	0.0339536
PF3D7_0926500	323.092	0.188665	0.121435	0.0330768	0.101517
PF3D7_0308100	400.177	0.189232	0.129409	0.0377029	0.111527
PF3D7_1235600	1379.03	0.190364	0.0867975	0.00919972	0.0410563
PF3D7_1030200	1130.22	0.190678	0.0887339	0.0101286	0.0438101
PF3D7_1435700	289.89	0.19068	0.121707	0.0318617	0.0988839
PF3D7_0506900	2231.52	0.192139	0.0771205	0.00431502	0.0231313
PF3D7_1030500	258.939	0.192283	0.124711	0.0324419	0.0999945
PF3D7_1032000	122.852	0.192528	0.16152	0.0487571	0.134993
PF3D7_0702100	362.104	0.192843	0.115294	0.0261682	0.0858039
PF3D7_0104400	239.101	0.193199	0.126844	0.0330232	0.101438
PF3D7_0613400	729.567	0.193289	0.0919475	0.0110346	0.0466408
PF3D7_1356100	443.584	0.193381	0.106008	0.0197151	0.0707019
PF3D7_0613300	564.777	0.193438	0.0967542	0.0138539	0.0548213
PF3D7_1331600	335.481	0.193727	0.110919	0.0228261	0.0777515
PF3D7_0911600	136.559	0.194242	0.153192	0.044947	0.127303
PF3D7_1246200	12252.1	0.19436	0.084237	0.00675813	0.0324346
PF3D7_0211900	102.956	0.194428	0.173187	0.04988	0.136961
PF3D7_0529400	1365.1	0.195366	0.0836852	0.00621514	0.0305014
PF3D7_0419700	321.072	0.195508	0.125108	0.03031	0.095804
PF3D7_0814400	115.272	0.195678	0.174795	0.0488316	0.135009
PF3D7_1244700	307.733	0.195688	0.124926	0.0300418	0.0952074
PF3D7_1466100	567.614	0.195726	0.101508	0.0156673	0.0597576
PF3D7_1361500	545.25	0.195898	0.0991732	0.014214	0.0556341
PF3D7_0705300	297.101	0.19596	0.11837	0.0260817	0.0856767
PF3D7_1008700	2749.22	0.196191	0.0909105	0.00945533	0.0418853
PF3D7_1238700	142.512	0.196202	0.159685	0.0457059	0.128843
PF3D7_1458300	380.976	0.196735	0.117182	0.0249641	0.0828375
PF3D7_1205500	3449.62	0.196808	0.107049	0.0185386	0.0675615
PF3D7_1019300	257.842	0.197859	0.144999	0.0386626	0.113606
PF3D7_1013500	469.368	0.198185	0.105232	0.0167618	0.0627389
PF3D7_0212600	886.099	0.198534	0.0859079	0.00641084	0.0312041
PF3D7_1341800	131.94	0.199111	0.166105	0.0446122	0.126554
PF3D7_0820900	239.484	0.199667	0.131516	0.0310532	0.0972285
PF3D7_0307400	205.842	0.199908	0.134186	0.0322429	0.0995518
PF3D7_1471400	548.297	0.200813	0.0998407	0.0125774	0.0512934
PF3D7_1031200	1189.46	0.20093	0.0888894	0.00710801	0.0335973
PF3D7_0916000	519.74	0.200962	0.112624	0.0198141	0.070776
PF3D7_1108500	646.688	0.201962	0.111187	0.018303	0.0668386
PF3D7_0707500	235.906	0.20272	0.284644	0.0347129	0.105014
PF3D7_0407900	775.085	0.202914	0.102326	0.013103	0.0528513
PF3D7_1423100	218.561	0.202924	0.136615	0.0313901	0.0977578
PF3D7_1465000	172.543	0.203149	0.151952	0.0376825	0.111527
PF3D7_0935400	89.7553	0.203723	0.185718	0.0453297	0.128189
PF3D7_0805100	75.801	0.204396	0.199519	0.045756	0.128884
PF3D7_0808300	775.232	0.204824	0.0921005	0.00749092	0.035222
PF3D7_0525400	107.74	0.205044	0.17572	0.0428935	0.123037
PF3D7_1017300	284.132	0.205347	0.12088	0.0219443	0.0762181
PF3D7_0414900	2049.86	0.206131	0.0804029	0.00309728	0.0179692
PF3D7_1229800	426.969	0.206175	0.106908	0.0141368	0.0555133
PF3D7_1107800	4961.08	0.207922	0.0840655	0.00388686	0.0211834
PF3D7_1329300	474.218	0.208152	0.103985	0.0119792	0.0497334
PF3D7_0415800	134.933	0.208395	0.158456	0.0365704	0.109074
PF3D7_0505200	143.676	0.208893	0.154624	0.035039	0.105714
PF3D7_1304100	936.638	0.209253	0.087362	0.00470494	0.0247784
PF3D7_0305600	448.554	0.209914	0.112455	0.0154438	0.0592231
PF3D7_1122500	162.436	0.210455	0.166711	0.0376826	0.111527
PF3D7_0815500	272.935	0.211697	0.123647	0.0202307	0.0718412
PF3D7_1433600	143.272	0.212194	0.16054	0.034696	0.105014
PF3D7_1349100	129.44	0.212614	0.164962	0.0358578	0.107484
PF3D7_0104300	2951.97	0.212962	0.115417	0.0155724	0.0595259
PF3D7_1410400	8930.49	0.213206	0.0678158	0.000497769	0.00494606
PF3D7_1344300	2420.89	0.215049	0.0929663	0.00550285	0.0278002
PF3D7_0423400	364.673	0.215755	0.122783	0.0178914	0.065658
PF3D7_0817800	134.655	0.216419	0.161995	0.0327978	0.10093
PF3D7_0914100	587.694	0.216609	0.104069	0.00931478	0.0414156
PF3D7_0306400	508.72	0.21664	0.101559	0.00829461	0.0379048
PF3D7_1014900	1143.96	0.216811	0.10665	0.01032	0.0444641
PF3D7_1438400	775.988	0.217675	0.114822	0.0136055	0.0542714
PF3D7_1449100	503.093	0.217677	0.101245	0.00793765	0.0369256
PF3D7_1019600	238.339	0.218418	0.132938	0.0212627	0.0744713
PF3D7_0817200	190.031	0.218736	0.150703	0.02803	0.089941
PF3D7_1343100	829.353	0.219292	0.0945861	0.00522065	0.0267693
PF3D7_1436600	1441.43	0.219368	0.0796395	0.00160866	0.0114582
PF3D7_0802800	714.917	0.219477	0.0965925	0.00584028	0.0291366
PF3D7_1469600	117.425	0.219536	0.17827	0.0349979	0.105699
PF3D7_1420600	260.682	0.219574	0.12503	0.0174032	0.0644688
PF3D7_0424300	863.811	0.219738	0.219497	0.0383893	0.112908
PF3D7_1401900	101.048	0.219854	0.193153	0.0370835	0.110239
PF3D7_0515900	223.2	0.219872	0.133262	0.0207484	0.0734133
PF3D7_0902100	198.399	0.220192	0.148495	0.0265583	0.0868457
PF3D7_0731000	126.654	0.22034	0.178015	0.0343936	0.104312
PF3D7_1132300	197.417	0.220662	0.137734	0.0221776	0.0765575
PF3D7_0109000	2433.72	0.220948	0.0824432	0.00196704	0.0130114
PF3D7_1307900	102.047	0.221068	0.203558	0.0373875	0.111051
PF3D7_1437400	137.194	0.221689	0.165515	0.031069	0.0972285
PF3D7_1423600	165.725	0.221822	0.147214	0.0251278	0.0833037
PF3D7_0403100	111.046	0.22263	0.181603	0.0341592	0.103804
PF3D7_1332200	1705.79	0.223562	0.096594	0.00509005	0.0263437
PF3D7_1138000	520.576	0.224573	0.112753	0.0105373	0.0451224
PF3D7_0217900	300.178	0.224575	0.12153	0.0139923	0.0551261
PF3D7_0414800	90.6717	0.224796	0.205417	0.0358235	0.10747
PF3D7_0308500	543.631	0.225536	0.120302	0.0131063	0.0528513
PF3D7_1031400	309.381	0.226576	0.118998	0.0124292	0.0509781
PF3D7_1423300	2070.75	0.226648	0.0764406	0.000803848	0.00700106
PF3D7_0409500	237.332	0.227016	0.127721	0.0155491	0.0595002
PF3D7_0500900	249.456	0.227388	0.128728	0.0158936	0.0603686
PF3D7_1313600	242.837	0.227478	0.148901	0.0232102	0.0786158
PF3D7_0729900	86.7296	0.227535	0.202501	0.034454	0.104407
PF3D7_1459900	171.87	0.228178	0.163652	0.0271099	0.0880092
PF3D7_0106900	89.2306	0.228664	0.205278	0.0341684	0.103804
PF3D7_1028700	2431.26	0.228693	0.0765639	0.0007409	0.0065319
PF3D7_0416100	419.242	0.228919	0.11144	0.00885688	0.0398227
PF3D7_0320400	106.903	0.228988	0.179702	0.030622	0.0964512
PF3D7_0810200	85.7919	0.229037	0.20241	0.0339516	0.103541
PF3D7_1421900	306.868	0.229644	0.125708	0.0138924	0.0548724
PF3D7_1466200	394.337	0.229737	0.126375	0.0140546	0.0553111
PF3D7_0104900	742.265	0.230381	0.286538	0.0316357	0.0984373
PF3D7_1321900	1130.8	0.23043	0.0877687	0.00212524	0.0137987
PF3D7_0525600	201.056	0.230922	0.142292	0.0194501	0.0701021
PF3D7_1341100	383.97	0.231271	0.126583	0.0136093	0.0542714
PF3D7_0404000	167.107	0.231456	0.155223	0.0233117	0.0788083
PF3D7_1435600	898.325	0.231499	0.0943821	0.00335119	0.0191034
PF3D7_1121000	129.473	0.233269	0.165103	0.025382	0.0839147
PF3D7_0924300	94.3502	0.23334	0.206914	0.0321331	0.0993832
PF3D7_0522600	686.789	0.233676	0.0972957	0.00373984	0.0205691
PF3D7_0803500	652.934	0.234023	0.108801	0.00685106	0.0327703
PF3D7_0112700	1901.52	0.234432	0.223554	0.0328015	0.10093
PF3D7_1236900	475.902	0.235207	0.102934	0.00496053	0.0258595
PF3D7_1224700	278.629	0.235695	0.134876	0.0151639	0.0582739
PF3D7_0405200	380.803	0.235986	0.110258	0.00690014	0.0329612
PF3D7_1200600	260.497	0.237172	0.161244	0.0226482	0.0772919
PF3D7_1446700	400.88	0.23798	0.108887	0.00610619	0.0300465
PF3D7_0503400	2548.56	0.238178	0.0894324	0.00178727	0.0123147
PF3D7_1026600	2712.06	0.238253	0.109357	0.00657166	0.0317621
PF3D7_1247500	558.286	0.238267	0.106503	0.00543089	0.027514
PF3D7_1009700	421.7	0.239486	0.108095	0.00564808	0.0284142
PF3D7_1467900	1072.97	0.239896	0.0975504	0.00307477	0.0178964
PF3D7_1236200	281.348	0.240133	0.13809	0.0148023	0.0571286
PF3D7_1206000	430.459	0.241777	0.11826	0.00807914	0.0373805
PF3D7_1350900	186.22	0.241827	0.147377	0.017033	0.06349
PF3D7_0808400	151.885	0.24185	0.166712	0.0224359	0.0769323
PF3D7_1469200	279.323	0.242037	0.133201	0.0126507	0.0515342
PF3D7_0104800	523.023	0.242443	0.101697	0.00365536	0.0202594
PF3D7_0618100	132.37	0.243738	0.176984	0.0240997	0.0808645
PF3D7_1403600	158.816	0.243793	0.158324	0.0194365	0.0701021
PF3D7_1435200	173.306	0.244282	0.157172	0.0190607	0.0691115
PF3D7_1327400	183.582	0.244292	0.151864	0.017634	0.0651225
PF3D7_1460500	298.676	0.244327	0.132441	0.0118357	0.0493316
PF3D7_1131800	473.021	0.244468	0.113801	0.00630964	0.0308367
PF3D7_0510100	1060.12	0.244492	0.106039	0.00435718	0.0233226
PF3D7_0102200	14204.8	0.244719	0.109349	0.00528272	0.0269149
PF3D7_0501600	5267.27	0.24562	0.0754675	0.0002666	0.00320723
PF3D7_0503600	943.738	0.24567	0.0929437	0.00179131	0.0123147
PF3D7_0308800	93.1186	0.247071	0.198361	0.0263523	0.0862753
PF3D7_1227600	735.236	0.247101	0.0982407	0.00250104	0.0155376
PF3D7_0908400	140.184	0.247462	0.163514	0.0195754	0.0704126
PF3D7_0301700	796.999	0.247483	0.0914375	0.00147008	0.0107259
PF3D7_1116100	1089.47	0.248761	0.102876	0.00319251	0.018403
PF3D7_0730400	667.055	0.249126	0.0968787	0.00212084	0.0137951
PF3D7_1224800	127.423	0.249694	0.176941	0.0219761	0.0762277
PF3D7_0220500	120.513	0.249836	0.173652	0.0211268	0.074212
PF3D7_0402300	971.825	0.249843	0.256627	0.0304408	0.0959644
PF3D7_0811600	1582.32	0.250986	0.103354	0.00306992	0.0178964
PF3D7_1234900	635.73	0.251572	0.0954291	0.00174156	0.0121169
PF3D7_0111500	557.897	0.252264	0.106446	0.00349851	0.0197029
PF3D7_1140400	1392.81	0.252445	0.0904415	0.00110576	0.00878666
PF3D7_1417800	695.684	0.253202	0.0980938	0.00199866	0.0131911
PF3D7_1206800	181.674	0.253615	0.151143	0.0146253	0.0567525
PF3D7_1035500	3481.44	0.256388	0.0846281	0.000518392	0.00508081
PF3D7_1129300	208.158	0.256998	0.151308	0.0136618	0.0544202
PF3D7_1035900	3158.76	0.257127	0.0785236	0.000228765	0.00293882
PF3D7_1443700	104.604	0.258721	0.197186	0.0223482	0.076778
PF3D7_1036500	843.83	0.259067	0.0926566	0.00104149	0.0084185
PF3D7_1245100	245.649	0.259648	0.136921	0.00943589	0.0418507
PF3D7_1308000	491.012	0.261206	0.117483	0.00465705	0.0245622
PF3D7_0402100	1578.48	0.261233	0.0931056	0.000996035	0.00816113
PF3D7_1461400	1604.43	0.261978	0.0895968	0.000691969	0.00620702
PF3D7_0320800	493.3	0.261981	0.107742	0.00277097	0.0166316
PF3D7_1362700	224.761	0.262189	0.152121	0.0125325	0.0511686
PF3D7_0308300	386.578	0.26246	0.115336	0.00406099	0.0220655
PF3D7_0613600	332.372	0.262657	0.120586	0.0051031	0.0263733
PF3D7_0927600	556.078	0.262815	0.0995493	0.00158648	0.0113451
PF3D7_0206800	7912.45	0.264785	0.0946492	0.000827631	0.00713921
PF3D7_1361800	10395.3	0.264952	0.0821393	0.000277345	0.00324954
PF3D7_1011000	81.4877	0.265498	0.21547	0.0226018	0.0772067
PF3D7_1019800	220.428	0.265564	0.14308	0.00975236	0.0426502
PF3D7_0821000	933.056	0.265588	0.0889986	0.000559781	0.00534093
PF3D7_0522100	200.739	0.265855	0.146963	0.0106035	0.0451906
PF3D7_0927300	246.75	0.266102	0.129375	0.00647572	0.0314348
PF3D7_0102700	194.389	0.266111	0.143344	0.00962637	0.042424
PF3D7_0525800	7738.67	0.266362	0.079854	0.000172329	0.00238768
PF3D7_1018200	1143.18	0.267499	0.105245	0.00200239	0.0131915
PF3D7_0934800	2416.93	0.267958	0.0795729	0.000152843	0.00221684
PF3D7_0813800	86.5097	0.268104	0.206191	0.0209596	0.0737686
PF3D7_1238600	427.231	0.269208	0.107975	0.00224323	0.014383
PF3D7_1239200	1216.25	0.269546	0.109288	0.002428	0.0151624
PF3D7_1436200	900.71	0.271192	0.112369	0.00277424	0.0166316
PF3D7_1022700	358.605	0.271288	0.116198	0.00329416	0.018868
PF3D7_1125800	1767.69	0.271461	0.0809606	0.000157999	0.00228063
PF3D7_1312600	290.511	0.271556	0.141083	0.00812739	0.0374101
PF3D7_0201500	155.132	0.2725	0.167941	0.0134786	0.0539896
PF3D7_0724800	179.26	0.272911	0.149184	0.00964206	0.042424
PF3D7_0628300	7601.65	0.273216	0.0801374	0.000126813	0.00193282
PF3D7_0620400	259.148	0.273588	0.132598	0.00607503	0.0299341
PF3D7_1007300	251.735	0.273633	0.152263	0.0101232	0.0438101
PF3D7_1017500	1590.07	0.275226	0.0839347	0.000197469	0.00262177
PF3D7_0931300	269.983	0.275956	0.130034	0.00523181	0.0267693
PF3D7_0508800	369.044	0.276651	0.118241	0.00312692	0.0180828
PF3D7_1335000	75.0092	0.277466	0.244697	0.0218573	0.0761091
PF3D7_1228300	316.184	0.277977	0.119897	0.00327583	0.0187929
PF3D7_1137200	180.035	0.278455	0.158777	0.0105894	0.0451906
PF3D7_1472600	679.329	0.278962	0.0969416	0.000710025	0.00633737
PF3D7_1449600	98.9041	0.280522	0.200093	0.0171546	0.0638361
PF3D7_1415300	321.181	0.281413	0.129045	0.00442575	0.0235494
PF3D7_0614700	233.406	0.281525	0.133383	0.00515339	0.026557
PF3D7_1035400	4612.09	0.281896	0.0798918	7.70653e-05	0.00143621
PF3D7_0803300	97.267	0.282127	0.199195	0.016667	0.0625144
PF3D7_1417300	116.508	0.283982	0.198376	0.0161372	0.0609722
PF3D7_1331500	177.295	0.286011	0.153788	0.00830387	0.0379048
PF3D7_1420200	382.771	0.286252	0.12734	0.00368325	0.0203526
PF3D7_1341500	163.899	0.286813	0.159095	0.00912415	0.0409222
PF3D7_0219500	108.424	0.28692	0.202564	0.0160966	0.0609173
PF3D7_0615500	223.418	0.287166	0.138971	0.00542082	0.0275017
PF3D7_1338700	645.108	0.287336	0.098373	0.000586367	0.00555042
PF3D7_1127600	1190.59	0.288075	0.0850548	0.00012469	0.00193282
PF3D7_1209400	475.985	0.288747	0.128225	0.00356898	0.0199033
PF3D7_0220300	185.123	0.288997	0.15963	0.00880283	0.0396789
PF3D7_0918700	557.521	0.289207	0.114826	0.00182551	0.0124128
PF3D7_0604100	1971.75	0.289801	0.100851	0.000669393	0.00608032
PF3D7_1146600	1041.03	0.290129	0.0943058	0.000354505	0.00388767
PF3D7_1359700	285.288	0.29015	0.15883	0.00852578	0.0387161
PF3D7_0828800	1578.69	0.291676	0.0842247	9.38191e-05	0.00161468
PF3D7_1118400	270.73	0.292215	0.128077	0.00325907	0.0187267
PF3D7_1455700	173.047	0.293244	0.150676	0.00667328	0.0320906
PF3D7_0911100	1241.59	0.29356	0.10375	0.000747799	0.00656057
PF3D7_1251200	4431.59	0.293576	0.0739483	1.33381e-05	0.000414583
PF3D7_1122300	77.5374	0.293636	0.282395	0.0202322	0.0718412
PF3D7_1231400	382.222	0.293746	0.127727	0.00308833	0.0179463
PF3D7_1457500	89.851	0.294274	0.220801	0.0165923	0.0623643
PF3D7_0206900	508.239	0.295007	0.106928	0.000902831	0.00752833
PF3D7_0528400	706.449	0.295268	0.0967982	0.000371204	0.00398574
PF3D7_0902800	326.758	0.296952	0.11794	0.00174158	0.0121169
PF3D7_1023000	130.838	0.297953	0.187508	0.0118856	0.0494821
PF3D7_1243400	107.969	0.298411	0.191385	0.0124051	0.0509372
PF3D7_1245400	110.192	0.298561	0.187247	0.0117033	0.0488928
PF3D7_0607600	521.933	0.299664	0.109991	0.000977234	0.00806218
PF3D7_0704400	322.633	0.300432	0.134588	0.00344663	0.0195236
PF3D7_0403800	1472.28	0.300769	0.087877	0.000101877	0.00168097
PF3D7_0105800	570.418	0.301585	0.106287	0.000693738	0.0062074
PF3D7_0919200	301.328	0.30168	0.120828	0.00180251	0.0123147
PF3D7_0304100	648.064	0.303285	0.0952014	0.000227907	0.00293829
PF3D7_1105300	555.658	0.303291	0.10688	0.000682306	0.00616646
PF3D7_1410800	266.983	0.303507	0.127932	0.00242262	0.015155
PF3D7_1223100	3560.04	0.304589	0.0734477	5.72058e-06	0.000228633
PF3D7_1038400	140.818	0.304596	0.185334	0.0103597	0.0445392
PF3D7_1335100	4204.14	0.305814	0.0700658	2.16122e-06	0.00011777
PF3D7_1115900	257.515	0.309117	0.128463	0.00215072	0.0138889
PF3D7_1312500	96.0044	0.310117	0.224662	0.0140851	0.0553705
PF3D7_0810300	1534.5	0.312601	0.0867027	4.85448e-05	0.00103906
PF3D7_1014100	1256.67	0.313932	0.105928	0.000438707	0.00449581
PF3D7_0919300	463.882	0.314644	0.107205	0.000473918	0.00478843
PF3D7_1246400	1781.79	0.315288	0.0908775	7.87167e-05	0.00144461
PF3D7_0704800	561.225	0.315665	0.101014	0.000259397	0.00314159
PF3D7_1411000	537.808	0.31721	0.138556	0.00271845	0.0164895
PF3D7_1028600	467.404	0.317464	0.107297	0.000435509	0.00448862
PF3D7_1451700	280.801	0.319296	0.127181	0.00155029	0.0111528
PF3D7_0914900	217.854	0.319952	0.140329	0.0027468	0.0165796
PF3D7_1104900	646.182	0.320089	0.109926	0.000494219	0.00493807
PF3D7_1365600	145.614	0.320279	0.172889	0.00663292	0.0319592
PF3D7_0421400	70.7535	0.322116	0.243712	0.0138973	0.0548724
PF3D7_1036000	811.692	0.322236	0.0965927	0.000122616	0.00193282
PF3D7_1003600	6074.85	0.322278	0.0843142	1.99185e-05	0.000551557
PF3D7_1117100	283.051	0.322371	0.126026	0.00134508	0.0101858
PF3D7_1147200	135.714	0.323888	0.190137	0.00839545	0.0382259
PF3D7_1016000	128.89	0.325742	0.18918	0.00814347	0.0374101
PF3D7_0822900	2048.87	0.32577	0.105503	0.000276683	0.00324954
PF3D7_0932200	2669.24	0.326634	0.091511	5.13795e-05	0.00108077
PF3D7_1022200	104.602	0.327174	0.230275	0.0122436	0.0504949
PF3D7_1252800	778.894	0.32753	0.113577	0.000517516	0.00508081
PF3D7_1307500	261.489	0.327729	0.135857	0.00191431	0.01284
PF3D7_1127900	330.933	0.32936	0.121874	0.00086527	0.00734051
PF3D7_1147600	101.194	0.331772	0.205009	0.00921888	0.0410908
PF3D7_1354200	279.266	0.331878	0.127615	0.00114143	0.00898408
PF3D7_1423500	89.007	0.332821	0.220798	0.0106909	0.045509
PF3D7_1209500	166.136	0.333709	0.163001	0.00423091	0.022818
PF3D7_0424100	296.205	0.33377	0.126307	0.00100882	0.00824712
PF3D7_0725400	1095.46	0.334161	0.0922463	4.03645e-05	0.000913152
PF3D7_0705400	694.58	0.334259	0.100139	0.000113715	0.00183423
PF3D7_1446300	327.737	0.335265	0.136895	0.00166058	0.011735
PF3D7_0805200	583.668	0.335282	0.131224	0.00124913	0.00962126
PF3D7_1316200	263.199	0.33647	0.135161	0.00149781	0.0108472
PF3D7_1413700	429.38	0.336996	0.132174	0.00126888	0.009739
PF3D7_1406900	99.1784	0.33741	0.1983	0.00784626	0.0367009
PF3D7_0216400	87.9165	0.337604	0.229256	0.0108367	0.0460206
PF3D7_0909600	222.307	0.339296	0.146033	0.00223631	0.0143643
PF3D7_1416500	2485.69	0.339892	0.0975901	6.80642e-05	0.00131757
PF3D7_1440100	704.541	0.340468	0.0944757	4.23648e-05	0.000943118
PF3D7_0618500	197.815	0.342222	0.149958	0.00238752	0.0150401
PF3D7_0904400	145.055	0.342723	0.16409	0.00369636	0.0203611
PF3D7_0806200	183.446	0.344144	0.163105	0.00351065	0.0197029
PF3D7_0808900	192.737	0.346427	0.159681	0.00302139	0.0177291
PF3D7_0507500	2510.89	0.346565	0.0803762	2.21807e-06	0.00011777
PF3D7_0321400	610.86	0.346788	0.104974	0.000120093	0.00191139
PF3D7_1116900	88.7065	0.347689	0.219194	0.00871024	0.0394097
PF3D7_0908500	363.957	0.34975	0.115492	0.000295785	0.00338834
PF3D7_1445000	75.123	0.350127	0.232888	0.00966489	0.042424
PF3D7_0102500	4255.09	0.350238	0.115376	0.000286275	0.00331104
PF3D7_1128900	641.129	0.350484	0.0979006	4.40868e-05	0.000966952
PF3D7_1422600	171.54	0.350906	0.155014	0.00240456	0.0150683
PF3D7_0214700	200.833	0.351504	0.141684	0.00141454	0.0105235
PF3D7_0316000	169.942	0.35181	0.162723	0.00299701	0.0176436
PF3D7_0420600	227.509	0.357397	0.141063	0.00120356	0.00937056
PF3D7_0423500	4843.46	0.357827	0.0814331	1.46166e-06	8.76267e-05
PF3D7_0213000	80.5069	0.358033	0.236319	0.00918015	0.0410375
PF3D7_1149600	253.43	0.361899	0.129855	0.000582112	0.00553931
PF3D7_0510900	108.611	0.362909	0.208551	0.00634727	0.0309784
PF3D7_1407600	72.1261	0.365974	0.255093	0.00962124	0.042424
PF3D7_1218500	1103.43	0.367033	0.10784	7.78599e-05	0.00143621
PF3D7_0705100	138.978	0.367063	0.177678	0.00346495	0.0195966
PF3D7_1238900	1556.67	0.368785	0.0892763	4.48703e-06	0.000200842
PF3D7_1475800	161.935	0.368806	0.161822	0.0021293	0.0138002
PF3D7_0214600	896.447	0.369851	0.121684	0.000257202	0.00312553
PF3D7_0424200	463.56	0.370314	0.140491	0.000857924	0.0072954
PF3D7_1204900	326.041	0.373587	0.125338	0.000308813	0.0035041
PF3D7_0935390	147.747	0.374371	0.168513	0.00238141	0.0150279
PF3D7_1310700	2808.88	0.375043	0.0810571	4.55381e-07	3.38844e-05
PF3D7_1435300	1191.29	0.375796	0.123709	0.000254953	0.00311927
PF3D7_0926200	129.216	0.376751	0.213515	0.00575309	0.0288216
PF3D7_1437700	140.148	0.376876	0.166607	0.00214475	0.0138753
PF3D7_1437300	189.811	0.377187	0.152222	0.00127017	0.009739
PF3D7_0318700	371.689	0.378371	0.126677	0.000292149	0.00335738
PF3D7_0501500	1119.9	0.379021	0.0920348	4.52272e-06	0.000200842
PF3D7_0108600	113.28	0.379066	0.233869	0.00716523	0.0338233
PF3D7_0210600	1048.88	0.381048	0.088448	1.94666e-06	0.000111145
PF3D7_0805300	256.093	0.382418	0.173503	0.00238092	0.0150279
PF3D7_0308700	276.741	0.383805	0.131549	0.000355823	0.00389026
PF3D7_1401800	1119.61	0.385726	0.08336	4.40569e-07	3.38844e-05
PF3D7_1143100	1671.29	0.385773	0.0991597	1.13284e-05	0.000370439
PF3D7_1356400	92.6824	0.387611	0.215449	0.00518004	0.0266352
PF3D7_1243700	780.525	0.38901	0.0969252	6.77887e-06	0.000260284
PF3D7_0818100	1028.17	0.389325	0.087234	9.40503e-07	6.383e-05
PF3D7_1437200	3114.37	0.389877	0.0755453	2.93742e-08	3.77354e-06
PF3D7_1003000	154.659	0.390099	0.177784	0.0023764	0.0150279
PF3D7_0829800	586.167	0.390208	0.111464	4.91075e-05	0.00103906
PF3D7_0403900	315.174	0.391202	0.118786	0.000102744	0.00168753
PF3D7_1455300	2662.79	0.391533	0.0803097	1.26619e-07	1.33955e-05
PF3D7_0810900	164.523	0.393313	0.157288	0.00110902	0.00878666
PF3D7_1473400	273.219	0.393347	0.135441	0.000359056	0.00389752
PF3D7_1218000	611.837	0.394329	0.105527	1.9934e-05	0.000551557
PF3D7_1036300	114.586	0.395615	0.188331	0.00281973	0.0168481
PF3D7_1327300	1068.47	0.396158	0.0992379	7.13289e-06	0.000264505
PF3D7_0621100	739.128	0.396477	0.100522	8.77383e-06	0.000307615
PF3D7_0704500	469.744	0.398569	0.107257	2.14487e-05	0.000571488
PF3D7_1244400	936.365	0.399237	0.137844	0.000350086	0.00386276
PF3D7_1239000	649.431	0.401205	0.0982634	4.81733e-06	0.000208494
PF3D7_0303100	259.397	0.401857	0.136416	0.000305806	0.00348097
PF3D7_1133400	2384.3	0.403377	0.093177	1.62943e-06	9.45332e-05
PF3D7_1136900	984.282	0.409792	0.098268	3.22391e-06	0.00016333
PF3D7_1129700	73.2388	0.410764	0.235115	0.00513434	0.0264968
PF3D7_1136700	186.133	0.411466	0.146896	0.000455965	0.00463307
PF3D7_1149200	5254.25	0.411702	0.117322	4.38143e-05	0.000966871
PF3D7_1342600	10714.8	0.417083	0.0795607	1.73185e-08	2.58573e-06
PF3D7_1443000	138.405	0.418487	0.171154	0.00117126	0.0091787
PF3D7_0418300	1111.26	0.419472	0.0881926	2.07623e-07	2.01843e-05
PF3D7_0618000	1172.42	0.420658	0.0874031	1.58221e-07	1.62606e-05
PF3D7_1422200	128.066	0.421967	0.188989	0.00192341	0.01284
PF3D7_0408000	302.065	0.423672	0.126101	7.31503e-05	0.00138657
PF3D7_1004500	135.245	0.424831	0.180892	0.00145145	0.0106985
PF3D7_1416600	143.262	0.430756	0.194669	0.00192404	0.01284
PF3D7_0808200	1777.74	0.43181	0.0851419	4.06712e-08	4.71917e-06
PF3D7_0620300	71.9286	0.432188	0.263704	0.00566009	0.0284348
PF3D7_1124600	2067.64	0.434866	0.0762046	1.21408e-09	3.11932e-07
PF3D7_1012100	100.646	0.436255	0.205027	0.00230107	0.0146785
PF3D7_1221300	452.591	0.43737	0.110482	7.09704e-06	0.000264505
PF3D7_1337700	134.317	0.451126	0.178432	0.000855169	0.0072892
PF3D7_0526600	630.081	0.453176	0.118276	1.14351e-05	0.00037056
PF3D7_1460600	404.496	0.454326	0.115462	7.52478e-06	0.000273108
PF3D7_0829900	496.487	0.454603	0.129856	3.92396e-05	0.000899011
PF3D7_0206200	1300.61	0.457109	0.084874	6.99221e-09	1.39728e-06
PF3D7_1035600	234.086	0.459876	0.133475	4.81178e-05	0.00103641
PF3D7_0315200	115.594	0.464573	0.186997	0.000904152	0.00752833
PF3D7_0621000	74.6869	0.465768	0.250208	0.00353156	0.0197559
PF3D7_1415700	97.2125	0.467674	0.208411	0.00160084	0.0114251
PF3D7_1304200	355.633	0.471868	0.118152	5.59936e-06	0.000228081
PF3D7_0528300	129.177	0.472277	0.175601	0.000518089	0.00508081
PF3D7_1404700	170.438	0.472316	0.160189	0.000242184	0.00303532
PF3D7_1037500	945.762	0.475478	0.0875156	5.11119e-09	1.14906e-06
PF3D7_1409300	356.138	0.482298	0.128476	1.42709e-05	0.000427772
PF3D7_0731500	11088.8	0.482369	0.200607	0.00103517	0.00838628
PF3D7_0629300	218.155	0.488571	0.146918	6.74891e-05	0.00131757
PF3D7_1205200	156.112	0.497597	0.163103	0.00016626	0.00234525
PF3D7_1345600	768.534	0.497925	0.09643	2.09292e-08	2.89548e-06
PF3D7_1134600	72.0754	0.505831	0.264363	0.00283096	0.0168872
PF3D7_0920700	482.486	0.507662	0.111448	4.35586e-07	3.38844e-05
PF3D7_1315300	317.461	0.514645	0.130842	6.56031e-06	0.000256494
PF3D7_1348600	303.862	0.529576	0.130074	3.57348e-06	0.000176079
PF3D7_1351700	2867.96	0.529876	0.101983	1.6548e-08	2.58573e-06
PF3D7_1439500	888.155	0.530489	0.113343	2.26139e-07	2.14058e-05
PF3D7_0927200	129.905	0.536756	0.19323	0.000343427	0.00380095
PF3D7_0304000	125.81	0.539319	0.189614	0.000282425	0.00329832
PF3D7_1252200	84.6756	0.540037	0.210504	0.000610861	0.00570719
PF3D7_0104200	1137.97	0.562467	0.0994427	1.20967e-09	3.11932e-07
PF3D7_0830200	157.034	0.56453	0.164196	3.92295e-05	0.000899011
PF3D7_0103800	193.961	0.577885	0.144092	4.19397e-06	0.000190958
PF3D7_0423800	763.109	0.586943	0.0914366	1.05318e-11	8.37777e-09
PF3D7_1301600	2669.22	0.601537	0.0973036	4.68158e-11	2.80661e-08
PF3D7_1337800	1107.13	0.620893	0.104151	1.79755e-10	6.4658e-08
PF3D7_0525300	182.216	0.628118	0.172434	1.70391e-05	0.000493073
PF3D7_0630100	79.3689	0.629007	0.217401	0.000212212	0.00277573
PF3D7_1131500	81.8214	0.63061	0.235596	0.00038464	0.00409334
PF3D7_1468400	1051.54	0.66297	0.0914296	2.953e-14	3.54064e-11
PF3D7_0210700	128.328	0.664609	0.204699	6.66467e-05	0.00131123
PF3D7_1224200	114.473	0.673366	0.203725	5.43811e-05	0.00113069
PF3D7_1221400	172.569	0.692738	0.154423	4.61589e-07	3.38844e-05
PF3D7_1231200	297.59	0.693633	0.138184	3.34328e-08	4.0086e-06
PF3D7_1217900	208.913	0.711008	0.13842	1.79715e-08	2.58573e-06
PF3D7_0402200	1176.52	0.765883	0.126214	8.19418e-11	3.68431e-08
PF3D7_1474000	220.855	0.771042	0.146524	8.52996e-09	1.53411e-06
PF3D7_1421150	193.346	0.820096	0.161501	2.23723e-08	2.98048e-06
PF3D7_0420300	3115.59	0.86174	0.201363	9.80747e-07	6.53286e-05
PF3D7_0905500	122.297	0.869392	0.194905	4.57514e-07	3.38844e-05
PF3D7_1226100	113.786	0.956844	0.183589	1.02018e-08	1.74741e-06

## Sheet: S14 legend
Differential gene expression analysis at 12 hpi between untreated (-Rapamycin) and treated (+Rapamycin) DDX5-GFP-FKBP parasites. Analysis was performed for n=5,610 genes (ID and chromosome locations are given) with three replicates for untreated and rapamycin-treated DDX5-GFP-FKBP parasites. Only significantly up- or down-regulated genes are listed, and active var is highlighted in grey. log2(Fol…
